# Supplementary material for: Identification of Novel Biomarkers for Priority Serotypes of Shiga Toxin-Producing Escherichia coli and the Development of Multiplex PCR for Their Detection
Source: Front Microbiol. 2018 Jun 26;9:1321. doi: 10.3389/fmicb.2018.01321 (PMC6028524; doi:10.3389/fmicb.2018.01321)
Supplement: TABLE S2 — In silico genomes used from Refseq + GenBank. [file Table_2.XLSX]

## Sheet: S2-in silico_genomes
# name (last contig/scaffold for drafts)	accession (first..last)	MLST	CC	Database
Escherichia coli 0.1288 E01288.contig.190_1	AMVJ01000001..AMVJ01000170	5559	-	Genbank		NT = not typable
Escherichia coli 0.1304 E01304.contig.624_1	AMVK01000001..AMVK01000543	11	ST11 Cplx	Genbank
Escherichia coli 0127:H6 E2348/69	FM180568..FM180570	15	-	Genbank
Escherichia coli 042 complete genome	FN554766..FN554767	414	-	Genbank
Escherichia coli 07798 E07798.contig.252_1	AMUP01000001..AMUP01000249	5611	-	Genbank
Escherichia coli 08BKT055439 gec08BKT055439.contig.136	AVRI01000001..AVRI01000134	11	ST11 Cplx	Genbank
Escherichia coli 08BKT77219 gec08BKT77219.contig.147	AVRJ01000001..AVRJ01000140	11	ST11 Cplx	Genbank
Escherichia coli 09BKT024447 gec09bkt024447.contig.152	AVRK01000001..AVRK01000150	11	ST11 Cplx	Genbank
Escherichia coli 09BKT076207 gec09BKT076207.contig.70	AVQR01000001..AVQR01000071	11	ST11 Cplx	Genbank
Escherichia coli 09BKT078844 gec09BKT078844.contig.883_1	AODX01000001..AODX01000623	11	ST11 Cplx	Genbank
Escherichia coli 1.2264 Contig1548	AEZO02000001..AEZO02000031	675	-	Genbank
Escherichia coli 1.2741 Contig1651129016	AEZI02000001..AEZI02000028	2715	-	Genbank
Escherichia coli 10.0821 gec100821.contig.107	AMTO01000001..AMTO01000108	11	ST11 Cplx	Genbank
Escherichia coli 10.0833 gec100833.contig.549_2	AMTK01000001..AMTK01000488	11	ST11 Cplx	Genbank
Escherichia coli 10.0869 gec100869.contig.489_2	AMTL01000001..AMTL01000419	11	ST11 Cplx	Genbank
Escherichia coli 101-1 gcontig_1112603667253	AAMK02000001..AAMK02000091	5655	-	Genbank
Escherichia coli 1047	AYQG00000000.1	117	-	Genbank
Escherichia coli 10810	JDWQ00000000.1	131	ST131 Cplx	Genbank
Escherichia coli 110957 E_coliHMPREF1588-1.0_Cont1112.8	AXUE01000001..AXUE01000305	405	ST405 Cplx	Genbank
Escherichia coli 1-110-08_S1_C1 e111008S1C1.contig.127_1	JHDQ01000001..JHDQ01000128	10	ST10 Cplx	Genbank
Escherichia coli 1-110-08_S1_C2 e111008S1C2.contig.136_1	JHDP01000001..JHDP01000137	155	ST155 Cplx	Genbank
Escherichia coli 1-110-08_S1_C3 e111008S1C3.contig.132_1	JHDO01000001..JHDO01000133	10	ST10 Cplx	Genbank
Escherichia coli 1-110-08_S3_C1 e111008S3C1.contig.188_1	JHDN01000001..JHDN01000188	10	ST10 Cplx	Genbank
Escherichia coli 1-110-08_S3_C2 e111008S3C2.contig.175_1	JHDM01000001..JHDM01000176	10	ST10 Cplx	Genbank
Escherichia coli 1-110-08_S3_C3 e111008S3C3.contig.174_1	JHDL01000001..JHDL01000175	10	ST10 Cplx	Genbank
Escherichia coli 1-110-08_S4_C1 e111008S4C1.contig.158_1	JHDK01000001..JHDK01000159	38	ST38 Cplx	Genbank
Escherichia coli 1-110-08_S4_C2 e111008S4C2.contig.198_1	JHDJ01000001..JHDJ01000199	10	ST10 Cplx	Genbank
Escherichia coli 1-110-08_S4_C3 e111008S4C3.contig.195_1	JHDI01000001..JHDI01000196	10	ST10 Cplx	Genbank
Escherichia coli 11117	JDWR00000000.1	131	ST131 Cplx	Genbank
Escherichia coli 112469215-isolate1	ATOF00000000.1	69	ST69 Cplx	Genbank
Escherichia coli 112469218-isolate1	ATOE00000000.1	69	ST69 Cplx	Genbank
Escherichia coli 113290 E_coliHMPREF1589-1.0_Cont1209.4	AXUF01000001..AXUF01000263	57	ST350 Cplx	Genbank
Escherichia coli 113302 E_coliHMPREF1590-1.0_Cont1444.2	AXTB01000001..AXTB01000345	1431	-	Genbank
Escherichia coli 113303 E_coliHMPREF1591-1.0_Cont638.1	AXUG01000001..AXUG01000149	224	-	Genbank
Escherichia coli 1-176-05_S1_C1 e117605S1C1.contig.172_1	JHDH01000001..JHDH01000172	10	ST10 Cplx	Genbank
Escherichia coli 1-176-05_S1_C2 e117605S1C2.contig.173_1	JJMA01000001..JJMA01000171	10	ST10 Cplx	Genbank
Escherichia coli 1-176-05_S1_C3 e117605S1C3.contig.156_1	JJLY01000001..JJLY01000157	10	ST10 Cplx	Genbank
Escherichia coli 1-176-05_S3_C1 e117605S3C1.contig.188_1	JHDG01000001..JHDG01000189	206	ST206 Cplx	Genbank
Escherichia coli 1-176-05_S3_C2 e117605S3C2.contig.67_1	JHDF01000001..JHDF01000068	5792	-	Genbank
Escherichia coli 1-176-05_S4_C1 e117605S4C1.contig.179_1	JJLQ01000001..JJLQ01000180	10	ST10 Cplx	Genbank
Escherichia coli 1-176-05_S4_C2 e117605S4C2.contig.163_1	JMGW01000001..JMGW01000164	10	ST10 Cplx	Genbank
Escherichia coli 1-176-05_S4_C3 e117605S4C3.contig.193_1	JJLI01000001..JJLI01000194	10	ST10 Cplx	Genbank
Escherichia coli 1-182-04_S1_C1 e118204S1C1.contig.88_1	JJMD01000001..JJMD01000089	23	ST23 Cplx	Genbank
Escherichia coli 1-182-04_S1_C2 e118204S1C2.contig.113_1	JMGS01000001..JMGS01000112	23	ST23 Cplx	Genbank
Escherichia coli 1-182-04_S1_C3 e118204S1C3.contig.88_1	JJLX01000001..JJLX01000089	23	ST23 Cplx	Genbank
Escherichia coli 1-182-04_S3_C1 e118204S3C1.contig.305_1	JJLV01000001..JJLV01000306	5275	-	Genbank
Escherichia coli 1-182-04_S3_C2 e118204S3C2.contig.260_1	JJLT01000001..JJLT01000261	5275	-	Genbank
Escherichia coli 1-182-04_S3_C3 e118204S3C3.contig.305_1	JJLS01000001..JJLS01000306	5275	-	Genbank
Escherichia coli 1-182-04_S4_C1 e118204S4C1.contig.108_1	JJLP01000001..JJLP01000109	2186	-	Genbank
Escherichia coli 1-182-04_S4_C2 e118204S4C2.contig.87_1	JJLM01000001..JJLM01000088	2186	-	Genbank
Escherichia coli 1-182-04_S4_C3 e118204S4C3.contig.105_1	JJLH01000001..JJLH01000105	2186	-	Genbank
Escherichia coli 1240	AYQI00000000.1	58	ST155 Cplx	Genbank
Escherichia coli 1-250-04_S1_C1 e125004S1C1.contig.107_1	JNQB01000001..JNQB01000108	449	ST31 Cplx	Genbank
Escherichia coli 1-250-04_S1_C2 e125004S1C2.contig.102_1	JNQC01000001..JNQC01000103	449	ST31 Cplx	Genbank
Escherichia coli 1-250-04_S1_C3 e125004S1C3.contig.168_1	JJLW01000001..JJLW01000169	449	ST31 Cplx	Genbank
Escherichia coli 1-250-04_S3_C1 e125004S3C1.contig.202_1	JJLU01000001..JJLU01000203	3036	-	Genbank
Escherichia coli 1-250-04_S3_C2 e125004S3C2.contig.305_1	JOSR01000001..JOSR01000303	3036	-	Genbank
Escherichia coli 1-250-04_S4_C1 e125004S4C1.contig.161_1	JJLO01000001..JJLO01000161	746	-	Genbank
Escherichia coli 1-250-04_S4_C2 e125004S4C2.contig.167_1	JJLL01000001..JJLL01000168	746	-	Genbank
Escherichia coli 1350	AYQJ00000000.1	58	ST155 Cplx	Genbank
Escherichia coli 1365	AYQK00000000.1	58	ST155 Cplx	Genbank
Escherichia coli 1-392-07_S1_C1 e139207S1C1.contig.173_1	JNPT01000001..JNPT01000174	38	ST38 Cplx	Genbank
Escherichia coli 1-392-07_S1_C2 e139207S1C2.contig.137_1	JNPU01000001..JNPU01000138	38	ST38 Cplx	Genbank
Escherichia coli 1-392-07_S3_C1 e139207S3C1.contig.217_1	JNPY01000001..JNPY01000218	1602	-	Genbank
Escherichia coli 1-392-07_S3_C2 e139207S3C2.contig.215_1	JNPP01000001..JNPP01000216	1602	-	Genbank
Escherichia coli 1-392-07_S3_C3 e139207S3C3.contig.221_1	JJLR01000001..JJLR01000222	1602	-	Genbank
Escherichia coli 1-392-07_S4_C1 e139207S4C1.contig.411_1	JOSK01000001..JOSK01000412	223	ST155 Cplx	Genbank
Escherichia coli 1-392-07_S4_C2 e139207S4C2.contig.90_1	JJLK01000001..JJLK01000091	3497	-	Genbank
Escherichia coli 1-392-07_S4_C3 e139207S4C3.contig.267_1	JOSH01000001..JOSH01000267	223	ST155 Cplx	Genbank
Escherichia coli 148	AYJX00000000.1	10	ST10 Cplx	Genbank
Escherichia coli 14A gec14A.contig.130	AVRQ01000001..AVRQ01000130	11	ST11 Cplx	Genbank
Escherichia coli 174750 gec174750.contig.312	AQEI01000001..AQEI01000311	1408	-	Genbank
Escherichia coli 174900 gec174900.contig.101	AQGI01000001..AQGI01000101	156	ST156 Cplx	Genbank
Escherichia coli 178200 gec178200.contig.435	APWY01000001..APWY01000433	NT	-	Genbank
Escherichia coli 178850 gec178850.contig.793	APWZ01000001..APWZ01000783	2851	-	Genbank
Escherichia coli 178900 gec178900.contig.356	APXA01000001..APXA01000355	NT	-	Genbank
Escherichia coli 179100 gec179100.contig.193	APZJ01000001..APZJ01000194	328	ST278 Cplx	Genbank
Escherichia coli 179550 gec179550.contig.387	APXB01000001..APXB01000385	NT	-	Genbank
Escherichia coli 180050 gec180050.contig.134	AQEH01000001..AQEH01000135	NT	-	Genbank
Escherichia coli 180200 gec180200.contig.336	APXC01000001..APXC01000329	NT	-	Genbank
Escherichia coli 180600 gec180600.contig.149	AQEG01000001..AQEG01000150	NT	-	Genbank
Escherichia coli 1827-70 gec1827.assembly.9	ADUK01000001..ADUK01000035	398	ST398 Cplx	Genbank
Escherichia coli 199900.1 gec1999001.contig.125	AQEF01000001..AQEF01000125	423	ST23 Cplx	Genbank
Escherichia coli 1A	AYQX00000000.1	23	ST23 Cplx	Genbank
Escherichia coli 2.3916 ctg1127168676001	AFAB02000001..AFAB02000234	10	ST10 Cplx	Genbank
Escherichia coli 2.4168 ctg1126004750283	AFAD02000001..AFAD02000019	10	ST10 Cplx	Genbank
Escherichia coli 2-005-03_S1_C1 e200503S1C1.contig.153_1	JJME01000001..JJME01000154	5257	-	Genbank
Escherichia coli 2-005-03_S1_C2 e200503S1C2.contig.154_1	JJMC01000001..JJMC01000155	5257	-	Genbank
Escherichia coli 2-005-03_S1_C3 e200503S1C3.contig.165_1	JJLZ01000001..JJLZ01000166	5257	-	Genbank
Escherichia coli 2-005-03_S3_C1 e200503S3C1.contig.167_1	JNPQ01000001..JNPQ01000168	2178	-	Genbank
Escherichia coli 2-005-03_S3_C2 e200503S3C2.contig.120_1	JMGT01000001..JMGT01000121	69	ST69 Cplx	Genbank
Escherichia coli 2-005-03_S3_C3 e200503S3C3.contig.167_1	JNPR01000001..JNPR01000168	2178	-	Genbank
Escherichia coli 2-005-03_S4_C1 e200503S4C1.contig.234_1	JNPS01000001..JNPS01000235	43	ST10 Cplx	Genbank
Escherichia coli 2-005-03_S4_C2 e200503S4C2.contig.283_1	JJLN01000001..JJLN01000284	452	-	Genbank
Escherichia coli 2-005-03_S4_C3 e200503S4C3.contig.240_1	JJLJ01000001..JJLJ01000241	452	-	Genbank
Escherichia coli 2-011-08_S1_C1 e201108S1C1.contig.124_1	JMGQ01000001..JMGQ01000125	485	-	Genbank
Escherichia coli 2-011-08_S1_C2 e201108S1C2.contig.145_1	JJMB01000001..JJMB01000146	3018	-	Genbank
Escherichia coli 2-011-08_S1_C3 e201108S1C3.contig.158_1	JNNA01000001..JNNA01000159	165	ST165 Cplx	Genbank
Escherichia coli 2-011-08_S3_C1 e201108S3C1.contig.168_1	JNNB01000001..JNNB01000169	10	ST10 Cplx	Genbank
Escherichia coli 2-011-08_S3_C2 e201108S3C2.contig.263_1	JMGU01000001..JMGU01000264	43	ST10 Cplx	Genbank
Escherichia coli 2-011-08_S3_C3 e201108S3C3.contig.161_1	JMGV01000001..JMGV01000162	10	ST10 Cplx	Genbank
Escherichia coli 2-011-08_S4_C1 e201108S4C1.contig.182_1	JNNC01000001..JNNC01000183	216	-	Genbank
Escherichia coli 2-011-08_S4_C3 e201108S4C3.contig.172_1	JNND01000001..JNND01000172	216	-	Genbank
Escherichia coli 201600.1 gec2016001.contig.52	AQFH01000001..AQFH01000053	100	ST165 Cplx	Genbank
Escherichia coli 2-052-05_S1_C1 e205205S1C1.contig.161_1	JMGR01000001..JMGR01000162	5257	-	Genbank
Escherichia coli 2-052-05_S1_C3 e205205S1C3.contig.147_1	JNNE01000001..JNNE01000148	5257	-	Genbank
Escherichia coli 2-052-05_S3_C1 e205205S3C1.contig.134_1	JNNF01000001..JNNF01000135	1286	-	Genbank
Escherichia coli 2-052-05_S3_C2 e205205S3C2.contig.99_1	JOSJ01000001..JOSJ01000100	1286	-	Genbank
Escherichia coli 2-052-05_S3_C3 e205205S3C3.contig.116_1	JNOZ01000001..JNOZ01000117	1286	-	Genbank
Escherichia coli 2-052-05_S4_C1 e205205S4C1.contig.178_1	JNNG01000001..JNNG01000178	452	-	Genbank
Escherichia coli 2-052-05_S4_C2 e205205S4C2.contig.104_1	JNPA01000001..JNPA01000105	1891	-	Genbank
Escherichia coli 2-052-05_S4_C3 e205205S4C3.contig.154_1	JNPB01000001..JNPB01000155	10	ST10 Cplx	Genbank
Escherichia coli 2-156-04_S1_C1 e215604S1C1.contig.56_1	JNPC01000001..JNPC01000057	NT	-	Genbank
Escherichia coli 2-156-04_S1_C2 e215604S1C2.contig.46_1	JNPD01000001..JNPD01000047	NT	-	Genbank
Escherichia coli 2-156-04_S1_C3 e215604S1C3.contig.188_1	JNPE01000001..JNPE01000189	5279	-	Genbank
Escherichia coli 2-156-04_S3_C1 e215604S3C1.contig.97_1	JNPF01000001..JNPF01000098	469	ST469 Cplx	Genbank
Escherichia coli 2-156-04_S3_C2 e215604S3C2.contig.86_1	JNPK01000001..JNPK01000087	3910	-	Genbank
Escherichia coli 2-156-04_S3_C3 e215604S3C3.contig.129_1	JNPG01000001..JNPG01000130	NT	-	Genbank
Escherichia coli 2-156-04_S4_C1 e215604S4C1.contig.163_1	JNPJ01000001..JNPJ01000164	216	-	Genbank
Escherichia coli 2-156-04_S4_C2 e215604S4C2.contig.214_1	JNQD01000001..JNQD01000215	401	-	Genbank
Escherichia coli 2-156-04_S4_C3 e215604S4C3.contig.182_1	JNQE01000001..JNQE01000183	216	-	Genbank
Escherichia coli 2-177-06_S1_C1 e217706S1C1.contig.171_1	JNPH01000001..JNPH01000172	5257	-	Genbank
Escherichia coli 2-177-06_S1_C2 e217706S1C2.contig.144_1	JNPL01000001..JNPL01000145	5257	-	Genbank
Escherichia coli 2-177-06_S1_C3 e217706S1C3.contig.145_1	JNPM01000001..JNPM01000146	5257	-	Genbank
Escherichia coli 2-177-06_S3_C1 e217706S3C1.contig.144_1	JNPI01000001..JNPI01000144	641	ST86 Cplx	Genbank
Escherichia coli 2-177-06_S3_C2 e217706S3C2.contig.180_1	JNQF01000001..JNQF01000181	5386	-	Genbank
Escherichia coli 2-177-06_S3_C3 e217706S3C3.contig.166_1	JOSO01000001..JOSO01000167	5386	-	Genbank
Escherichia coli 2-177-06_S4_C1 e217706S4C1.contig.101_1	JNQG01000001..JNQG01000102	117	-	Genbank
Escherichia coli 2-177-06_S4_C2 e217706S4C2.contig.112_1	JNPN01000001..JNPN01000113	2522	-	Genbank
Escherichia coli 2-177-06_S4_C3 e217706S4C3.contig.190_1	JNPZ01000001..JNPZ01000191	678	-	Genbank
Escherichia coli 2-210-07_S1_C2 e221007S1C2.contig.196_1	JNPV01000001..JNPV01000197	1415	-	Genbank
Escherichia coli 2-210-07_S1_C3 e221007S1C3.contig.168_1	JNPO01000001..JNPO01000169	1415	-	Genbank
Escherichia coli 2-210-07_S3_C1 e221007S3C1.contig.114_1	JNQH01000001..JNQH01000115	744	-	Genbank
Escherichia coli 2-210-07_S3_C2 e221007S3C2.contig.242_1	JNPX01000001..JNPX01000243	40	ST40 Cplx	Genbank
Escherichia coli 2-210-07_S3_C3 e221007S3C3.contig.340_1	JNQA01000001..JNQA01000341	378	ST10 Cplx	Genbank
Escherichia coli 2-210-07_S4_C1 e221007S4C1.contig.84_1	JNPW01000001..JNPW01000085	410	ST23 Cplx	Genbank
Escherichia coli 2-210-07_S4_C2 e221007S4C2.contig.186_1	JNQI01000001..JNQI01000187	216	-	Genbank
Escherichia coli 2-210-07_S4_C3 e221007S4C3.contig.184_1	JNQJ01000001..JNQJ01000185	216	-	Genbank
Escherichia coli 2-222-05_S1_C1 e222205S1C1.contig.107_1	JNQK01000001..JNQK01000108	5376	-	Genbank
Escherichia coli 2-222-05_S1_C2 e222205S1C2.contig.105_1	JNQL01000001..JNQL01000106	5376	-	Genbank
Escherichia coli 2-222-05_S1_C3 e222205S1C3.contig.103_1	JNQM01000001..JNQM01000104	5376	-	Genbank
Escherichia coli 2-222-05_S3_C1 e222205S3C1.contig.268_1	JOSM01000001..JOSM01000268	10	ST10 Cplx	Genbank
Escherichia coli 2-222-05_S3_C2 e222205S3C2.contig.244_1	JOSN01000001..JOSN01000234	NT	-	Genbank
Escherichia coli 2-222-05_S3_C3 e222205S3C3.contig.209_1	JNQN01000001..JNQN01000210	10	ST10 Cplx	Genbank
Escherichia coli 2-222-05_S4_C1 e222205S4C1.contig.160_1	JORR01000001..JORR01000161	216	-	Genbank
Escherichia coli 2-222-05_S4_C2 e222205S4C2.contig.170_1	JNQO01000001..JNQO01000171	484	ST168 Cplx	Genbank
Escherichia coli 2-222-05_S4_C3 e222205S4C3.contig.199_1	JOSP01000001..JOSP01000200	484	ST168 Cplx	Genbank
Escherichia coli 2-316-03_S1_C1 e231603S1C1.contig.195_1	JOMW01000001..JOMW01000196	69	ST69 Cplx	Genbank
Escherichia coli 2-316-03_S1_C2 e231603S1C2.contig.161_1	JOMX01000001..JOMX01000162	69	ST69 Cplx	Genbank
Escherichia coli 2-316-03_S3_C1 e231603S3C1.contig.150_1	JNQP01000001..JNQP01000151	761	-	Genbank
Escherichia coli 2-316-03_S3_C2 e231603S3C2.contig.115_1	JNQQ01000001..JNQQ01000116	155	ST155 Cplx	Genbank
Escherichia coli 2-316-03_S3_C3 e231603S3C3.contig.118_1	JNQR01000001..JNQR01000119	155	ST155 Cplx	Genbank
Escherichia coli 2-316-03_S4_C1 e231603S4C1.contig.153_1	JNQS01000001..JNQS01000154	394	ST394 Cplx	Genbank
Escherichia coli 2-316-03_S4_C2 e231603S4C2.contig.209_1	JNQT01000001..JNQT01000210	10	ST10 Cplx	Genbank
Escherichia coli 2-316-03_S4_C3 e231603S4C3.contig.154_1	JNQU01000001..JNQU01000155	131	ST131 Cplx	Genbank
Escherichia coli 2362-75 gec2362.assembly.9	ADUL01000001..ADUL01000083	19	-	Genbank
Escherichia coli 2-427-07_S1_C1 e242707S1C1.contig.126_1	JNQV01000001..JNQV01000126	155	ST155 Cplx	Genbank
Escherichia coli 2-427-07_S1_C2 e242707S1C2.contig.134_1	JNQW01000001..JNQW01000135	155	ST155 Cplx	Genbank
Escherichia coli 2-427-07_S1_C3 e242707S1C3.contig.144_1	JNRJ01000001..JNRJ01000145	155	ST155 Cplx	Genbank
Escherichia coli 2-427-07_S3_C1 e242707S3C1.contig.118_1	JNQX01000001..JNQX01000119	NT	-	Genbank
Escherichia coli 2-427-07_S3_C3 e242707S3C3.contig.87_1	JNQY01000001..JNQY01000088	2175	-	Genbank
Escherichia coli 2-427-07_S4_C1 e242707S4C1.contig.193_1	JNQZ01000001..JNQZ01000194	382	ST165 Cplx	Genbank
Escherichia coli 2-427-07_S4_C2 e242707S4C2.contig.140_1	JNRA01000001..JNRA01000141	131	ST131 Cplx	Genbank
Escherichia coli 2-427-07_S4_C3 e242707S4C3.contig.226_1	JOMY01000001..JOMY01000227	223	ST155 Cplx	Genbank
Escherichia coli 2-460-02_S1_C1 e246002S1C1.contig.196_1	JOSS01000001..JOSS01000197	223	ST155 Cplx	Genbank
Escherichia coli 2-460-02_S1_C2 e246002S1C2.contig.171_1	JOSU01000001..JOSU01000172	NT	-	Genbank
Escherichia coli 2-460-02_S1_C3 e246002S1C3.contig.122_1	JOMZ01000001..JOMZ01000122	131	ST131 Cplx	Genbank
Escherichia coli 2-460-02_S3_C1 e246002S3C1.contig.249_1	JNRB01000001..JNRB01000250	3281	-	Genbank
Escherichia coli 2-460-02_S3_C2 e246002S3C2.contig.292_1	JNRC01000001..JNRC01000293	3281	-	Genbank
Escherichia coli 2-460-02_S3_C3 e246002S3C3.contig.297_1	JNRD01000001..JNRD01000298	3281	-	Genbank
Escherichia coli 2-460-02_S4_C1 e246002S4C1.contig.173_1	JONA01000001..JONA01000174	43	ST10 Cplx	Genbank
Escherichia coli 2-460-02_S4_C2 e246002S4C2.contig.174_1	JNRE01000001..JNRE01000175	43	ST10 Cplx	Genbank
Escherichia coli 2-460-02_S4_C3 e246002S4C3.contig.171_1	JNRF01000001..JNRF01000172	43	ST10 Cplx	Genbank
Escherichia coli 2-474-04_S1_C1 e247404S1C1.contig.200_1	JNRG01000001..JNRG01000201	1415	-	Genbank
Escherichia coli 2-474-04_S1_C2 e247404S1C2.contig.142_1	JNRK01000001..JNRK01000143	226	ST226 Cplx	Genbank
Escherichia coli 2-474-04_S3_C1 e247404S3C1.contig.332_1	JNRH01000001..JNRH01000333	43	ST10 Cplx	Genbank
Escherichia coli 2-474-04_S3_C2 e247404S3C2.contig.247_1	JNRI01000001..JNRI01000248	43	ST10 Cplx	Genbank
Escherichia coli 2-474-04_S3_C3 e247404S3C3.contig.307_1	JNRL01000001..JNRL01000308	43	ST10 Cplx	Genbank
Escherichia coli 2-474-04_S4_C1 e247404S4C1.contig.93_1	JOSL01000001..JOSL01000094	1125	-	Genbank
Escherichia coli 2-474-04_S4_C2 e247404S4C2.contig.86_1	JNRM01000001..JNRM01000087	1125	-	Genbank
Escherichia coli 2-474-04_S4_C3 e247404S4C3.contig.92_1	JNRN01000001..JNRN01000093	1125	-	Genbank
Escherichia coli 2534-86 gec2534_86.contig.75	AFDS01000001..AFDS01000075	16	ST29 Cplx	Genbank
Escherichia coli 2719100 gec2719100.contig.35	AQFG01000001..AQFG01000036	2332	-	Genbank
Escherichia coli 2720900 gec2720900.contig.49	AQFF01000001..AQFF01000050	173	-	Genbank
Escherichia coli 2722950 gec2722950.contig.166	AQEE01000001..AQEE01000157	NT	-	Genbank
Escherichia coli 2726800 gec2726800.contig.49	AQFE01000001..AQFE01000050	5396	-	Genbank
Escherichia coli 2726950 gec2726950.contig.185	AQED01000001..AQED01000186	10	ST10 Cplx	Genbank
Escherichia coli 2729250 gec2729250.contig.148	AQEC01000001..AQEC01000148	443	ST205 Cplx	Genbank
Escherichia coli 2730350 gec2730350.contig.270	APXD01000001..APXD01000271	NT	-	Genbank
Escherichia coli 2730450 gec2730450.contig.221	APXE01000001..APXE01000222	2353	-	Genbank
Escherichia coli 2731150 gec2731150.contig.198	AQEB01000001..AQEB01000199	3931	-	Genbank
Escherichia coli 2733950 gec2733950.contig.214	APZK01000001..APZK01000215	NT	-	Genbank
Escherichia coli 2735000 gec2735000.contig.106	AQGH01000001..AQGH01000104	NT	-	Genbank
Escherichia coli 2741950 gec2741950.contig.208	APXF01000001..APXF01000209	2353	-	Genbank
Escherichia coli 2747800 gec2747800.contig.173	AQEA01000001..AQEA01000172	443	ST205 Cplx	Genbank
Escherichia coli 2749250 gec2749250.contig.178	AQDZ01000001..AQDZ01000178	NT	-	Genbank
Escherichia coli 2756500 gec2756500.contig.188	AQDY01000001..AQDY01000188	NT	-	Genbank
Escherichia coli 2762100 gec2762100.contig.197	AQDX01000001..AQDX01000198	3931	-	Genbank
Escherichia coli 2770900 gec2770900.contig.145	AQDW01000001..AQDW01000145	NT	-	Genbank
Escherichia coli 2780750 gec2780750.contig.129	AQDV01000001..AQDV01000130	1196	-	Genbank
Escherichia coli 2785200 gec2785200.contig.149	AQDU01000001..AQDU01000149	NT	-	Genbank
Escherichia coli 2788150 gec2788150.contig.184	AQDT01000001..AQDT01000185	949	-	Genbank
Escherichia coli 27A	AYQZ00000000.1	23	ST23 Cplx	Genbank
Escherichia coli 2845350 gec2845350.contig.172	AQDS01000001..AQDS01000172	NT	-	Genbank
Escherichia coli 2845650 gec2845650.contig.119	AQDR01000001..AQDR01000120	NT	-	Genbank
Escherichia coli 2846750 gec2846750.contig.194	AQGG01000001..AQGG01000194	NT	-	Genbank
Escherichia coli 2848050 gec2848050.contig.148	AQDQ01000001..AQDQ01000148	NT	-	Genbank
Escherichia coli 2850400 gec2850400.contig.117	AQDP01000001..AQDP01000117	5305	-	Genbank
Escherichia coli 2850750 gec2850750.contig.126	AQDO01000001..AQDO01000127	NT	-	Genbank
Escherichia coli 2851500 gec2851500.contig.109	AQDN01000001..AQDN01000110	NT	-	Genbank
Escherichia coli 2853500 gec2853500.contig.127	AQDM01000001..AQDM01000128	5305	-	Genbank
Escherichia coli 2854350 gec2854350.contig.162	APZL01000001..APZL01000163	5396	-	Genbank
Escherichia coli 2860050 gec2860050.contig.184	AQDL01000001..AQDL01000185	NT	-	Genbank
Escherichia coli 2860650 gec2860650.contig.175	APXG01000001..APXG01000175	NT	-	Genbank
Escherichia coli 2861200 gec2861200.contig.163	AQDK01000001..AQDK01000161	NT	-	Genbank
Escherichia coli 2862600 gec2862600.contig.169	APXH01000001..APXH01000159	96	-	Genbank
Escherichia coli 2864350 gec2864350.contig.121	APXI01000001..APXI01000121	1196	-	Genbank
Escherichia coli 2865200 gec2865200.contig.171	AQDJ01000001..AQDJ01000171	NT	-	Genbank
Escherichia coli 2866350 gec2866350.contig.140	APXJ01000001..APXJ01000136	443	ST205 Cplx	Genbank
Escherichia coli 2866450 gec2866450.contig.125	AQDI01000001..AQDI01000125	5305	-	Genbank
Escherichia coli 2866550 gec2866550.contig.132	AQDH01000001..AQDH01000130	5305	-	Genbank
Escherichia coli 2866750 gec2866750.contig.126	AQDG01000001..AQDG01000127	NT	-	Genbank
Escherichia coli 2867750 gec2867750.contig.136	AQDF01000001..AQDF01000136	5305	-	Genbank
Escherichia coli 2871950 gec2871950.contig.196	AQDE01000001..AQDE01000196	NT	-	Genbank
Escherichia coli 2872000 gec2872000.contig.208	AQDD01000001..AQDD01000202	NT	-	Genbank
Escherichia coli 2872800 gec2872800.contig.112	AQDC01000001..AQDC01000111	5305	-	Genbank
Escherichia coli 2875000 gec2875000.contig.124	AQDB01000001..AQDB01000124	NT	-	Genbank
Escherichia coli 2875150 gec2875150.contig.275	APXK01000001..APXK01000276	1201	-	Genbank
Escherichia coli 2886-75 gec288675.contig.126	AVRR01000001..AVRR01000126	11	ST11 Cplx	Genbank
Escherichia coli 3.2303 ctg1125843265933	AFAE02000001..AFAE02000035	10	ST10 Cplx	Genbank
Escherichia coli 3.2608 Contig0002	AEZS02000001..AEZS02000022	17	ST20 Cplx	Genbank
Escherichia coli 3.3884 Contig1	AFAC02000001..AFAC02000013	58	ST155 Cplx	Genbank
Escherichia coli 3.4870 gec34870.contig.493_3	AMTD01000001..AMTD01000427	11	ST11 Cplx	Genbank
Escherichia coli 3.4880 gec34880.contig.171_1	AOET01000001..AOET01000167	NT	-	Genbank
Escherichia coli 3003 ctg1125870511195	AFAF02000001..AFAF02000008	725	-	Genbank
Escherichia coli 3006 E3006.contig.346_1	AMUN01000001..AMUN01000320	5502	-	Genbank
Escherichia coli 3-020-07_S1_C1 e302007S1C1.contig.176_1	JNRO01000001..JNRO01000177	1139	-	Genbank
Escherichia coli 3-020-07_S1_C2 e302007S1C2.contig.120_1	JNRP01000001..JNRP01000121	1139	-	Genbank
Escherichia coli 3-020-07_S1_C3 e302007S1C3.contig.154_1	JNRQ01000001..JNRQ01000155	1139	-	Genbank
Escherichia coli 3-020-07_S3_C1 e302007S3C1.contig.191_1	JNRR01000001..JNRR01000192	43	ST10 Cplx	Genbank
Escherichia coli 3-020-07_S3_C2 e302007S3C2.contig.249_1	JONB01000001..JONB01000249	43	ST10 Cplx	Genbank
Escherichia coli 3-020-07_S4_C1 e302007S4C1.contig.128_1	JONC01000001..JONC01000128	NT	-	Genbank
Escherichia coli 3-020-07_S4_C2 e302007S4C2.contig.188_1	JNRS01000001..JNRS01000189	5617	-	Genbank
Escherichia coli 3-020-07_S4_C3 e302007S4C3.contig.161_1	JNRT01000001..JNRT01000162	5617	-	Genbank
Escherichia coli 3030-1	AFDT01000001..AFDT01000090	154	-	Genbank
Escherichia coli 3-073-06_S1_C1 e307306S1C1.contig.81_1	JNRU01000001..JNRU01000082	4554	-	Genbank
Escherichia coli 3-073-06_S1_C2 e307306S1C2.contig.273_1	JNRV01000001..JNRV01000274	10	ST10 Cplx	Genbank
Escherichia coli 3-073-06_S3_C1 e307306S3C1.contig.222_1	JNRW01000001..JNRW01000223	43	ST10 Cplx	Genbank
Escherichia coli 3-073-06_S3_C2 e307306S3C2.contig.225_1	JNRX01000001..JNRX01000226	43	ST10 Cplx	Genbank
Escherichia coli 3-073-06_S4_C1 e307306S4C1.contig.251_1	JNMT01000001..JNMT01000252	1178	-	Genbank
Escherichia coli 3-073-06_S4_C2 e307306S4C2.contig.111_1	JNRY01000001..JNRY01000112	5474	-	Genbank
Escherichia coli 3-073-06_S4_C3 e307306S4C3.contig.224_1	JNRZ01000001..JNRZ01000225	1178	-	Genbank
Escherichia coli 3-105-05_S1_C1 e310505S1C1.contig.187_1	JNLZ01000001..JNLZ01000188	757	-	Genbank
Escherichia coli 3-105-05_S1_C2 e310505S1C2.contig.228_1	JNSA01000001..JNSA01000229	206	ST206 Cplx	Genbank
Escherichia coli 3-105-05_S1_C3 e310505S1C3.contig.186_1	JNSB01000001..JNSB01000187	NT	-	Genbank
Escherichia coli 3-105-05_S3_C1 e310505S3C1.contig.181_1	JNMA01000001..JNMA01000182	10	ST10 Cplx	Genbank
Escherichia coli 3-105-05_S3_C2 e310505S3C2.contig.178_1	JNMB01000001..JNMB01000179	10	ST10 Cplx	Genbank
Escherichia coli 3-105-05_S3_C3 e310505S3C3.contig.199_1	JNMO01000001..JNMO01000200	2172	-	Genbank
Escherichia coli 3-105-05_S4_C1 e310505S4C1.contig.84_1	JNML01000001..JNML01000085	227	ST10 Cplx	Genbank
Escherichia coli 3-105-05_S4_C2 e310505S4C2.contig.114_1	JNMC01000001..JNMC01000115	12	ST12 Cplx	Genbank
Escherichia coli 3-105-05_S4_C3 e310505S4C3.contig.241_1	JNMD01000001..JNMD01000242	1114	-	Genbank
Escherichia coli 320	AYQM00000000.1	10	ST10 Cplx	Genbank
Escherichia coli 3-267-03_S1_C1 e326703S1C1.contig.235_1	JNMP01000001..JNMP01000236	NT	-	Genbank
Escherichia coli 3-267-03_S1_C2 e326703S1C2.contig.86_1	JNMN01000001..JNMN01000087	3056	-	Genbank
Escherichia coli 3-267-03_S1_C3 e326703S1C3.contig.218_1	JNME01000001..JNME01000219	5251	-	Genbank
Escherichia coli 3-267-03_S3_C1 e326703S3C1.contig.179_1	JNMF01000001..JNMF01000180	10	ST10 Cplx	Genbank
Escherichia coli 3-267-03_S3_C2 e326703S3C2.contig.78_1	JNMM01000001..JNMM01000079	101	ST101 Cplx	Genbank
Escherichia coli 3-267-03_S4_C1 e326703S4C1.contig.237_1	JOND01000001..JOND01000238	223	ST155 Cplx	Genbank
Escherichia coli 3-267-03_S4_C2 e326703S4C2.contig.184_1	JNMR01000001..JNMR01000185	5285	-	Genbank
Escherichia coli 328	AYQS00000000.1	69	ST69 Cplx	Genbank
Escherichia coli 3-373-03_S1_C1 e337303S1C1.contig.151_1	JNMV01000001..JNMV01000152	5293	-	Genbank
Escherichia coli 3-373-03_S1_C2 e337303S1C2.contig.177_1	JNMI01000001..JNMI01000178	NT	-	Genbank
Escherichia coli 3-373-03_S1_C3 e337303S1C3.contig.170_1	JNMU01000001..JNMU01000171	5293	-	Genbank
Escherichia coli 3-373-03_S3_C1 e337303S3C1.contig.116_1	JNMG01000001..JNMG01000117	48	ST10 Cplx	Genbank
Escherichia coli 3-373-03_S3_C2 e337303S3C2.contig.81_1	JNMQ01000001..JNMQ01000082	10	ST10 Cplx	Genbank
Escherichia coli 3-373-03_S3_C3 e337303S3C3.contig.105_1	JNMH01000001..JNMH01000106	10	ST10 Cplx	Genbank
Escherichia coli 3-373-03_S4_C1 e337303S4C1.contig.170_1	JNMW01000001..JNMW01000171	10	ST10 Cplx	Genbank
Escherichia coli 3-373-03_S4_C2 e337303S4C2.contig.202_1	JNMS01000001..JNMS01000203	10	ST10 Cplx	Genbank
Escherichia coli 3-373-03_S4_C3 e337303S4C3.contig.179_1	JOQL01000001..JOQL01000180	10	ST10 Cplx	Genbank
Escherichia coli 3431 gec3431.assembly.9	ADUM01000001..ADUM01000127	378	ST10 Cplx	Genbank
Escherichia coli 3-475-03_S1_C1 e347503S1C1.contig.193_1	JNMJ01000001..JNMJ01000194	5372	-	Genbank
Escherichia coli 3-475-03_S1_C2 e347503S1C2.contig.174_1	JOQC01000001..JOQC01000175	200	ST40 Cplx	Genbank
Escherichia coli 3-475-03_S3_C1 e347503S3C1.contig.144_1	JOQD01000001..JOQD01000145	328	ST278 Cplx	Genbank
Escherichia coli 3-475-03_S3_C2 e347503S3C2.contig.202_1	JOQE01000001..JOQE01000203	29	ST29 Cplx	Genbank
Escherichia coli 3-475-03_S4_C1 e347503S4C1.contig.104_1	JNMK01000001..JNMK01000105	10	ST10 Cplx	Genbank
Escherichia coli 3-475-03_S4_C2 e347503S4C2.contig.169_1	JNMX01000001..JNMX01000170	757	-	Genbank
Escherichia coli 38.16	AYQL00000000.1	58	ST155 Cplx	Genbank
Escherichia coli 38.27	AYQO00000000.1	10	ST10 Cplx	Genbank
Escherichia coli 38.34	AYQP00000000.1	10	ST10 Cplx	Genbank
Escherichia coli 38.52	AYQH00000000.1	117	-	Genbank
Escherichia coli 4.0522 ctg1125528701409	AEZU02000001..AEZU02000109	16	ST29 Cplx	Genbank
Escherichia coli 4.0967 Contig0013	AFAA02000001..AFAA02000041	20	ST20 Cplx	Genbank
Escherichia coli 4-203-08_S1_C1 e420308S1C1.contig.172_1	JNMY01000001..JNMY01000173	10	ST10 Cplx	Genbank
Escherichia coli 4-203-08_S1_C2 e420308S1C2.contig.182_1	JOQF01000001..JOQF01000183	10	ST10 Cplx	Genbank
Escherichia coli 4-203-08_S1_C3 e420308S1C3.contig.166_1	JOQG01000001..JOQG01000167	10	ST10 Cplx	Genbank
Escherichia coli 4-203-08_S3_C1 e420308S3C1.contig.170_1	JOQJ01000001..JOQJ01000171	5318	-	Genbank
Escherichia coli 4-203-08_S3_C2 e420308S3C2.contig.104_1	JOQK01000001..JOQK01000105	5518	-	Genbank
Escherichia coli 4-203-08_S3_C3 e420308S3C3.contig.115_1	JOQH01000001..JOQH01000116	5518	-	Genbank
Escherichia coli 4-203-08_S4_C2 e420308S4C2.contig.171_1	JOQI01000001..JOQI01000172	5318	-	Genbank
Escherichia coli 4-203-08_S4_C3 e420308S4C3.contig.179_1	JNMZ01000001..JNMZ01000180	5318	-	Genbank
Escherichia coli 435	AYQT00000000.1	68	-	Genbank
Escherichia coli 4541-1 4541_1_1	JDWU00000000.1	216	-	Genbank
Escherichia coli 4552-1 4552_1_1	JDWT00000000.1	NT	-	Genbank
Escherichia coli 5.0588 Contig0002	AEZK02000001..AEZK02000031	2385	-	Genbank
Escherichia coli 5.0959 Contig0003	AEZX02000001..AEZX02000029	655	-	Genbank
Escherichia coli 5.2239 gec52239.contig.484_1	AMTE01000001..AMTE01000432	11	ST11 Cplx	Genbank
Escherichia coli 5-172-05_S1_C1 e517205S1C1.contig.67_1	JOQX01000001..JOQX01000068	NT	-	Genbank
Escherichia coli 5-172-05_S1_C3 e517205S1C3.contig.184_1	JOQS01000001..JOQS01000185	1421	-	Genbank
Escherichia coli 5-172-05_S3_C1 e517205S3C1.contig.180_1	JOQQ01000001..JOQQ01000181	5439	-	Genbank
Escherichia coli 5-172-05_S3_C3 e517205S3C3.contig.192_1	JOQO01000001..JOQO01000193	206	ST206 Cplx	Genbank
Escherichia coli 5-172-05_S4_C1 e517205S4C1.contig.112_1	JOQP01000001..JOQP01000113	10	ST10 Cplx	Genbank
Escherichia coli 5-172-05_S4_C2 e517205S4C2.contig.108_1	JOQN01000001..JOQN01000109	10	ST10 Cplx	Genbank
Escherichia coli 5-172-05_S4_C3 e517205S4C3.contig.109_1	JOQT01000001..JOQT01000110	10	ST10 Cplx	Genbank
Escherichia coli 536	CP000247	127	-	Genbank
Escherichia coli 53638 gcontig_1105238512149	AAKB02000001..AAKB02000002	6	-	Genbank
Escherichia coli 5-366-08_S1_C1 e536608S1C1.contig.122_1	JOQU01000001..JOQU01000123	2914	-	Genbank
Escherichia coli 5-366-08_S1_C3 e536608S1C3.contig.108_1	JONE01000001..JONE01000109	2914	-	Genbank
Escherichia coli 5-366-08_S3_C1 e536608S3C1.contig.123_1	JOQY01000001..JOQY01000124	2	-	Genbank
Escherichia coli 5-366-08_S3_C2 e536608S3C2.contig.173_1	JOQW01000001..JOQW01000174	5285	-	Genbank
Escherichia coli 5-366-08_S3_C3 e536608S3C3.contig.101_1	JOQV01000001..JOQV01000102	2	-	Genbank
Escherichia coli 5-366-08_S4_C1 e536608S4C1.contig.216_1	JOST01000001..JOST01000217	5793	-	Genbank
Escherichia coli 5-366-08_S4_C2 e536608S4C2.contig.224_1	JOQM01000001..JOQM01000225	5348	-	Genbank
Escherichia coli 53A	AYQQ00000000.1	10	ST10 Cplx	Genbank
Escherichia coli 53C	AYRA00000000.1	117	-	Genbank
Escherichia coli 541-1 contig00444	AJWR01000001..AJWR01000383	603	-	Genbank
Escherichia coli 541-15 contig00418	AJWQ01000001..AJWQ01000301	401	-	Genbank
Escherichia coli 5412 E5412.contig.473_1	AMUJ01000001..AMUJ01000416	11	ST11 Cplx	Genbank
Escherichia coli 55989	CU928145	678	-	Genbank
Escherichia coli 576-1 contig00618	AJWS01000001..AJWS01000507	NT	-	Genbank
Escherichia coli 5905 E5905.contig.407_4	AMUG01000001..AMUG01000401	335	ST11 Cplx	Genbank
Escherichia coli 597	AYQU00000000.1	95	ST95 Cplx	Genbank
Escherichia coli 6.0172 gec60172.contig.481_1	AMTF01000001..AMTF01000432	11	ST11 Cplx	Genbank
Escherichia coli 606	AYQV00000000.1	NT	-	Genbank
Escherichia coli 6-175-07_S1_C1 e617507S1C1.contig.101_1	JOQR01000001..JOQR01000102	583	ST122 Cplx	Genbank
Escherichia coli 6-175-07_S1_C2 e617507S1C2.contig.145_1	JOMS01000001..JOMS01000145	38	ST38 Cplx	Genbank
Escherichia coli 6-175-07_S1_C3 e617507S1C3.contig.126_1	JORL01000001..JORL01000127	38	ST38 Cplx	Genbank
Escherichia coli 6-175-07_S3_C1 e617507S3C1.contig.105_1	JOQZ01000001..JOQZ01000106	827	-	Genbank
Escherichia coli 6-175-07_S3_C2 e617507S3C2.contig.123_1	JONF01000001..JONF01000123	827	-	Genbank
Escherichia coli 6-175-07_S3_C3 e617507S3C3.contig.105_1	JORA01000001..JORA01000106	827	-	Genbank
Escherichia coli 6-175-07_S4_C1 e617507S4C1.contig.124_1	JORB01000001..JORB01000125	5518	-	Genbank
Escherichia coli 6-175-07_S4_C2 e617507S4C2.contig.102_1	JORC01000001..JORC01000103	5518	-	Genbank
Escherichia coli 6-175-07_S4_C3 e617507S4C3.contig.132_1	JORK01000001..JORK01000133	5518	-	Genbank
Escherichia coli 6-319-05_S1_C1 e631905S1C1.contig.220_1	JORT01000001..JORT01000221	443	ST205 Cplx	Genbank
Escherichia coli 6-319-05_S1_C2 e631905S1C2.contig.191_1	JORD01000001..JORD01000192	NT	-	Genbank
Escherichia coli 6-319-05_S1_C3 e631905S1C3.contig.219_1	JORE01000001..JORE01000220	443	ST205 Cplx	Genbank
Escherichia coli 6-319-05_S3_C1 e631905S3C1.contig.112_1	JORF01000001..JORF01000113	827	-	Genbank
Escherichia coli 6-319-05_S3_C2 e631905S3C2.contig.128_1	JORG01000001..JORG01000129	827	-	Genbank
Escherichia coli 6-319-05_S3_C3 e631905S3C3.contig.102_1	JORM01000001..JORM01000103	827	-	Genbank
Escherichia coli 6-319-05_S4_C2 e631905S4C2.contig.208_1	JORH01000001..JORH01000208	5294	-	Genbank
Escherichia coli 6-319-05_S4_C3 e631905S4C3.contig.438_1	JORJ01000001..JORJ01000433	5294	-	Genbank
Escherichia coli 6-537-08_S1_C1 e653708S1C1.contig.152_1	JORI01000001..JORI01000153	2332	-	Genbank
Escherichia coli 6-537-08_S1_C2 e653708S1C2.contig.159_1	JOSC01000001..JOSC01000160	2332	-	Genbank
Escherichia coli 6-537-08_S1_C3 e653708S1C3.contig.166_1	JOSF01000001..JOSF01000167	2332	-	Genbank
Escherichia coli 6-537-08_S3_C1 e653708S3C1.contig.96_1	JORP01000001..JORP01000097	192	-	Genbank
Escherichia coli 6-537-08_S3_C2 e653708S3C2.contig.97_1	JORX01000001..JORX01000098	192	-	Genbank
Escherichia coli 6-537-08_S3_C3 e653708S3C3.contig.98_1	JORQ01000001..JORQ01000099	192	-	Genbank
Escherichia coli 6-537-08_S4_C1 e653708S4C1.contig.128_1	JORS01000001..JORS01000129	5518	-	Genbank
Escherichia coli 6-537-08_S4_C2 e653708S4C2.contig.111_1	JOSG01000001..JOSG01000112	5518	-	Genbank
Escherichia coli 668	AYQW00000000.1	648	ST648 Cplx	Genbank
Escherichia coli 681	AYQN00000000.1	10	ST10 Cplx	Genbank
Escherichia coli 7.1982 gec71982.contig.143_1	AOEP01000001..AOEP01000141	11	ST11 Cplx	Genbank
Escherichia coli 7-233-03_S1_C2 e723303S1C2.contig.83_1	JORN01000001..JORN01000084	5334	-	Genbank
Escherichia coli 7-233-03_S1_C3 e723303S1C3.contig.71_1	JORU01000001..JORU01000072	5334	-	Genbank
Escherichia coli 7-233-03_S3_C1 e723303S3C1.contig.139_1	JORO01000001..JORO01000140	10	ST10 Cplx	Genbank
Escherichia coli 7-233-03_S3_C2 e723303S3C2.contig.203_1	JORY01000001..JORY01000204	1178	-	Genbank
Escherichia coli 7-233-03_S3_C3 e723303S3C3.contig.171_1	JORV01000001..JORV01000172	10	ST10 Cplx	Genbank
Escherichia coli 7-233-03_S4_C1 e723303S4C1.contig.89_1	JOSD01000001..JOSD01000090	10	ST10 Cplx	Genbank
Escherichia coli 7-233-03_S4_C2 e723303S4C2.contig.82_1	JORW01000001..JORW01000083	4995	-	Genbank
Escherichia coli 7-233-03_S4_C3 e723303S4C3.contig.114_1	JOSE01000001..JOSE01000115	10	ST10 Cplx	Genbank
Escherichia coli 75 contig00338	AJWT01000001..AJWT01000254	10	ST10 Cplx	Genbank
Escherichia coli 7996-1 7996_1_1	JDWS00000000.1	127	-	Genbank
Escherichia coli 8.0416 80416_CA.contig.245	AMTN01000001..AMTN01000245	11	ST11 Cplx	Genbank
Escherichia coli 8.0566 gec80566.contig.183_1	AMTG01000001..AMTG01000157	10	ST10 Cplx	Genbank
Escherichia coli 8.0569 gec80569.contig.153_1	AMTH01000001..AMTH01000143	10	ST10 Cplx	Genbank
Escherichia coli 8.0586 gec80586.contig.750_1	AMTI01000001..AMTI01000538	11	ST11 Cplx	Genbank
Escherichia coli 8.2524 gec82524.contig.495_2	AMTJ01000001..AMTJ01000437	11	ST11 Cplx	Genbank
Escherichia coli 83972 contig00202	ACGN01000001..ACGN01000159	73	ST73 Cplx	Genbank
Escherichia coli 8-415-05_S1_C1 e841505S1C1.contig.131_1	JORZ01000001..JORZ01000132	226	ST226 Cplx	Genbank
Escherichia coli 8-415-05_S1_C2 e841505S1C2.contig.154_1	JOSQ01000001..JOSQ01000155	226	ST226 Cplx	Genbank
Escherichia coli 8-415-05_S3_C1 e841505S3C1.contig.153_1	JOSB01000001..JOSB01000154	73	ST73 Cplx	Genbank
Escherichia coli 8-415-05_S3_C2 e841505S3C2.contig.133_1	JOSI01000001..JOSI01000134	73	ST73 Cplx	Genbank
Escherichia coli 8-415-05_S3_C3 e841505S3C3.contig.151_1	JOSA01000001..JOSA01000152	73	ST73 Cplx	Genbank
Escherichia coli 8-415-05_S4_C1 e841505S4C1.contig.140_1	JOMT01000001..JOMT01000141	73	ST73 Cplx	Genbank
Escherichia coli 8-415-05_S4_C2 e841505S4C2.contig.127_1	JOMU01000001..JOMU01000128	NT	-	Genbank
Escherichia coli 8-415-05_S4_C3 e841505S4C3.contig.138_1	JOMV01000001..JOMV01000139	73	ST73 Cplx	Genbank
Escherichia coli 85B	AYQR00000000.1	10	ST10 Cplx	Genbank
Escherichia coli 8624	AIAK00000000.1	11	ST11 Cplx	Genbank
Escherichia coli 87A	AYRB00000000.1	115	-	Genbank
Escherichia coli 88.0221 gec880221.contig.530_1	AMTM01000001..AMTM01000422	11	ST11 Cplx	Genbank
Escherichia coli 88.1042 gec881042.contig.518_1	ANLI01000001..ANLI01000427	11	ST11 Cplx	Genbank
Escherichia coli 88.1467 gec881467.contig.613_1	ANLH01000001..ANLH01000519	11	ST11 Cplx	Genbank
Escherichia coli 89.0511 gec890511.contig.603_1	ANLJ01000001..ANLJ01000508	11	ST11 Cplx	Genbank
Escherichia coli 897	AYQF00000000.1	117	-	Genbank
Escherichia coli 9.0111 ctg1125855384389	AEZZ02000001..AEZZ02000090	811	-	Genbank
Escherichia coli 9.1649	GL878179.1	998	-	Genbank
Escherichia coli 90.0039 gec900039.contig.451_3	ANLL01000001..ANLL01000445	11	ST11 Cplx	Genbank
Escherichia coli 90.0091 gec900091.contig.674_1	ANLK01000001..ANLK01000580	5324	-	Genbank
Escherichia coli 90.2281 gec902281.contig.476_1	ANLM01000001..ANLM01000417	11	ST11 Cplx	Genbank
Escherichia coli 900105 (10e) Contig1661271617	AFAI02000001..AFAI02000051	21	ST29 Cplx	Genbank
Escherichia coli 907357 E_coliHMPREF1592-1.0_Cont561.1	AXUH01000001..AXUH01000187	2599	-	Genbank
Escherichia coli 907391 E_coliHMPREF1593-1.0_Cont778.1	AXTC01000001..AXTC01000182	73	ST73 Cplx	Genbank
Escherichia coli 907446 E_coliHMPREF1594-1.0_Cont849.1	AXTD01000001..AXTD01000198	131	ST131 Cplx	Genbank
Escherichia coli 907672 E_coliHMPREF1595-1.0_Cont386.1	AXTE01000001..AXTE01000110	354	ST354 Cplx	Genbank
Escherichia coli 907700 E_coliHMPREF1596-1.0_Cont609.2	AXTF01000001..AXTF01000176	131	ST131 Cplx	Genbank
Escherichia coli 907701 E_coliHMPREF1597-1.0_Cont842.2	AXTG01000001..AXTG01000249	131	ST131 Cplx	Genbank
Escherichia coli 907710 E_coliHMPREF1598-1.0_Cont1037.6	AXTH01000001..AXTH01000262	162	ST469 Cplx	Genbank
Escherichia coli 907713 E_coliHMPREF1599-1.0_Cont956.2	AXUI01000001..AXUI01000258	69	ST69 Cplx	Genbank
Escherichia coli 907715 E_coliHMPREF1600-1.0_Cont970.2	AXTI01000001..AXTI01000234	69	ST69 Cplx	Genbank
Escherichia coli 907779 E_coliHMPREF1601-1.0_Cont654.1	AXUJ01000001..AXUJ01000191	131	ST131 Cplx	Genbank
Escherichia coli 907889 E_coliHMPREF1602-1.0_Cont1466.3	AXTJ01000001..AXTJ01000365	405	ST405 Cplx	Genbank
Escherichia coli 907892 E_coliHMPREF1603-1.0_Cont1132.2	AXTK01000001..AXTK01000263	73	ST73 Cplx	Genbank
Escherichia coli 908519 E_coliHMPREF1604-1.0_Cont721.1	AXTL01000001..AXTL01000235	420	-	Genbank
Escherichia coli 908521 E_coliHMPREF1605-1.0_Cont813.2	AXTM01000001..AXTM01000224	69	ST69 Cplx	Genbank
Escherichia coli 908522 E_coliHMPREF1606-1.0_Cont1166.1	AXTN01000001..AXTN01000257	69	ST69 Cplx	Genbank
Escherichia coli 908524 E_coliHMPREF1607-1.0_Cont621.1	AXTO01000001..AXTO01000188	131	ST131 Cplx	Genbank
Escherichia coli 908525 E_coliHMPREF1608-1.0_Cont5695.3	AXTP01000001..AXTP01000377	354	ST354 Cplx	Genbank
Escherichia coli 908541 E_coliHMPREF1609-1.0_Cont1142.5	AXTQ01000001..AXTQ01000309	58	ST155 Cplx	Genbank
Escherichia coli 908555 E_coliHMPREF1610-1.0_Cont733.5	AXTR01000001..AXTR01000176	410	ST23 Cplx	Genbank
Escherichia coli 908573 E_coliHMPREF1611-1.0_Cont1073.9	AXTS01000001..AXTS01000302	68	-	Genbank
Escherichia coli 908585 E_coliHMPREF1612-1.0_Cont1318.9	AXTT01000001..AXTT01000293	69	ST69 Cplx	Genbank
Escherichia coli 908616 E_coliHMPREF1613-1.0_Cont1347.1	AXTU01000001..AXTU01000289	69	ST69 Cplx	Genbank
Escherichia coli 908624 E_coliHMPREF1614-1.0_Cont986.4	AXTV01000001..AXTV01000270	131	ST131 Cplx	Genbank
Escherichia coli 908632 E_coliHMPREF1615-1.0_Cont674.2	AXTW01000001..AXTW01000232	131	ST131 Cplx	Genbank
Escherichia coli 908658 E_coliHMPREF1616-1.0_Cont925.5	AXTX01000001..AXTX01000241	617	ST10 Cplx	Genbank
Escherichia coli 908675 E_coliHMPREF1617-1.0_Cont957.3	AXTY01000001..AXTY01000239	95	ST95 Cplx	Genbank
Escherichia coli 908691 E_coliHMPREF1618-1.0_Cont763.5	AXTZ01000001..AXTZ01000195	131	ST131 Cplx	Genbank
Escherichia coli 909945-2 E_coliHMPREF1620-1.0_Cont1073.1	AXUK01000001..AXUK01000267	216	-	Genbank
Escherichia coli 910096-2 E_coliHMPREF1623-1.0_Cont621.1	AXUA01000001..AXUA01000202	NT	-	Genbank
Escherichia coli 93.0055 gec930055.contig.462_2	ANLN01000001..ANLN01000412	11	ST11 Cplx	Genbank
Escherichia coli 93.0056 gec930056.contig.442_2	ANLO01000001..ANLO01000384	11	ST11 Cplx	Genbank
Escherichia coli 93.0624 Contig573958657	AEZT02000001..AEZT02000049	17	ST20 Cplx	Genbank
Escherichia coli 93-001 93_001.contig.537_1	AKLB01000001..AKLB01000479	11	ST11 Cplx	Genbank
Escherichia coli 94.0618 gec940618.contig.424_1	ANLP01000001..ANLP01000391	11	ST11 Cplx	Genbank
Escherichia coli 95.0083 gec950083.contig.215_1	AOEU01000001..AOEU01000208	11	ST11 Cplx	Genbank
Escherichia coli 95.0183 gec950183.contig.545_1	ANLQ01000001..ANLQ01000588	11	ST11 Cplx	Genbank
Escherichia coli 95.0941	GL877993.1	58	ST155 Cplx	Genbank
Escherichia coli 95.0943 gec950943.contig.469_1	ANLS01000001..ANLS01000462	11	ST11 Cplx	Genbank
Escherichia coli 95.1288 gec951288.contig.699_1	ANLR01000001..ANLR01000682	11	ST11 Cplx	Genbank
Escherichia coli 95NR1 contig99000000	AVDU01000001..AVDU01000181	294	ST29 Cplx	Genbank
Escherichia coli 96.0107 gec960107.contig.465_1	ANLY01000001..ANLY01000369	11	ST11 Cplx	Genbank
Escherichia coli 96.0109 gec960109.contig.739_2	ANLX01000001..ANLX01000632	11	ST11 Cplx	Genbank
Escherichia coli 96.0427 gec960427.contig.650_2	ANLU01000001..ANLU01000542	11	ST11 Cplx	Genbank
Escherichia coli 96.0428 gec960428.contig.408_1	ANLT01000001..ANLT01000345	11	ST11 Cplx	Genbank
Escherichia coli 96.0497 Contig185	AEZQ02000001..AEZQ02000013	442	-	Genbank
Escherichia coli 96.0932 gec960932.contig.523_1	ANLW01000001..ANLW01000445	11	ST11 Cplx	Genbank
Escherichia coli 96.0939 gec960939.contig.603_1	ANLV01000001..ANLV01000442	11	ST11 Cplx	Genbank
Escherichia coli 96.154 Contig0002	AEZW02000001..AEZW02000003	223	ST155 Cplx	Genbank
Escherichia coli 97.0003 gec970003.contig.115_1	ANLZ01000001..ANLZ01000126	11	ST11 Cplx	Genbank
Escherichia coli 97.0007 gec970007.contig.283	ANMC01000001..ANMC01000284	11	ST11 Cplx	Genbank
Escherichia coli 97.0010 gec970010.contig.868_2	ANMB01000001..ANMB01000757	11	ST11 Cplx	Genbank
Escherichia coli 97.0246 ctg1127147154568	AEZJ02000001..AEZJ02000049	342	-	Genbank
Escherichia coli 97.0259 Contig1340738014	AEZL02000001..AEZL02000036	973	-	Genbank
Escherichia coli 97.0264	GL878029.1	58	ST155 Cplx	Genbank
Escherichia coli 97.1742 gec971742.contig.357_1	ANMA01000001..ANMA01000346	11	ST11 Cplx	Genbank
Escherichia coli 99.0670 gec990670.contig.130_1	AOEV01000001..AOEV01000131	11	ST11 Cplx	Genbank
Escherichia coli 99.0672 gec990672.contig.572_1	ANMD01000001..ANMD01000535	11	ST11 Cplx	Genbank
Escherichia coli 99.0678 990678_CA.contig.148	ANME01000001..ANME01000149	11	ST11 Cplx	Genbank
Escherichia coli 99.0713 gec990713.contig.120	ANMF01000001..ANMF01000121	11	ST11 Cplx	Genbank
Escherichia coli 99.0741 Contig1340725834	AEZR02000001..AEZR02000084	33	-	Genbank
Escherichia coli 99.0814 gec990814.contig.212_1	AODY01000001..AODY01000212	11	ST11 Cplx	Genbank
Escherichia coli 99.0815 gec990815.contig.297_1	AODZ01000001..AODZ01000297	11	ST11 Cplx	Genbank
Escherichia coli 99.0816 gec990816.contig.225_1	AOEA01000001..AOEA01000226	11	ST11 Cplx	Genbank
Escherichia coli 99.0839 gec990839.contig.182_1	AOEB01000001..AOEB01000182	11	ST11 Cplx	Genbank
Escherichia coli 99.0848 gec990848.contig.230_1	AOEC01000001..AOEC01000230	11	ST11 Cplx	Genbank
Escherichia coli 99.1753 gec991753.contig.257_1	AOED01000001..AOED01000254	11	ST11 Cplx	Genbank
Escherichia coli 99.1762 gec991762.contig.138_1	AOER01000001..AOER01000139	11	ST11 Cplx	Genbank
Escherichia coli 99.1775 gec991775.contig.293_1	AOEE01000001..AOEE01000279	11	ST11 Cplx	Genbank
Escherichia coli 99.1781 gec991781.contig.162_1	AOEQ01000001..AOEQ01000158	11	ST11 Cplx	Genbank
Escherichia coli 99.1793 gec991793.contig.196_1	AOEF01000001..AOEF01000185	11	ST11 Cplx	Genbank
Escherichia coli 99.1805 gec991805.contig.306_1	AOEG01000001..AOEG01000306	11	ST11 Cplx	Genbank
Escherichia coli 9B	AYQY00000000.1	93	ST168 Cplx	Genbank
Escherichia coli A25922R E_coliHMPREF1621-1.0_Cont877.3	AXUB01000001..AXUB01000220	73	ST73 Cplx	Genbank
Escherichia coli A35218R E_coliHMPREF1622-1.0_Cont733.8	AXUC01000001..AXUC01000179	127	-	Genbank
Escherichia coli AA86 53_3	AFET01000001..AFET01000005	91	-	Genbank
Escherichia coli AB42410445-isolate1	ATOD00000000.1	70	-	Genbank
Escherichia coli AB42554418-isolate1	ATOC00000000.1	70	-	Genbank
Escherichia coli AB42602061-isolate1	ATOB00000000.1	70	-	Genbank
Escherichia coli AB43739056-isolate1	ATOA00000000.1	69	ST69 Cplx	Genbank
Escherichia coli ABU 83972	CP001671..CP001833	73	ST73 Cplx	Genbank
Escherichia coli AD30 1.ECAD30.1_117	AMSK01000001..AMSK01000117	NT	-	Genbank
Escherichia coli AI27 1.ECAI27.1_262	AJPQ01000001..AJPQ01000262	4038	-	Genbank
Escherichia coli APEC O1	CP000468..DQ517526	95	ST95 Cplx	Genbank
Escherichia coli APEC O78	CP004009	23	ST23 Cplx	Genbank
Escherichia coli ARS4.2123 ARS42123.contig.240_1	AMUL01000001..AMUL01000245	725	-	Genbank
Escherichia coli ATCC 25922 ATCC_contig_135	ASHD01000001..ASHD01000116	73	ST73 Cplx	Genbank
Escherichia coli ATCC 35150 Cont99	AWXM02000001..AWXM02000358	32	ST32 Cplx	Genbank
Escherichia coli ATCC 700728 gec700728.contig.131_1	AOEH01000001..AOEH01000132	11	ST11 Cplx	Genbank
Escherichia coli ATCC 8739	CP000946	3021	-	Genbank
Escherichia coli ATCC BAA-2192 Cont99	AYGW02000001..AYGW02000330	11	ST11 Cplx	Genbank
Escherichia coli ATCC BAA-2193 Cont99	AYMX02000001..AYMX02000451	723	-	Genbank
Escherichia coli ATCC BAA-2196 Cont99	AYOF01000001..AYOF01000503	21	ST29 Cplx	Genbank
Escherichia coli ATCC BAA-2209 Cont999	AZBZ01000001..AZBZ01001763	16	ST29 Cplx	Genbank
Escherichia coli ATCC BAA-2215 Cont99	AZCA01000001..AZCA01000373	17	ST20 Cplx	Genbank
Escherichia coli ATCC BAA-2219 Cont99	AYRW01000001..AYRW01000495	655	-	Genbank
Escherichia coli B str. REL606	CP000819	93	ST168 Cplx	Genbank
Escherichia coli B088 genomic scaffold supercont1.37	GG749125..GG749161	2777	-	Genbank
Escherichia coli B093 cont1.186	AEXF01000001..AEXF01000186	457	-	Genbank
Escherichia coli B102 gecB102.contig.126	AVQS01000001..AVQS01000126	11	ST11 Cplx	Genbank
Escherichia coli B103 gecB103.contig.126	AVRS01000001..AVRS01000127	11	ST11 Cplx	Genbank
Escherichia coli B104 gecB104.contig.123	AVRT01000001..AVRT01000123	11	ST11 Cplx	Genbank
Escherichia coli B105 gecB105.contig.129	AVRU01000001..AVRU01000130	11	ST11 Cplx	Genbank
Escherichia coli B106 gecB106.contig.120	AVRV01000001..AVRV01000120	11	ST11 Cplx	Genbank
Escherichia coli B107 gecB107.contig.53	AVQT01000001..AVQT01000053	11	ST11 Cplx	Genbank
Escherichia coli B108 gecB108.contig.131	AVRW01000001..AVRW01000122	11	ST11 Cplx	Genbank
Escherichia coli B109 gecB109.contig.125	AVRX01000001..AVRX01000121	11	ST11 Cplx	Genbank
Escherichia coli B112 gecB112.contig.125	AVRY01000001..AVRY01000126	11	ST11 Cplx	Genbank
Escherichia coli B113 gecB113.contig.138	AVRZ01000001..AVRZ01000139	11	ST11 Cplx	Genbank
Escherichia coli B114 gecB114.contig.126	AVSA01000001..AVSA01000126	11	ST11 Cplx	Genbank
Escherichia coli B15 gecB15.contig.120	AVSB01000001..AVSB01000121	11	ST11 Cplx	Genbank
Escherichia coli B17 gecB17.contig.120	AVSC01000001..AVSC01000121	11	ST11 Cplx	Genbank
Escherichia coli B171 gcontig_1112554187234	AAJX02000001..AAJX02000262	3	ST20 Cplx	Genbank
Escherichia coli B185 genomic scaffold supercont1.44	GG749162..GG749205	3577	-	Genbank
Escherichia coli B26-1 gecB261.contig.59	AVQU01000001..AVQU01000060	11	ST11 Cplx	Genbank
Escherichia coli B26-2 gecB262.contig.57	AVQV01000001..AVQV01000058	11	ST11 Cplx	Genbank
Escherichia coli B28-1 gecB281.contig.120	AVQW01000001..AVQW01000117	11	ST11 Cplx	Genbank
Escherichia coli B28-2 gecB282.contig.129	AVQX01000001..AVQX01000123	11	ST11 Cplx	Genbank
Escherichia coli B29-1 gecB291.contig.121	AVQY01000001..AVQY01000122	11	ST11 Cplx	Genbank
Escherichia coli B29-2 gecB292.contig.121	AVQZ01000001..AVQZ01000120	11	ST11 Cplx	Genbank
Escherichia coli B354 genomic scaffold supercont1.22	GG749326..GG749347	NT	-	Genbank
Escherichia coli B36-1 gecB361.contig.112	AVRA01000001..AVRA01000113	11	ST11 Cplx	Genbank
Escherichia coli B36-2 gecB362.contig.117	AVRB01000001..AVRB01000114	11	ST11 Cplx	Genbank
Escherichia coli B40-1 gecB401.contig.132	AVSD01000001..AVSD01000132	11	ST11 Cplx	Genbank
Escherichia coli B40-2 gecB402.contig.134	AVSE01000001..AVSE01000132	11	ST11 Cplx	Genbank
Escherichia coli B41 Contig1514709539	AFAH02000001..AFAH02000005	10	ST10 Cplx	Genbank
Escherichia coli B49-2 gecB492.contig.129	AVSF01000001..AVSF01000128	11	ST11 Cplx	Genbank
Escherichia coli B5-2 gecB52.contig.123	AVSG01000001..AVSG01000124	11	ST11 Cplx	Genbank
Escherichia coli B7-1 gecB71.contig.52	AVRC01000001..AVRC01000053	11	ST11 Cplx	Genbank
Escherichia coli B7-2 gecB72.contig.58	AVRD01000001..AVRD01000058	11	ST11 Cplx	Genbank
Escherichia coli B799 cont1.78	AHWG01000001..AHWG01000078	58	ST155 Cplx	Genbank
Escherichia coli B7A gcontig_1112495761608	AAJT02000001..AAJT02000289	94	ST448 Cplx	Genbank
Escherichia coli B83 gecB83.contig.131	AVSH01000001..AVSH01000130	11	ST11 Cplx	Genbank
Escherichia coli B84 gecB84.contig.132	AVSI01000001..AVSI01000131	11	ST11 Cplx	Genbank
Escherichia coli B85 gecB85.contig.127	AVSJ01000001..AVSJ01000128	11	ST11 Cplx	Genbank
Escherichia coli B86 gecB86.contig.139	AVSK01000001..AVSK01000136	11	ST11 Cplx	Genbank
Escherichia coli B89 gecB89.contig.138	AVSL01000001..AVSL01000137	11	ST11 Cplx	Genbank
Escherichia coli B90 gecB90.contig.135	AVSM01000001..AVSM01000134	11	ST11 Cplx	Genbank
Escherichia coli B93 gecB93.contig.49	AVRE01000001..AVRE01000050	11	ST11 Cplx	Genbank
Escherichia coli B94 gecB94.contig.56	AVRF01000001..AVRF01000057	11	ST11 Cplx	Genbank
Escherichia coli B95 gecB95.contig.58	AVRG01000001..AVRG01000059	11	ST11 Cplx	Genbank
Escherichia coli BCE001_MS16 gecBCE001MS16.contig.21	AQFK01000001..AQFK01000022	5587	-	Genbank
Escherichia coli BCE002_MS12 gecBCE002MS12.contig.97	AQDA01000001..AQDA01000097	NT	-	Genbank
Escherichia coli BCE006_MS-23 gecBCE006MS23.contig.224	APZM01000001..APZM01000225	2353	-	Genbank
Escherichia coli BCE007_MS-11 gecBCE007MS11.contig.53	AQFJ01000001..AQFJ01000054	NT	-	Genbank
Escherichia coli BCE008_MS-01 gecBCE008MS01.contig.581	APXL01000001..APXL01000574	NT	-	Genbank
Escherichia coli BCE008_MS-13 gecBCE008MS13.contig.31	AQFI01000001..AQFI01000032	2795	-	Genbank
Escherichia coli BCE011_MS-01 gecBCE011MS01.contig.322	APXM01000001..APXM01000318	10	ST10 Cplx	Genbank
Escherichia coli BCE019_MS-13 gecBCE019MS13.contig.197	AQCZ01000001..AQCZ01000198	NT	-	Genbank
Escherichia coli BCE030_MS-09 gecBCE030MS09.contig.252	APXN01000001..APXN01000252	NT	-	Genbank
Escherichia coli BCE032_MS-12 gecBCE032MS12.contig.199	APXO01000001..APXO01000189	2353	-	Genbank
Escherichia coli BCE034_MS-14 gecBCE034MS14.contig.162	AQCY01000001..AQCY01000161	NT	-	Genbank
Escherichia coli Bd5610_99 gecBd561099.contig.143	AVRL01000001..AVRL01000141	11	ST11 Cplx	Genbank
Escherichia coli BIDMC 15 adjFz-supercont2.14.C38	JAPM01000001..JAPM01000038	648	ST648 Cplx	Genbank
Escherichia coli BIDMC 17A adjFM-supercont2.14.C15	JAPL01000001..JAPL01000015	648	ST648 Cplx	Genbank
Escherichia coli BIDMC 17B adjFx-supercont2.8.C14	JAPK01000001..JAPK01000014	648	ST648 Cplx	Genbank
Escherichia coli BIDMC 19A adjGK-supercont2.8.C16	JAPJ01000001..JAPJ01000016	648	ST648 Cplx	Genbank
Escherichia coli BIDMC 19B adjGB-supercont2.9.C16	JAPI01000001..JAPI01000016	648	ST648 Cplx	Genbank
Escherichia coli BIDMC 19C adgYs-supercont1.5	AXLI01000001..AXLI01000005	648	ST648 Cplx	Genbank
Escherichia coli BIDMC 20A adjGc-supercont2.7.C30	JAPH01000001..JAPH01000030	131	ST131 Cplx	Genbank
Escherichia coli BIDMC 20B adjbo-supercont1.5.C18	JAPG01000001..JAPG01000018	131	ST131 Cplx	Genbank
Escherichia coli BIDMC 2B adjFF-supercont2.8.C11	JAPQ01000001..JAPQ01000011	648	ST648 Cplx	Genbank
Escherichia coli BIDMC 3 adjGR-supercont2.14.C18	JAPP01000001..JAPP01000018	648	ST648 Cplx	Genbank
Escherichia coli BIDMC 37 addSY-supercont1.6.C17	AYHV01000001..AYHV01000017	1421	-	Genbank
Escherichia coli BIDMC 38 addSN-supercont1.15.C34	AYHU01000001..AYHU01000034	131	ST131 Cplx	Genbank
Escherichia coli BIDMC 39 addUT-supercont1.17.C30	AYHT01000001..AYHT01000030	206	ST206 Cplx	Genbank
Escherichia coli BIDMC 43a adjcF-supercont1.9.C14	JAPF01000001..JAPF01000014	648	ST648 Cplx	Genbank
Escherichia coli BIDMC 43b adjcM-supercont1.8.C31	JAPE01000001..JAPE01000031	648	ST648 Cplx	Genbank
Escherichia coli BIDMC 49a adjcK-supercont1.7.C33	JAPU01000001..JAPU01000033	95	ST95 Cplx	Genbank
Escherichia coli BIDMC 49b adjbR-supercont1.6.C28	JAPT01000001..JAPT01000028	95	ST95 Cplx	Genbank
Escherichia coli BIDMC 58 aeebe-supercont1.13.C20	JMUW01000001..JMUW01000020	131	ST131 Cplx	Genbank
Escherichia coli BIDMC 59 aedZB-supercont1.2.C16	JMUX01000001..JMUX01000016	1304	-	Genbank
Escherichia coli BIDMC 6 adjGP-supercont2.12.C15	JAPV01000001..JAPV01000015	648	ST648 Cplx	Genbank
Escherichia coli BIDMC 62 aeeax-supercont1.12.C21	JMUY01000001..JMUY01000021	131	ST131 Cplx	Genbank
Escherichia coli BIDMC 63 aeeaP-supercont1.6.C19	JMUZ01000001..JMUZ01000019	131	ST131 Cplx	Genbank
Escherichia coli BIDMC 64 aedZl-supercont1.13.C19	JMVA01000001..JMVA01000019	131	ST131 Cplx	Genbank
Escherichia coli BIDMC 65 aeeaj-supercont1.9.C37	JMVB01000001..JMVB01000037	95	ST95 Cplx	Genbank
Escherichia coli BIDMC 70 aedZV-supercont1.5.C18	JMVC01000001..JMVC01000018	131	ST131 Cplx	Genbank
Escherichia coli BIDMC 71 aeeas-supercont1.18.C47	JMVD01000001..JMVD01000047	648	ST648 Cplx	Genbank
Escherichia coli BIDMC 72 aeeaH-supercont1.11.C50	JMVE01000001..JMVE01000050	1193	-	Genbank
Escherichia coli BIDMC 73 aedYX-supercont1.11.C33	JMVF01000001..JMVF01000033	1193	-	Genbank
Escherichia coli BIDMC 74 aedZt-supercont1.13.C41	JMVG01000001..JMVG01000041	5632	-	Genbank
Escherichia coli BIDMC 75 aedZx-supercont1.15.C43	JMVH01000001..JMVH01000043	131	ST131 Cplx	Genbank
Escherichia coli BIDMC 76 aedYY-supercont1.10.C33	JMVI01000001..JMVI01000033	131	ST131 Cplx	Genbank
Escherichia coli BIDMC 77 aeeaD-supercont1.16.C46	JMVJ01000001..JMVJ01000046	405	ST405 Cplx	Genbank
Escherichia coli BIDMC 78 aeebc-supercont1.7.C24	JMVK01000001..JMVK01000024	131	ST131 Cplx	Genbank
Escherichia coli BIDMC 79 aeeaE-supercont1.14.C37	JMVL01000001..JMVL01000037	131	ST131 Cplx	Genbank
Escherichia coli BIDMC 82 adLYc-supercont1.145.C146	JJMY01000001..JJMY01000146	648	ST648 Cplx	Genbank
Escherichia coli BIDMC 83 adMdV-supercont1.97.C99	JJMX01000001..JJMX01000099	12	ST12 Cplx	Genbank
Escherichia coli BIDMC 9 adjGr-supercont2.18.C52	JAPN01000001..JAPN01000052	648	ST648 Cplx	Genbank
Escherichia coli BL21(DE3)	CP001509	93	ST168 Cplx	Genbank
Escherichia coli BL21(DE3)	AM946981	93	ST168 Cplx	Genbank
Escherichia coli BL21-Gold(DE3)pLysS AG	CP001665	93	ST168 Cplx	Genbank
Escherichia coli BW2952	CP001396	10	ST10 Cplx	Genbank
Escherichia coli BWH 24 adgVo-supercont1.4	AXLH01000001..AXLH01000004	131	ST131 Cplx	Genbank
Escherichia coli BWH 32 addUj-supercont1.24.C47	AYIO01000001..AYIO01000047	2569	-	Genbank
Escherichia coli BWH 34 adjci-supercont1.4.C5	JAPS01000001..JAPS01000005	131	ST131 Cplx	Genbank
Escherichia coli BWH 40 adjbS-supercont1.5.C23	JAPR01000001..JAPR01000023	405	ST405 Cplx	Genbank
Escherichia coli C12_92	AIAE00000000.1	335	ST11 Cplx	Genbank
Escherichia coli C1214_90	AIAC00000000.1	29	ST29 Cplx	Genbank
Escherichia coli C1244_91	AIAD00000000.1	335	ST11 Cplx	Genbank
Escherichia coli C154_11	AIAF00000000.1	335	ST11 Cplx	Genbank
Escherichia coli C155_11	AIAG00000000.1	21	ST29 Cplx	Genbank
Escherichia coli C157_11	AIAH00000000.1	335	ST11 Cplx	Genbank
Escherichia coli C161_11	AIAI00000000.1	32	ST32 Cplx	Genbank
Escherichia coli C166_11 strain C1214_90	AICF00000000.1	29	ST29 Cplx	Genbank
Escherichia coli C170_11	AIAJ00000000.1	20	ST20 Cplx	Genbank
Escherichia coli C213_10	AIAL00000000.1	10	ST10 Cplx	Genbank
Escherichia coli C2139_99	AIAM00000000.1	28	ST28 Cplx	Genbank
Escherichia coli C238_91	AIAN00000000.1	343	-	Genbank
Escherichia coli C260_92	AIAO00000000.1	10	ST10 Cplx	Genbank
Escherichia coli C262_10	AIAP00000000.1	589	-	Genbank
Escherichia coli C283_09	AIAQ00000000.1	342	-	Genbank
Escherichia coli C295_10	AIAR00000000.1	5394	-	Genbank
Escherichia coli C321.deltaA	CP006698	10	ST10 Cplx	Genbank
Escherichia coli C341_10	AIAS00000000.1	20	ST20 Cplx	Genbank
Escherichia coli C343_08	AIAT00000000.1	154	-	Genbank
Escherichia coli C-34666 gecC34666.contig.199	AQCX01000001..AQCX01000199	NT	-	Genbank
Escherichia coli C347_93	AIAU00000000.1	29	ST29 Cplx	Genbank
Escherichia coli C353_09	AIAV00000000.1	2538	-	Genbank
Escherichia coli C354_03B	AIAW00000000.1	11	ST11 Cplx	Genbank
Escherichia coli C40_11	AIAX00000000.1	342	-	Genbank
Escherichia coli C418_89	AIAY00000000.1	583	ST122 Cplx	Genbank
Escherichia coli C458_10	AIAZ00000000.1	40	ST40 Cplx	Genbank
Escherichia coli C488_07	AIBA00000000.1	20	ST20 Cplx	Genbank
Escherichia coli C496_10	AIBB00000000.1	10	ST10 Cplx	Genbank
Escherichia coli C497_10	AIBC00000000.1	20	ST20 Cplx	Genbank
Escherichia coli C527_94	AIBD00000000.1	328	ST278 Cplx	Genbank
Escherichia coli C58_11	AIBF00000000.1	526	-	Genbank
Escherichia coli C581_05	AIBE00000000.1	28	ST28 Cplx	Genbank
Escherichia coli C586_05	AIBG00000000.1	28	ST28 Cplx	Genbank
Escherichia coli C639_08	AIBH00000000.1	725	-	Genbank
Escherichia coli C652_10	AIBI00000000.1	517	-	Genbank
Escherichia coli C654_09	AIBJ00000000.1	29	ST29 Cplx	Genbank
Escherichia coli C717_10	AIBK00000000.1	4550	-	Genbank
Escherichia coli C725_88	AIBL00000000.1	590	ST590 Cplx	Genbank
Escherichia coli C732_98	AIBM00000000.1	206	ST206 Cplx	Genbank
Escherichia coli C743_03	AIBN00000000.1	517	-	Genbank
Escherichia coli C751_03	AIBO00000000.1	206	ST206 Cplx	Genbank
Escherichia coli C78_09C	AIBP00000000.1	582	ST582 Cplx	Genbank
Escherichia coli C79_08	AIBQ00000000.1	28	ST28 Cplx	Genbank
Escherichia coli C792_92	AIBR00000000.1	29	ST29 Cplx	Genbank
Escherichia coli C796_10	AIBS00000000.1	2346	-	Genbank
Escherichia coli C799_92	AIBT00000000.1	29	ST29 Cplx	Genbank
Escherichia coli C80_08	AIBU00000000.1	590	ST590 Cplx	Genbank
Escherichia coli C807_09	AIBV00000000.1	327	-	Genbank
Escherichia coli C82_11	AIBW00000000.1	20	ST20 Cplx	Genbank
Escherichia coli C824_10	AIBX00000000.1	29	ST29 Cplx	Genbank
Escherichia coli C842_97	AIBY00000000.1	11	ST11 Cplx	Genbank
Escherichia coli C844_97	AIBZ00000000.1	725	-	Genbank
Escherichia coli C87_11	AICA00000000.1	327	-	Genbank
Escherichia coli C887_10	AICB00000000.1	121	ST28 Cplx	Genbank
Escherichia coli C9_92	AICE00000000.1	2356	-	Genbank
Escherichia coli C900_01	AICC00000000.1	17	ST20 Cplx	Genbank
Escherichia coli C93_11	AICD00000000.1	4554	-	Genbank
Escherichia coli CAG:4 WGS project CBFX01000000 data, contig	CBFX010000001..CBFX010000086	538	ST538 Cplx	Genbank
Escherichia coli CB7326 CB7326.contig.604_1	AMUH01000001..AMUH01000524	11	ST11 Cplx	Genbank
Escherichia coli CE418 contig_1062	ATEW01000001..ATEW01001062	94	ST448 Cplx	Genbank
Escherichia coli CE516 contig_430	ATEX01000001..ATEX01000430	1490	-	Genbank
Escherichia coli CE549 contig_495	ATEY01000001..ATEY01000495	4	ST10 Cplx	Genbank
Escherichia coli CFT073	AE014075	73	ST73 Cplx	Genbank
Escherichia coli chi7122 chi7122 genomic chromosome, chi7122	HE962388	23	ST23 Cplx	Genbank
Escherichia coli CHS 68 aedZQ-supercont1.15.C35	JMVM01000001..JMVM01000035	131	ST131 Cplx	Genbank
Escherichia coli CHS 69 aedZo-supercont1.12.C72	JMVN01000001..JMVN01000072	131	ST131 Cplx	Genbank
Escherichia coli CHS 77 aeeam-supercont1.7.C32	JMVO01000001..JMVO01000032	5441	-	Genbank
Escherichia coli cloneA_i1 Contig302	AEYT01000001..AEYT01000056	NT	-	Genbank
Escherichia coli CUMT8 contig00223	AJWV01000001..AJWV01000172	345	-	Genbank
Escherichia coli D6-113.11 genomic scaffold, EcD6_113_11_1_Scaffold260	HG977145..HG977192	4175	-	Genbank
Escherichia coli D6-113.11 WGS project CCCO000000000 data, contig EcD6_113_11_1_scaffold260-Contig1	CCCO010000001..CCCO010000090	4175	-	Genbank
Escherichia coli D6-117.29 WGS project CCCR000000000 data, contig EcD6-117_29_2_contig3694-Contig1	CCCR010000001..CCCR010000980	10	ST10 Cplx	Genbank
Escherichia coli D6-117_07.11 genomic scaffold, EcD6_117_07_1_Scaffold76	HG976947..HG976973	10	ST10 Cplx	Genbank
Escherichia coli D6-117_07.11 WGS project CCCP000000000 data, contig EcD6_117_07_1_Scaffold76-Contig1	CCCP010000001..CCCP010000052	10	ST10 Cplx	Genbank
Escherichia coli DEC10A gecDEC10A.contig.75_1	AIGP01000001..AIGP01000076	21	ST29 Cplx	Genbank
Escherichia coli DEC10B gecDEC10B.contig.77_1	AIGQ01000001..AIGQ01000078	21	ST29 Cplx	Genbank
Escherichia coli DEC10C gecDEC10C.contig.60_1	AIGR01000001..AIGR01000060	21	ST29 Cplx	Genbank
Escherichia coli DEC10D gecDEC10D.contig.60_1	AIGS01000001..AIGS01000061	NT	-	Genbank
Escherichia coli DEC10E gecDEC10E.contig.46_1	AIGT01000001..AIGT01000047	7	-	Genbank
Escherichia coli DEC10F gecDEC10F.contig.90_1	AIGU01000001..AIGU01000091	NT	-	Genbank
Escherichia coli DEC11A gecDEC11A.contig.55_1	AIGV01000001..AIGV01000056	20	ST20 Cplx	Genbank
Escherichia coli DEC11B gecDEC11B.contig.48_1	AIGW01000001..AIGW01000049	20	ST20 Cplx	Genbank
Escherichia coli DEC11C gecDEC11C.contig.89_1	AIGX01000001..AIGX01000088	17	ST20 Cplx	Genbank
Escherichia coli DEC11D gecDEC11D.contig.55_1	AIGY01000001..AIGY01000056	3	ST20 Cplx	Genbank
Escherichia coli DEC11E gecDEC11E.contig.45_1	AIGZ01000001..AIGZ01000046	3	ST20 Cplx	Genbank
Escherichia coli DEC12A gecDEC12A.contig.80_1	AIHA01000001..AIHA01000081	3	ST20 Cplx	Genbank
Escherichia coli DEC12B gecDEC12B.contig.77_1	AIHB01000001..AIHB01000078	3	ST20 Cplx	Genbank
Escherichia coli DEC12C gecDEC12C.contig.89_1	AIHC01000001..AIHC01000090	3	ST20 Cplx	Genbank
Escherichia coli DEC12D gecDEC12D.contig.87_1	AIHD01000001..AIHD01000088	3	ST20 Cplx	Genbank
Escherichia coli DEC12E gecDEC12E.contig.96_1	AIHE01000001..AIHE01000097	3	ST20 Cplx	Genbank
Escherichia coli DEC13A gecDEC13A.contig.36_1	AIHF01000001..AIHF01000037	296	ST278 Cplx	Genbank
Escherichia coli DEC13B gecDEC13B.contig.52_1	AIHG01000001..AIHG01000053	296	ST278 Cplx	Genbank
Escherichia coli DEC13C gecDEC13C.contig.67_1	AIHH01000001..AIHH01000068	278	ST278 Cplx	Genbank
Escherichia coli DEC13D gecDEC13D.contig.41_1	AIHI01000001..AIHI01000042	278	ST278 Cplx	Genbank
Escherichia coli DEC13E gecDEC13E.contig.53_1	AIHJ01000001..AIHJ01000054	278	ST278 Cplx	Genbank
Escherichia coli DEC14A gecDEC14A.contig.45_1	AIHK01000001..AIHK01000046	297	-	Genbank
Escherichia coli DEC14B gecDEC14B.contig.83_1	AIHL01000001..AIHL01000084	7	-	Genbank
Escherichia coli DEC14C gecDEC14C.contig.75_1	AIHM01000001..AIHM01000076	7	-	Genbank
Escherichia coli DEC14D gecDEC14D.contig.76_1	AIHN01000001..AIHN01000076	7	-	Genbank
Escherichia coli DEC15A gecDEC15A.contig.60_1	AIHO01000001..AIHO01000060	40	ST40 Cplx	Genbank
Escherichia coli DEC15B gecDEC15B.contig.44_1	AIHP01000001..AIHP01000045	40	ST40 Cplx	Genbank
Escherichia coli DEC15C gecDEC15C.contig.31_1	AIHQ01000001..AIHQ01000032	40	ST40 Cplx	Genbank
Escherichia coli DEC15D gecDEC15D.contig.30_1	AIHR01000001..AIHR01000031	40	ST40 Cplx	Genbank
Escherichia coli DEC15E gecDEC15E.contig.63_1	AIHS01000001..AIHS01000063	40	ST40 Cplx	Genbank
Escherichia coli DEC1A gecDEC1A.contig.62_1	AIEV01000001..AIEV01000063	19	-	Genbank
Escherichia coli DEC1B gecDEC1B.contig.88_1	AIEW01000001..AIEW01000089	19	-	Genbank
Escherichia coli DEC1C gecDEC1C.contig.80_1	AIEX01000001..AIEX01000081	19	-	Genbank
Escherichia coli DEC1D gecDEC1D.contig.66_1	AIEY01000001..AIEY01000066	293	-	Genbank
Escherichia coli DEC1E gecDEC1E.contig.49_1	AIEZ01000001..AIEZ01000050	19	-	Genbank
Escherichia coli DEC2A gecDEC2A.contig.71_1	AIFA01000001..AIFA01000072	19	-	Genbank
Escherichia coli DEC2B gecDEC2B.contig.53_1	AFJB01000001..AFJB01000054	19	-	Genbank
Escherichia coli DEC2C gecDEC2C.contig.93_1	AIFB01000001..AIFB01000094	19	-	Genbank
Escherichia coli DEC2D gecDEC2D.contig.44_1	AIFC01000001..AIFC01000045	19	-	Genbank
Escherichia coli DEC2E gecDEC2E.contig.77_1	AIFD01000001..AIFD01000077	NT	-	Genbank
Escherichia coli DEC3A gecDEC3A.contig.60_1	AIFE01000001..AIFE01000061	11	ST11 Cplx	Genbank
Escherichia coli DEC3B gecDEC3B.contig.60_1	AIFF01000001..AIFF01000061	11	ST11 Cplx	Genbank
Escherichia coli DEC3C gecDEC3C.contig.72_1	AIFG01000001..AIFG01000072	11	ST11 Cplx	Genbank
Escherichia coli DEC3D gecDEC3D.contig.96_1	AIFH01000001..AIFH01000096	11	ST11 Cplx	Genbank
Escherichia coli DEC3E gecDEC3E.contig.97_1	AIFI01000001..AIFI01000098	11	ST11 Cplx	Genbank
Escherichia coli DEC3F gecDEC3F.contig.92_1	AIFJ01000001..AIFJ01000093	11	ST11 Cplx	Genbank
Escherichia coli DEC4A gecDEC4A.contig.67_1	AIFK01000001..AIFK01000068	11	ST11 Cplx	Genbank
Escherichia coli DEC4B gecDEC4B.contig.95_1	AIFL01000001..AIFL01000096	11	ST11 Cplx	Genbank
Escherichia coli DEC4C gecDEC4C.contig.61_1	AIFM01000001..AIFM01000062	11	ST11 Cplx	Genbank
Escherichia coli DEC4D gecDEC4D.contig.79_1	AIFN01000001..AIFN01000080	11	ST11 Cplx	Genbank
Escherichia coli DEC4E gecDEC4E.contig.66_1	AIFO01000001..AIFO01000066	11	ST11 Cplx	Genbank
Escherichia coli DEC4F gecDEC4F.contig.73_1	AIFP01000001..AIFP01000074	11	ST11 Cplx	Genbank
Escherichia coli DEC5A gecDEC5A.contig.46_1	AIFQ01000001..AIFQ01000047	NT	-	Genbank
Escherichia coli DEC5B gecDEC5B.contig.73_1	AIFR01000001..AIFR01000073	335	ST11 Cplx	Genbank
Escherichia coli DEC5C gecDEC5C.contig.53_1	AIFS01000001..AIFS01000054	335	ST11 Cplx	Genbank
Escherichia coli DEC5D gecDEC5D.contig.47_1	AIFT01000001..AIFT01000048	335	ST11 Cplx	Genbank
Escherichia coli DEC5E gecDEC5E.contig.48_1	AIFU01000001..AIFU01000049	61	ST11 Cplx	Genbank
Escherichia coli DEC6A gecDEC6A.contig.60_1	AIFV01000001..AIFV01000061	292	ST10 Cplx	Genbank
Escherichia coli DEC6B gecDEC6B.contig.65_1	AIFW01000001..AIFW01000065	10	ST10 Cplx	Genbank
Escherichia coli DEC6C gecDEC6C.contig.76_1	AIFX01000001..AIFX01000077	10	ST10 Cplx	Genbank
Escherichia coli DEC6D gecDEC6D.contig.59_1	AIFY01000001..AIFY01000060	10	ST10 Cplx	Genbank
Escherichia coli DEC6E gecDEC6E.contig.52_1	AIFZ01000001..AIFZ01000053	10	ST10 Cplx	Genbank
Escherichia coli DEC7A gecDEC7A.contig.64_1	AIGA01000001..AIGA01000064	90	ST23 Cplx	Genbank
Escherichia coli DEC7B gecDEC7B.contig.149_1	AIGB01000001..AIGB01000148	3744	-	Genbank
Escherichia coli DEC7C gecDEC7C.contig.67_1	AIGC01000001..AIGC01000068	90	ST23 Cplx	Genbank
Escherichia coli DEC7D gecDEC7D.contig.47_1	AIGD01000001..AIGD01000048	90	ST23 Cplx	Genbank
Escherichia coli DEC7E gecDEC7E.contig.56_1	AIGE01000001..AIGE01000057	90	ST23 Cplx	Genbank
Escherichia coli DEC8A gecDEC8A.contig.100_1	AIGF01000001..AIGF01000101	16	ST29 Cplx	Genbank
Escherichia coli DEC8B gecDEC8B.contig.99_1	AIGG01000001..AIGG01000100	294	ST29 Cplx	Genbank
Escherichia coli DEC8C gecDEC8C.contig.94_1	AIGH01000001..AIGH01000095	21	ST29 Cplx	Genbank
Escherichia coli DEC8D gecDEC8D.contig.60_1	AIGI01000001..AIGI01000061	21	ST29 Cplx	Genbank
Escherichia coli DEC8E gecDEC8E.contig.71_1	AIGJ01000001..AIGJ01000072	NT	-	Genbank
Escherichia coli DEC9A gecDEC9A.contig.79_1	AIGK01000001..AIGK01000080	29	ST29 Cplx	Genbank
Escherichia coli DEC9B gecDEC9B.contig.64_1	AIGL01000001..AIGL01000064	29	ST29 Cplx	Genbank
Escherichia coli DEC9C gecDEC9C.contig.65_1	AIGM01000001..AIGM01000066	29	ST29 Cplx	Genbank
Escherichia coli DEC9D gecDEC9D.contig.64_1	AIGN01000001..AIGN01000065	29	ST29 Cplx	Genbank
Escherichia coli DEC9E gecDEC9E.contig.67_1	AIGO01000001..AIGO01000068	29	ST29 Cplx	Genbank
Escherichia coli DH1	CP001637	1060	-	Genbank
Escherichia coli DH1 (ME8569)	AP012030	1060	-	Genbank
Escherichia coli DORA_A_5_14_21 Q609_ECAC02923	AZLZ01000001..AZLZ01002924	NT	-	Genbank
Escherichia coli DORA_B_14 Q610_ECBC00412	AZMA01000001..AZMA01000412	NT	-	Genbank
Escherichia coli DSM 30083 = JCM 1649 = ATCC 11775 DNA	BAIM00000000.1	NT	-	Genbank
Escherichia coli DSM 30083 = JCM 1649 = ATCC 11775 GECO.assembly.150	JMST01000001..JMST01000135	95	ST95 Cplx	Genbank
Escherichia coli DSM 30083 = JCM 1649 = ATCC 11775 strain DSM 30083 Scaffold1_C1	AGSE00000000.1	95	ST95 Cplx	Genbank
Escherichia coli E101 cont1.95	AEXG01000001..AEXG01000095	3751	-	Genbank
Escherichia coli E110019 gcontig_1112495928716	AAJW02000001..AAJW02000137	381	ST590 Cplx	Genbank
Escherichia coli E1140 1140_unitig_11	JDFU02000001..JDFU02000011	641	ST86 Cplx	Genbank
Escherichia coli E1167 cont2.87	AEHS01000001..AEHS01000087	1727	-	Genbank
Escherichia coli E128010 gecE128010.assembly.9	ADUO01000001..ADUO01000284	3	ST20 Cplx	Genbank
Escherichia coli E1520 cont2.127	AEHT01000001..AEHT01000127	48	ST10 Cplx	Genbank
Escherichia coli E1728 strain 1728 E1728_contig_170	JDFV01000001..JDFV01000170	641	ST86 Cplx	Genbank
Escherichia coli E1777 contig_204	ASYQ02000001..ASYQ02000204	443	ST205 Cplx	Genbank
Escherichia coli E22 gcontig_1112495647330	AAJV02000001..AAJV02000127	20	ST20 Cplx	Genbank
Escherichia coli E2265 contig_627	ASRW01000001..ASRW01000627	443	ST205 Cplx	Genbank
Escherichia coli E24377A	CP000795..CP000801	1132	-	Genbank
Escherichia coli E482 cont2.94	AEHU01000001..AEHU01000094	1288	-	Genbank
Escherichia coli EC096/10 contig63	AONF01000001..AONF01000063	349	ST349 Cplx	Genbank
Escherichia coli EC1734 EC1734.contig.53	AKMO01000001..AKMO01000054	11	ST11 Cplx	Genbank
Escherichia coli EC1735 EC1735.contig.496_1	AMUR01000001..AMUR01000430	11	ST11 Cplx	Genbank
Escherichia coli EC1736 EC1736.contig.486_1	AMUS01000001..AMUS01000427	11	ST11 Cplx	Genbank
Escherichia coli EC1737 EC1737.contig.549_1	AMUT01000001..AMUT01000500	11	ST11 Cplx	Genbank
Escherichia coli EC1738 EC1738.contig.61	AKMN01000001..AKMN01000062	11	ST11 Cplx	Genbank
Escherichia coli EC1845 EC1845.contig.577_1	AKMP01000001..AKMP01000540	11	ST11 Cplx	Genbank
Escherichia coli EC1846 EC1846.contig.585_1	AMUU01000001..AMUU01000550	11	ST11 Cplx	Genbank
Escherichia coli EC1847 EC1847.contig.568_1	AMUV01000001..AMUV01000527	11	ST11 Cplx	Genbank
Escherichia coli EC1848 EC1848.contig.470_2	AMUW01000001..AMUW01000447	11	ST11 Cplx	Genbank
Escherichia coli EC1849 EC1849.contig.517_2	AMUX01000001..AMUX01000488	11	ST11 Cplx	Genbank
Escherichia coli EC1850 EC1850.contig.465_1	AMUY01000001..AMUY01000457	11	ST11 Cplx	Genbank
Escherichia coli EC1856 EC1856.contig.458_2	AMUZ01000001..AMUZ01000454	11	ST11 Cplx	Genbank
Escherichia coli EC1862 EC1862.contig.700_1	AMVA01000001..AMVA01000661	11	ST11 Cplx	Genbank
Escherichia coli EC1863 EC1863.contig.467_1	AKMQ01000001..AKMQ01000412	11	ST11 Cplx	Genbank
Escherichia coli EC1864 EC1864.contig.515_1	AMVB01000001..AMVB01000469	11	ST11 Cplx	Genbank
Escherichia coli EC1865 EC1865.contig.886_4	AMVC01000001..AMVC01000788	21	ST29 Cplx	Genbank
Escherichia coli EC1866 EC1866.contig.488_1	AMVD01000001..AMVD01000461	11	ST11 Cplx	Genbank
Escherichia coli EC1868 EC1868.contig.518_1	AMVE01000001..AMVE01000475	11	ST11 Cplx	Genbank
Escherichia coli EC1869 EC1869.contig.489_1	AMVF01000001..AMVF01000465	11	ST11 Cplx	Genbank
Escherichia coli EC1870 EC1870.contig.620_2	AMVG01000001..AMVG01000542	11	ST11 Cplx	Genbank
Escherichia coli EC302/04	AMFM00000000.1	349	ST349 Cplx	Genbank
Escherichia coli EC4013 EC4013.contig.539_1	AKMH01000001..AKMH01000463	11	ST11 Cplx	Genbank
Escherichia coli EC4100B ECL.Contig111_1	AERU01000001..AERU01000042	1890	-	Genbank
Escherichia coli EC4196 EC4196.contig.687_1	AKMC01000001..AKMC01000573	11	ST11 Cplx	Genbank
Escherichia coli EC4203 EC4203.contig.598_1	AKMB01000001..AKMB01000552	11	ST11 Cplx	Genbank
Escherichia coli EC4402 EC4402.contig.821_1	AKMI01000001..AKMI01000785	11	ST11 Cplx	Genbank
Escherichia coli EC4421 EC4421.contig.501_1	AKMF01000001..AKMF01000437	11	ST11 Cplx	Genbank
Escherichia coli EC4422 EC4422.contig.477_1	AKMG01000001..AKMG01000393	11	ST11 Cplx	Genbank
Escherichia coli EC4436 EC4436.contig.518_1	AKMK01000001..AKMK01000456	11	ST11 Cplx	Genbank
Escherichia coli EC4437 EC4437.contig.499_1	AKML01000001..AKML01000423	11	ST11 Cplx	Genbank
Escherichia coli EC4439 EC4439.contig.572_1	AKMJ01000001..AKMJ01000534	11	ST11 Cplx	Genbank
Escherichia coli EC4448 EC4448.contig.592_1	AKMM01000001..AKMM01000566	11	ST11 Cplx	Genbank
Escherichia coli EC96038 EC96038.contig.657_2	AMUI01000001..AMUI01000504	11	ST11 Cplx	Genbank
Escherichia coli ECA-0157 contig01309	AHHK01000001..AHHK01001173	NT	-	Genbank
Escherichia coli ECA-727 contig00575	AHHL01000001..AHHL01000539	NT	-	Genbank
Escherichia coli ECC-1470 contig01096	AHHM01000001..AHHM01000994	NT	-	Genbank
Escherichia coli ECC-Z plasmid_contig2	AHHN01000001..AHHN01000024	10	ST10 Cplx	Genbank
Escherichia coli ED1a	CU928162	452	-	Genbank
Escherichia coli Envira 10/1 gecEnvira10.contig.52	AQFD01000001..AQFD01000052	443	ST205 Cplx	Genbank
Escherichia coli Envira 8/11 gecEnvira8.contig.62	AQFC01000001..AQFC01000063	443	ST205 Cplx	Genbank
Escherichia coli EPEC C342-62 gecC34262.contig.47	AKNI01000001..AKNI01000047	3	ST20 Cplx	Genbank
Escherichia coli EPECa12 EPECa12.contig.109	AKNH01000001..AKNH01000110	90	ST23 Cplx	Genbank
Escherichia coli EPECa14 EPECa14.assembly.9	ADUN01000001..ADUN01000199	21	ST29 Cplx	Genbank
Escherichia coli ETEC H10407	FN649414..FN649418	48	ST10 Cplx	Genbank
Escherichia coli F11 gcontig_1112495914638	AAJU02000001..AAJU02000119	NT	-	Genbank
Escherichia coli FAH1	AYJZ00000000.1	453	ST86 Cplx	Genbank
Escherichia coli FAH2	AYJY00000000.1	453	ST86 Cplx	Genbank
Escherichia coli FAP1	AYKA00000000.1	453	ST86 Cplx	Genbank
Escherichia coli FAP2	AYKB00000000.1	453	ST86 Cplx	Genbank
Escherichia coli FBH1	AYRC00000000.1	540	-	Genbank
Escherichia coli FBP1	AYKC00000000.1	6593	-	Genbank
Escherichia coli FCH1	AYKD00000000.1	711	-	Genbank
Escherichia coli FCP1	AYKE00000000.1	3321	-	Genbank
Escherichia coli FDA504 FDA504.contig.399_3	AMTU01000001..AMTU01000395	11	ST11 Cplx	Genbank
Escherichia coli FDA505 FDA505.contig.577_1	AKKW01000001..AKKW01000540	11	ST11 Cplx	Genbank
Escherichia coli FDA506 FDA506.contig.423_1	AMTS01000001..AMTS01000378	11	ST11 Cplx	Genbank
Escherichia coli FDA507 FDA507.contig.486_1	AMTT01000001..AMTT01000446	11	ST11 Cplx	Genbank
Escherichia coli FDA517 FDA517.contig.636_1	AKKX01000001..AKKX01000533	11	ST11 Cplx	Genbank
Escherichia coli FRIK1985 FRIK1985.contig.784_2	AKKZ01000001..AKKZ01000730	11	ST11 Cplx	Genbank
Escherichia coli FRIK1990 FRIK1990.contig.725_1	AKLA01000001..AKLA01000629	11	ST11 Cplx	Genbank
Escherichia coli FRIK1996 FRIK1996.contig.628_1	AKKY01000001..AKKY01000580	11	ST11 Cplx	Genbank
Escherichia coli FRIK1997 FRIK1997.contig.601_1	AMTW01000001..AMTW01000548	11	ST11 Cplx	Genbank
Escherichia coli FRIK1999 FRIK1999.contig.528_9	AMTV01000001..AMTV01000480	11	ST11 Cplx	Genbank
Escherichia coli FRIK2001 FRIK2001.contig.477_1	AMTZ01000001..AMTZ01000453	11	ST11 Cplx	Genbank
Escherichia coli FRIK523 FRIK523.contig.534_1	AMVI01000001..AMVI01000504	11	ST11 Cplx	Genbank
Escherichia coli FRIK920 FRIK920.contig.126	AMTP01000001..AMTP01000127	11	ST11 Cplx	Genbank
Escherichia coli FVEC1302 genomic scaffold supercont1.50	GG774899..GG774948	69	ST69 Cplx	Genbank
Escherichia coli FVEC1412 genomic scaffold supercont1.49	GG749206..GG749254	69	ST69 Cplx	Genbank
Escherichia coli G58-1 gecG58.contig.109	AFDX01000001..AFDX01000107	10	ST10 Cplx	Genbank
Escherichia coli GSK2024	AXOE00000000.1	NT	-	Genbank
Escherichia coli H120 cont2.172	AEHV01000001..AEHV01000172	1125	-	Genbank
Escherichia coli H252 cont2.112	AEFI01000001..AEFI01000112	95	ST95 Cplx	Genbank
Escherichia coli H263 cont2.165	AEFJ01000001..AEFJ01000165	95	ST95 Cplx	Genbank
Escherichia coli H299 genomic scaffold supercont1.113	GL884490..GL884602	117	-	Genbank
Escherichia coli H30	GL896773.1	11	ST11 Cplx	Genbank
Escherichia coli H397 cont1.120	AEXH01000001..AEXH01000120	95	ST95 Cplx	Genbank
Escherichia coli H489 cont2.141	AEHX01000001..AEHX01000141	93	ST168 Cplx	Genbank
Escherichia coli H494 cont1.114	AFQH01000001..AFQH01000114	453	ST86 Cplx	Genbank
Escherichia coli H591 genomic scaffold supercont1.82	GL884408..GL884489	155	ST155 Cplx	Genbank
Escherichia coli H730 cont1.97	AHWF01000001..AHWF01000097	10	ST10 Cplx	Genbank
Escherichia coli H736 genomic scaffold supercont1.38	GL883767..GL883804	227	ST10 Cplx	Genbank
Escherichia coli HM26 HM26_1	APNW00000000.1	963	-	Genbank
Escherichia coli HM27 HM27_1	APNU00000000.1	12	ST12 Cplx	Genbank
Escherichia coli HM46 HM46_1	APNY00000000.1	349	ST349 Cplx	Genbank
Escherichia coli HM605	CADZ00000000.1	NT	-	Genbank
Escherichia coli HM605 contig00358	AJWU00000000.1	95	ST95 Cplx	Genbank
Escherichia coli HM65 HM65_1	APNX00000000.1	141	-	Genbank
Escherichia coli HM69 HM69_1	APNV00000000.1	69	ST69 Cplx	Genbank
Escherichia coli HS	CP000802	46	ST46 Cplx	Genbank
Escherichia coli HVH 1 (4-6876161) acXub-supercont1.10.C43	AVSX01000001..AVSX01000043	95	ST95 Cplx	Genbank
Escherichia coli HVH 10 (4-6832164) acXuv-supercont1.8.C22	AVTF01000001..AVTF01000022	69	ST69 Cplx	Genbank
Escherichia coli HVH 100 (4-2850729) acYzQ-supercont1.7.C32	AVVQ01000001..AVVQ01000032	127	-	Genbank
Escherichia coli HVH 102 (4-6906788) acXuw-supercont1.8.C42	AVVR01000001..AVVR01000042	95	ST95 Cplx	Genbank
Escherichia coli HVH 103 (4-5904188) acYyj-supercont1.15.C48	AVVS01000001..AVVS01000048	73	ST73 Cplx	Genbank
Escherichia coli HVH 104 (4-6977960) acXuu-supercont1.14.C74	AVVT01000001..AVVT01000074	95	ST95 Cplx	Genbank
Escherichia coli HVH 106 (4-6881831) acXuP-supercont1.12.C24	AVVU01000001..AVVU01000024	69	ST69 Cplx	Genbank
Escherichia coli HVH 107 (4-5860571) acXun-supercont1.19.C80	AVVV01000001..AVVV01000080	1057	-	Genbank
Escherichia coli HVH 108 (4-6924867) acXvf-supercont1.19.C46	AVVW01000001..AVVW01000046	428	-	Genbank
Escherichia coli HVH 109 (4-6977162) acXtU-supercont1.23.C94	AVVX01000001..AVVX01000094	73	ST73 Cplx	Genbank
Escherichia coli HVH 110 (4-6978754) acXvh-supercont1.15.C39	AVVY01000001..AVVY01000039	69	ST69 Cplx	Genbank
Escherichia coli HVH 111 (4-7039018) acXua-supercont1.6.C23	AVVZ01000001..AVVZ01000023	12	ST12 Cplx	Genbank
Escherichia coli HVH 112 (4-5987253) acXve-supercont1.17.C34	AVWA01000001..AVWA01000034	127	-	Genbank
Escherichia coli HVH 113 (4-7535473) acYyw-supercont1.15.C57	AVWB01000001..AVWB01000057	69	ST69 Cplx	Genbank
Escherichia coli HVH 114 (4-7037740) acYxI-supercont1.12.C36	AVWC01000001..AVWC01000036	73	ST73 Cplx	Genbank
Escherichia coli HVH 115 (4-4465989) acYxs-supercont1.11.C53	AVWE01000001..AVWE01000053	453	ST86 Cplx	Genbank
Escherichia coli HVH 115 (4-4465997) acYyp-supercont1.18.C80	AVWD01000001..AVWD01000080	453	ST86 Cplx	Genbank
Escherichia coli HVH 116 (4-6879942) acYxR-supercont1.13.C36	AVWF01000001..AVWF01000036	73	ST73 Cplx	Genbank
Escherichia coli HVH 117 (4-6857191) acXuE-supercont1.20.C38	AVWG01000001..AVWG01000038	73	ST73 Cplx	Genbank
Escherichia coli HVH 118 (4-7345399) acXtu-supercont1.16.C41	AVWH01000001..AVWH01000041	95	ST95 Cplx	Genbank
Escherichia coli HVH 119 (4-6879578) acYyF-supercont1.12.C27	AVWI01000001..AVWI01000027	69	ST69 Cplx	Genbank
Escherichia coli HVH 12 (4-7653042) acXtJ-supercont1.9.C59	AVTG01000001..AVTG01000059	95	ST95 Cplx	Genbank
Escherichia coli HVH 120 (4-6978681) acYxq-supercont1.10.C34	AVWJ01000001..AVWJ01000034	73	ST73 Cplx	Genbank
Escherichia coli HVH 121 (4-6877826) acYyO-supercont1.12.C60	AVWK01000001..AVWK01000060	88	ST23 Cplx	Genbank
Escherichia coli HVH 122 (4-6851606) acYzL-supercont1.14.C27	AVWL01000001..AVWL01000027	69	ST69 Cplx	Genbank
Escherichia coli HVH 125 (4-2634716) acYzS-supercont1.14.C39	AVWM01000001..AVWM01000039	80	ST568 Cplx	Genbank
Escherichia coli HVH 126 (4-6034225) acYyE-supercont1.19.C59	AVWN01000001..AVWN01000059	95	ST95 Cplx	Genbank
Escherichia coli HVH 127 (4-7303629) acYxH-supercont1.18.C65	AVWO01000001..AVWO01000065	95	ST95 Cplx	Genbank
Escherichia coli HVH 128 (4-7030436) acYxJ-supercont1.16.C54	AVWP01000001..AVWP01000054	1057	-	Genbank
Escherichia coli HVH 13 (4-7634056) acXul-supercont1.23.C66	AVTH01000001..AVTH01000066	73	ST73 Cplx	Genbank
Escherichia coli HVH 130 (4-7036876) acYyP-supercont1.22.C90	AVWQ01000001..AVWQ01000090	69	ST69 Cplx	Genbank
Escherichia coli HVH 132 (4-6876862) acYAo-supercont1.17.C44	AVWR01000001..AVWR01000044	73	ST73 Cplx	Genbank
Escherichia coli HVH 133 (4-4466519) acYxY-supercont1.8.C21	AVWS01000001..AVWS01000021	69	ST69 Cplx	Genbank
Escherichia coli HVH 134 (4-6073441) acYzK-supercont1.5.C21	AVWT01000001..AVWT01000021	69	ST69 Cplx	Genbank
Escherichia coli HVH 135 (4-4449320) acYxa-supercont1.9.C12	AVWU01000001..AVWU01000012	69	ST69 Cplx	Genbank
Escherichia coli HVH 136 (4-5970458) acXuU-supercont1.14.C47	AVWV01000001..AVWV01000047	393	ST31 Cplx	Genbank
Escherichia coli HVH 137 (4-2124971) acYAn-supercont1.8.C27	AVWW01000001..AVWW01000027	95	ST95 Cplx	Genbank
Escherichia coli HVH 138 (4-6066704) acYyz-supercont1.11.C38	AVWX01000001..AVWX01000038	12	ST12 Cplx	Genbank
Escherichia coli HVH 139 (4-3192644) acYzg-supercont1.47.C79	AVWY01000001..AVWY01000079	2520	-	Genbank
Escherichia coli HVH 140 (4-5894387) acYxe-supercont1.4.C31	AVWZ01000001..AVWZ01000031	69	ST69 Cplx	Genbank
Escherichia coli HVH 141 (4-5995973) acYxX-supercont1.5.C31	AVXA01000001..AVXA01000031	131	ST131 Cplx	Genbank
Escherichia coli HVH 142 (4-5627451) acYyR-supercont1.24.C58	AVXB01000001..AVXB01000058	73	ST73 Cplx	Genbank
Escherichia coli HVH 143 (4-5674999) acXur-supercont1.10.C35	AVXC01000001..AVXC01000035	12	ST12 Cplx	Genbank
Escherichia coli HVH 144 (4-4451937) acYwC-supercont1.12.C46	AVXD01000001..AVXD01000046	73	ST73 Cplx	Genbank
Escherichia coli HVH 145 (4-5672112) acYxw-supercont1.4.C15	AVXE01000001..AVXE01000015	69	ST69 Cplx	Genbank
Escherichia coli HVH 146 (4-3189767) acYwF-supercont1.7.C47	AVXF01000001..AVXF01000047	131	ST131 Cplx	Genbank
Escherichia coli HVH 147 (4-5893887) acYxy-supercont1.3.C28	AVXG01000001..AVXG01000028	1798	-	Genbank
Escherichia coli HVH 148 (4-3192490) acYxh-supercont1.13.C75	AVXH01000001..AVXH01000075	95	ST95 Cplx	Genbank
Escherichia coli HVH 149 (4-4451880) acYyI-supercont1.15.C37	AVXI01000001..AVXI01000037	73	ST73 Cplx	Genbank
Escherichia coli HVH 150 (4-3258106) acYAv-supercont1.11.C67	AVXJ01000001..AVXJ01000067	88	ST23 Cplx	Genbank
Escherichia coli HVH 151 (4-5755573) acYzo-supercont1.10.C41	AVXK01000001..AVXK01000041	69	ST69 Cplx	Genbank
Escherichia coli HVH 152 (4-3447545) acYwU-supercont1.53.C134	AVXL01000001..AVXL01000134	93	ST168 Cplx	Genbank
Escherichia coli HVH 153 (3-9344314) acYxl-supercont1.14.C45	AVXM01000001..AVXM01000045	372	-	Genbank
Escherichia coli HVH 154 (4-5636698) acYxu-supercont1.49.C104	AVXN01000001..AVXN01000104	131	ST131 Cplx	Genbank
Escherichia coli HVH 155 (4-4509048) acYzt-supercont1.9.C16	AVXO01000001..AVXO01000016	69	ST69 Cplx	Genbank
Escherichia coli HVH 156 (4-3206505) acYwP-supercont1.13.C34	AVXP01000001..AVXP01000034	73	ST73 Cplx	Genbank
Escherichia coli HVH 157 (4-3406229) acXuI-supercont1.23.C64	AVXQ01000001..AVXQ01000064	73	ST73 Cplx	Genbank
Escherichia coli HVH 158 (4-3224287) acYyQ-supercont1.6.C42	AVXR01000001..AVXR01000042	144	-	Genbank
Escherichia coli HVH 159 (4-5818141) acXuo-supercont1.13.C44	AVXS01000001..AVXS01000044	73	ST73 Cplx	Genbank
Escherichia coli HVH 16 (4-7649002) acXtT-supercont1.11.C47	AVTI01000001..AVTI01000047	73	ST73 Cplx	Genbank
Escherichia coli HVH 160 (4-5695937) acYyb-supercont1.12.C46	AVXT01000001..AVXT01000046	73	ST73 Cplx	Genbank
Escherichia coli HVH 161 (4-3119890) acYwI-supercont1.16.C55	AVXU01000001..AVXU01000055	73	ST73 Cplx	Genbank
Escherichia coli HVH 162 (4-5627982) acYxo-supercont1.26.C69	AVXV01000001..AVXV01000069	91	-	Genbank
Escherichia coli HVH 163 (4-4697553) acYzB-supercont1.9.C17	AVXW01000001..AVXW01000017	69	ST69 Cplx	Genbank
Escherichia coli HVH 164 (4-5953081) acYwz-supercont1.8.C40	AVXX01000001..AVXX01000040	10	ST10 Cplx	Genbank
Escherichia coli HVH 167 (4-6073565) acYxA-supercont1.5.C13	AVXY01000001..AVXY01000013	69	ST69 Cplx	Genbank
Escherichia coli HVH 169 (4-1075578) acYxS-supercont1.13.C47	AVXZ01000001..AVXZ01000047	73	ST73 Cplx	Genbank
Escherichia coli HVH 17 (4-7473087) acXuH-supercont1.18.C59	AVTJ01000001..AVTJ01000059	131	ST131 Cplx	Genbank
Escherichia coli HVH 170 (4-3026949) acYyK-supercont1.13.C73	AVYA01000001..AVYA01000073	95	ST95 Cplx	Genbank
Escherichia coli HVH 171 (4-3191958) acYxC-supercont1.15.C27	AVYB01000001..AVYB01000027	12	ST12 Cplx	Genbank
Escherichia coli HVH 172 (4-3248542) acYwN-supercont1.17.C45	AVYC01000001..AVYC01000045	73	ST73 Cplx	Genbank
Escherichia coli HVH 173 (3-9175482) acXud-supercont1.9.C14	AVYD01000001..AVYD01000014	69	ST69 Cplx	Genbank
Escherichia coli HVH 175 (4-3405184) acYwQ-supercont1.21.C46	AVYE01000001..AVYE01000046	144	-	Genbank
Escherichia coli HVH 176 (4-3428664) acYxF-supercont1.13.C44	AVYF01000001..AVYF01000044	131	ST131 Cplx	Genbank
Escherichia coli HVH 177 (4-2876612) adibN-supercont1.8.C19	AZJM01000001..AZJM01000019	131	ST131 Cplx	Genbank
Escherichia coli HVH 178 (4-3189163) acYyx-supercont1.7.C49	AVYG01000001..AVYG01000049	95	ST95 Cplx	Genbank
Escherichia coli HVH 18 (4-8589585) acXvg-supercont1.29.C87	AVTK01000001..AVTK01000087	88	ST23 Cplx	Genbank
Escherichia coli HVH 180 (4-3051617) acYzq-supercont1.12.C38	AVYH01000001..AVYH01000038	95	ST95 Cplx	Genbank
Escherichia coli HVH 182 (4-0985554) acYAr-supercont1.15.C43	AVYI01000001..AVYI01000043	393	ST31 Cplx	Genbank
Escherichia coli HVH 183 (4-3205932) acYze-supercont1.14.C34	AVYJ01000001..AVYJ01000034	69	ST69 Cplx	Genbank
Escherichia coli HVH 184 (4-3343286) acXuL-supercont1.23.C50	AVYK01000001..AVYK01000050	144	-	Genbank
Escherichia coli HVH 185 (4-2876639) acXuK-supercont1.11.C47	AVYL01000001..AVYL01000047	127	-	Genbank
Escherichia coli HVH 186 (4-3405044) acYzO-supercont1.56.C116	AVYM01000001..AVYM01000116	131	ST131 Cplx	Genbank
Escherichia coli HVH 187 (4-4471660) acYzF-supercont1.16.C72	AVYN01000001..AVYN01000072	62	-	Genbank
Escherichia coli HVH 188 (4-2356988) acYxb-supercont1.9.C33	AVYO01000001..AVYO01000033	117	-	Genbank
Escherichia coli HVH 189 (4-3220125) acYAf-supercont1.19.C63	AVYP01000001..AVYP01000063	69	ST69 Cplx	Genbank
Escherichia coli HVH 19 (4-7154984) acXuW-supercont1.23.C92	AVTL01000001..AVTL01000092	95	ST95 Cplx	Genbank
Escherichia coli HVH 190 (4-3255514) acYyy-supercont1.6.C18	AVYQ01000001..AVYQ01000018	1851	-	Genbank
Escherichia coli HVH 191 (3-9341900) acYxn-supercont1.18.C59	AVYR01000001..AVYR01000059	95	ST95 Cplx	Genbank
Escherichia coli HVH 192 (4-3054470) acYwX-supercont1.7.C33	AVYS01000001..AVYS01000033	95	ST95 Cplx	Genbank
Escherichia coli HVH 193 (4-3331423) acXuh-supercont1.4.C31	AVYT01000001..AVYT01000031	3672	-	Genbank
Escherichia coli HVH 194 (4-2356805) acYzA-supercont1.7.C37	AVYU01000001..AVYU01000037	144	-	Genbank
Escherichia coli HVH 195 (3-7155360) acYyq-supercont1.2.C27	AVYV01000001..AVYV01000027	1248	-	Genbank
Escherichia coli HVH 196 (4-4530470) acYzb-supercont1.8.C20	AVYW01000001..AVYW01000020	421	ST95 Cplx	Genbank
Escherichia coli HVH 197 (4-4466217) acYwE-supercont1.12.C66	AVYX01000001..AVYX01000066	12	ST12 Cplx	Genbank
Escherichia coli HVH 198 (4-3206106) acYyf-supercont1.12.C32	AVYY01000001..AVYY01000032	363	-	Genbank
Escherichia coli HVH 199 (4-5670322) acYyk-supercont1.5.C26	AVYZ01000001..AVYZ01000026	95	ST95 Cplx	Genbank
Escherichia coli HVH 2 (4-6943160) acXuV-supercont1.19.C44	AVSY01000001..AVSY01000044	73	ST73 Cplx	Genbank
Escherichia coli HVH 20 (4-5865042) acXuS-supercont1.14.C48	AVTM01000001..AVTM01000048	73	ST73 Cplx	Genbank
Escherichia coli HVH 200 (4-4449924) acYzj-supercont1.15.C48	AVZA01000001..AVZA01000048	1480	-	Genbank
Escherichia coli HVH 201 (4-4459431) acYwB-supercont1.6.C26	AVZB01000001..AVZB01000026	95	ST95 Cplx	Genbank
Escherichia coli HVH 202 (4-3163997) acYyJ-supercont1.10.C44	AVZC01000001..AVZC01000044	131	ST131 Cplx	Genbank
Escherichia coli HVH 203 (4-3126218) acXue-supercont1.3.C19	AVZD01000001..AVZD01000019	95	ST95 Cplx	Genbank
Escherichia coli HVH 204 (4-3112802) acXuB-supercont1.8.C36	AVZE01000001..AVZE01000036	73	ST73 Cplx	Genbank
Escherichia coli HVH 205 (4-3094677) acYwG-supercont1.13.C44	AVZF01000001..AVZF01000044	131	ST131 Cplx	Genbank
Escherichia coli HVH 206 (4-3128229) acYwH-supercont1.11.C17	AVZG01000001..AVZG01000017	69	ST69 Cplx	Genbank
Escherichia coli HVH 207 (4-3113221) acYza-supercont1.8.C35	AVZH01000001..AVZH01000035	73	ST73 Cplx	Genbank
Escherichia coli HVH 208 (4-3112292) acYzI-supercont1.14.C17	AVZI01000001..AVZI01000017	69	ST69 Cplx	Genbank
Escherichia coli HVH 209 (4-3062651) acYyV-supercont1.4.C29	AVZJ01000001..AVZJ01000029	43	ST10 Cplx	Genbank
Escherichia coli HVH 21 (4-4517873) acXuD-supercont1.16.C54	AVTN01000001..AVTN01000054	827	-	Genbank
Escherichia coli HVH 210 (4-3042480) acYzz-supercont1.10.C29	AVZK01000001..AVZK01000029	95	ST95 Cplx	Genbank
Escherichia coli HVH 211 (4-3041891) acYwu-supercont1.16.C44	AVZL01000001..AVZL01000044	95	ST95 Cplx	Genbank
Escherichia coli HVH 212 (3-9305343) acYxO-supercont1.20.C49	AVZM01000001..AVZM01000049	73	ST73 Cplx	Genbank
Escherichia coli HVH 213 (4-3042928) acYwA-supercont1.14.C52	AVZN01000001..AVZN01000052	404	ST14 Cplx	Genbank
Escherichia coli HVH 214 (4-3062198) adibJ-supercont1.9.C13	AZJN01000001..AZJN01000013	95	ST95 Cplx	Genbank
Escherichia coli HVH 215 (4-3008371) acYyM-supercont1.5.C11	AVZO01000001..AVZO01000011	69	ST69 Cplx	Genbank
Escherichia coli HVH 216 (4-3042952) acYzZ-supercont1.18.C37	AVZP01000001..AVZP01000037	73	ST73 Cplx	Genbank
Escherichia coli HVH 217 (4-1022806) acYyu-supercont1.17.C43	AVZQ01000001..AVZQ01000043	95	ST95 Cplx	Genbank
Escherichia coli HVH 218 (4-4500903) acYyW-supercont1.20.C38	AVZR01000001..AVZR01000038	73	ST73 Cplx	Genbank
Escherichia coli HVH 22 (4-2258986) acXtX-supercont1.7.C16	AVTO01000001..AVTO01000016	5355	-	Genbank
Escherichia coli HVH 220 (4-5876842) acYxG-supercont1.23.C54	AVZS01000001..AVZS01000054	73	ST73 Cplx	Genbank
Escherichia coli HVH 221 (4-3136817) acYAh-supercont1.6.C76	AVZT01000001..AVZT01000076	398	ST398 Cplx	Genbank
Escherichia coli HVH 222 (4-2977443) acYyi-supercont1.18.C66	AVZU01000001..AVZU01000066	95	ST95 Cplx	Genbank
Escherichia coli HVH 223 (4-2976528) acYzH-supercont1.25.C48	AVZV01000001..AVZV01000048	69	ST69 Cplx	Genbank
Escherichia coli HVH 225 (4-1273116) acYwx-supercont1.26.C65	AVZW01000001..AVZW01000065	NT	-	Genbank
Escherichia coli HVH 227 (4-2277670) acYzu-supercont1.19.C40	AVZX01000001..AVZX01000040	73	ST73 Cplx	Genbank
Escherichia coli HVH 228 (4-7787030) acYyr-supercont1.11.C25	AVZY01000001..AVZY01000025	12	ST12 Cplx	Genbank
Escherichia coli HVH 23 (4-6066488) adibK-supercont1.18.C33	AZJK01000001..AZJK01000033	1618	-	Genbank
Escherichia coli HVH 24 (4-5985145) acXtE-supercont1.4.C28	AVTP01000001..AVTP01000028	4612	-	Genbank
Escherichia coli HVH 25 (4-5851939) acXtx-supercont1.26.C93	AVTQ01000001..AVTQ01000093	405	ST405 Cplx	Genbank
Escherichia coli HVH 26 (4-5703913) acXtt-supercont1.16.C74	AVTR01000001..AVTR01000074	550	ST14 Cplx	Genbank
Escherichia coli HVH 27 (4-7449267) acXuZ-supercont1.15.C41	AVTS01000001..AVTS01000041	73	ST73 Cplx	Genbank
Escherichia coli HVH 28 (4-0907367) acXtI-supercont1.7.C35	AVTT01000001..AVTT01000035	127	-	Genbank
Escherichia coli HVH 29 (4-3418073) acXuN-supercont1.7.C13	AVTU01000001..AVTU01000013	69	ST69 Cplx	Genbank
Escherichia coli HVH 3 (4-7276001) acYzn-supercont1.18.C73	AVSZ01000001..AVSZ01000073	95	ST95 Cplx	Genbank
Escherichia coli HVH 30 (4-2661829) acXtW-supercont1.15.C42	AVTV01000001..AVTV01000042	95	ST95 Cplx	Genbank
Escherichia coli HVH 31 (4-2602156) acXtL-supercont1.6.C44	AVTW01000001..AVTW01000044	73	ST73 Cplx	Genbank
Escherichia coli HVH 32 (4-3773988) acXtQ-supercont1.10.C41	AVTX01000001..AVTX01000041	95	ST95 Cplx	Genbank
Escherichia coli HVH 33 (4-2174936) acXuc-supercont1.7.C29	AVTY01000001..AVTY01000029	88	ST23 Cplx	Genbank
Escherichia coli HVH 35 (4-2962667) acXva-supercont1.14.C38	AVTZ01000001..AVTZ01000038	95	ST95 Cplx	Genbank
Escherichia coli HVH 36 (4-5675286) addTA-supercont1.15.C59	AYLQ01000001..AYLQ01000059	443	ST205 Cplx	Genbank
Escherichia coli HVH 37 (4-2773848) acXuq-supercont1.13.C39	AVUA01000001..AVUA01000039	73	ST73 Cplx	Genbank
Escherichia coli HVH 38 (4-2774682) acXtD-supercont1.16.C68	AVUB01000001..AVUB01000068	141	-	Genbank
Escherichia coli HVH 39 (4-2679949) acXup-supercont1.19.C41	AVUC01000001..AVUC01000041	73	ST73 Cplx	Genbank
Escherichia coli HVH 4 (4-7276109) acXtw-supercont1.15.C47	AVTA01000001..AVTA01000047	12	ST12 Cplx	Genbank
Escherichia coli HVH 40 (4-1219782) acXtB-supercont1.8.C31	AVUD01000001..AVUD01000031	73	ST73 Cplx	Genbank
Escherichia coli HVH 41 (4-2677849) acYwL-supercont1.21.C88	AVUE01000001..AVUE01000088	38	ST38 Cplx	Genbank
Escherichia coli HVH 42 (4-2100061) acYxf-supercont1.8.C37	AVUF01000001..AVUF01000037	95	ST95 Cplx	Genbank
Escherichia coli HVH 43 (4-2173468) acXtF-supercont1.8.C55	AVUG01000001..AVUG01000055	5412	-	Genbank
Escherichia coli HVH 44 (4-2298570) acXtG-supercont1.8.C41	AVUH01000001..AVUH01000041	393	ST31 Cplx	Genbank
Escherichia coli HVH 45 (4-3129918) acXuF-supercont1.11.C30	AVUI01000001..AVUI01000030	69	ST69 Cplx	Genbank
Escherichia coli HVH 46 (4-2758776) acXtK-supercont1.18.C43	AVUJ01000001..AVUJ01000043	372	-	Genbank
Escherichia coli HVH 48 (4-2658593) acXvj-supercont1.6.C24	AVUK01000001..AVUK01000024	95	ST95 Cplx	Genbank
Escherichia coli HVH 5 (4-7148410) acXtR-supercont1.6.C32	AVTB01000001..AVTB01000032	95	ST95 Cplx	Genbank
Escherichia coli HVH 50 (4-2593475) addTa-supercont1.9.C94	AYHF01000001..AYHF01000094	409	-	Genbank
Escherichia coli HVH 51 (4-2172526) acXvd-supercont1.10.C48	AVUL01000001..AVUL01000048	5274	-	Genbank
Escherichia coli HVH 53 (4-0631051) acYww-supercont1.11.C76	AVUM01000001..AVUM01000076	62	-	Genbank
Escherichia coli HVH 55 (4-2646161) acXtz-supercont1.5.C41	AVUN01000001..AVUN01000041	537	ST14 Cplx	Genbank
Escherichia coli HVH 56 (4-2153033) acXtC-supercont1.9.C33	AVUO01000001..AVUO01000033	127	-	Genbank
Escherichia coli HVH 58 (4-2839709) acXtA-supercont1.6.C28	AVUP01000001..AVUP01000028	73	ST73 Cplx	Genbank
Escherichia coli HVH 59 (4-1119338) acXty-supercont1.18.C62	AVUQ01000001..AVUQ01000062	95	ST95 Cplx	Genbank
Escherichia coli HVH 6 (3-8296502) acXvb-supercont1.14.C47	AVTC01000001..AVTC01000047	362	-	Genbank
Escherichia coli HVH 61 (4-2736020) acXuf-supercont1.8.C29	AVUR01000001..AVUR01000029	73	ST73 Cplx	Genbank
Escherichia coli HVH 63 (4-2542528) acXuC-supercont1.12.C27	AVUS01000001..AVUS01000027	69	ST69 Cplx	Genbank
Escherichia coli HVH 65 (4-2262045) acXuy-supercont1.6.C58	AVUT01000001..AVUT01000058	405	ST405 Cplx	Genbank
Escherichia coli HVH 68 (4-0888028) acXvi-supercont1.14.C39	AVUU01000001..AVUU01000039	73	ST73 Cplx	Genbank
Escherichia coli HVH 69 (4-2837072) acXus-supercont1.10.C19	AVUV01000001..AVUV01000019	69	ST69 Cplx	Genbank
Escherichia coli HVH 7 (4-7315031) acXuQ-supercont1.23.C55	AVTD01000001..AVTD01000055	73	ST73 Cplx	Genbank
Escherichia coli HVH 70 (4-2963531) acXui-supercont1.23.C62	AVUW01000001..AVUW01000062	144	-	Genbank
Escherichia coli HVH 73 (4-2393174) acXtN-supercont1.13.C55	AVUX01000001..AVUX01000055	95	ST95 Cplx	Genbank
Escherichia coli HVH 74 (4-1034782) acXuJ-supercont1.15.C38	AVUY01000001..AVUY01000038	73	ST73 Cplx	Genbank
Escherichia coli HVH 76 (4-2538717) acXuA-supercont1.6.C35	AVUZ01000001..AVUZ01000035	95	ST95 Cplx	Genbank
Escherichia coli HVH 77 (4-2605759) acYwV-supercont1.58.C87	AVVA01000001..AVVA01000087	73	ST73 Cplx	Genbank
Escherichia coli HVH 78 (4-2735946) acXtv-supercont1.16.C57	AVVB01000001..AVVB01000057	12	ST12 Cplx	Genbank
Escherichia coli HVH 79 (4-2512823) acXum-supercont1.13.C72	AVVC01000001..AVVC01000072	117	-	Genbank
Escherichia coli HVH 80 (4-2428830) acYAc-supercont1.14.C37	AVVD01000001..AVVD01000037	390	ST95 Cplx	Genbank
Escherichia coli HVH 82 (4-2209276) acYwv-supercont1.14.C54	AVVE01000001..AVVE01000054	5440	-	Genbank
Escherichia coli HVH 83 (4-2051087) adibM-supercont1.18.C32	AZJL01000001..AZJL01000032	73	ST73 Cplx	Genbank
Escherichia coli HVH 84 (4-1021478) acXuY-supercont1.7.C46	AVVF01000001..AVVF01000046	131	ST131 Cplx	Genbank
Escherichia coli HVH 85 (4-0792144) acXtV-supercont1.10.C24	AVVG01000001..AVVG01000024	69	ST69 Cplx	Genbank
Escherichia coli HVH 86 (4-7026218) acXtM-supercont1.19.C68	AVVH01000001..AVVH01000068	73	ST73 Cplx	Genbank
Escherichia coli HVH 87 (4-5977630) acYxv-supercont1.24.C84	AVVI01000001..AVVI01000084	59	ST59 Cplx	Genbank
Escherichia coli HVH 88 (4-5854636) acYxQ-supercont1.12.C51	AVVJ01000001..AVVJ01000051	69	ST69 Cplx	Genbank
Escherichia coli HVH 89 (4-5885604) acXtY-supercont1.9.C32	AVVK01000001..AVVK01000032	73	ST73 Cplx	Genbank
Escherichia coli HVH 9 (4-6942539) acXug-supercont1.6.C31	AVTE01000001..AVTE01000031	135	-	Genbank
Escherichia coli HVH 90 (4-3191362) acXuz-supercont1.5.C31	AVVL01000001..AVVL01000031	131	ST131 Cplx	Genbank
Escherichia coli HVH 91 (4-4638751) acXuT-supercont1.13.C93	AVVM01000001..AVVM01000093	398	ST398 Cplx	Genbank
Escherichia coli HVH 92 (4-5930790) acXuk-supercont1.10.C71	AVVN01000001..AVVN01000071	73	ST73 Cplx	Genbank
Escherichia coli HVH 95 (4-6074464) acXtS-supercont1.18.C62	AVVO01000001..AVVO01000062	73	ST73 Cplx	Genbank
Escherichia coli HVH 96 (4-5934869) acXvc-supercont1.12.C68	AVVP01000001..AVVP01000068	73	ST73 Cplx	Genbank
Escherichia coli HVH 98 (4-5799287) addUI-supercont1.19.C61	AYHG01000001..AYHG01000061	101	ST101 Cplx	Genbank
Escherichia coli IAI1	CU928160	1128	-	Genbank
Escherichia coli IAI39	CU928164	62	-	Genbank
Escherichia coli IHE3034	CP001969	95	ST95 Cplx	Genbank
Escherichia coli IMT2125 genomic chromosome, IMT2125	HE964769	23	ST23 Cplx	Genbank
Escherichia coli IMT8073	ASXQ00000000.1	794	-	Genbank
Escherichia coli IS1	CBWA000000000.1	38	ST38 Cplx	Genbank
Escherichia coli IS25	CBWG000000000.1	167	ST10 Cplx	Genbank
Escherichia coli IS29	CBWH000000000.1	131	ST131 Cplx	Genbank
Escherichia coli IS35	CBWJ000000000.1	131	ST131 Cplx	Genbank
Escherichia coli IS5	CBWB000000000.1	648	ST648 Cplx	Genbank
Escherichia coli IS9	CBWC000000000.1	847	-	Genbank
Escherichia coli ISC11	CBWP000000000.1	NT	-	Genbank
Escherichia coli ISC41	CBWR000000000.1	NT	-	Genbank
Escherichia coli ISC56	CBWT000000000.1	NT	-	Genbank
Escherichia coli ISC7	CBWN000000000.1	NT	-	Genbank
Escherichia coli J53 1.ECJ53.1_44	AICK01000001..AICK01000042	10	ST10 Cplx	Genbank
Escherichia coli J96 Chrom_contig262	ALIN02000001..ALIN02000276	12	ST12 Cplx	Genbank
Escherichia coli JB1-95 ctg7180000005846	AEZV02000001..AEZV02000143	294	ST29 Cplx	Genbank
Escherichia coli JCM 18426	BAKT00000000.1	NT	-	Genbank
Escherichia coli JCM 20135	BAKV00000000.1	NT	-	Genbank
Escherichia coli JCM 5491	BAKY00000000.1	73	ST73 Cplx	Genbank
Escherichia coli JJ1886	CP006784..CP006789	131	ST131 Cplx	Genbank
Escherichia coli Jurua 18/11 gecJurua18.contig.30	AQFB01000001..AQFB01000031	423	ST23 Cplx	Genbank
Escherichia coli Jurua 20/10 gecJurua20.contig.56	AQFA01000001..AQFA01000057	173	-	Genbank
Escherichia coli K02 adHqK-supercont1.18.C31	JHPO01000001..JHPO01000031	491	-	Genbank
Escherichia coli KD1 contig00211	AJWO01000001..AJWO01000157	136	-	Genbank
Escherichia coli KD2 contig00335	AJWP01000001..AJWP01000264	68	-	Genbank
Escherichia coli KO11	CP002516..CP002518	1079	-	Genbank
Escherichia coli KO11FL	CP002970..CP002971	1079	-	Genbank
Escherichia coli KOEGE 10 (25a) acYzM-supercont1.17.C71	AWAB01000001..AWAB01000071	703	-	Genbank
Escherichia coli KOEGE 118 (317a) acYxt-supercont1.4.C38	AWAR01000001..AWAR01000038	1670	-	Genbank
Escherichia coli KOEGE 131 (358a) acYwW-supercont1.8.C34	AWAS01000001..AWAS01000034	410	ST23 Cplx	Genbank
Escherichia coli KOEGE 3 (4a) acYzW-supercont1.13.C57	AVZZ01000001..AVZZ01000057	542	-	Genbank
Escherichia coli KOEGE 30 (63a) acYAs-supercont1.12.C31	AWAC01000001..AWAC01000031	127	-	Genbank
Escherichia coli KOEGE 32 (66a) acYyn-supercont1.9.C38	AWAD01000001..AWAD01000038	95	ST95 Cplx	Genbank
Escherichia coli KOEGE 33 (68a) acYxT-supercont1.20.C42	AWAE01000001..AWAE01000042	58	ST155 Cplx	Genbank
Escherichia coli KOEGE 40 (102a) acYyS-supercont1.6.C41	AWAF01000001..AWAF01000041	93	ST168 Cplx	Genbank
Escherichia coli KOEGE 43 (105a) acYzR-supercont1.20.C40	AWAG01000001..AWAG01000040	73	ST73 Cplx	Genbank
Escherichia coli KOEGE 44 (106a) acYyZ-supercont1.11.C31	AWAH01000001..AWAH01000031	2013	-	Genbank
Escherichia coli KOEGE 56 (169a) acYAa-supercont1.23.C54	AWAI01000001..AWAI01000054	80	ST568 Cplx	Genbank
Escherichia coli KOEGE 58 (171a) acYAA-supercont1.15.C45	AWAJ01000001..AWAJ01000045	127	-	Genbank
Escherichia coli KOEGE 61 (174a) acYyB-supercont1.9.C28	AWAK01000001..AWAK01000028	5369	-	Genbank
Escherichia coli KOEGE 62 (175a) acYzP-supercont1.6.C33	AWAL01000001..AWAL01000033	69	ST69 Cplx	Genbank
Escherichia coli KOEGE 68 (182a) acYzy-supercont1.8.C28	AWAM01000001..AWAM01000028	69	ST69 Cplx	Genbank
Escherichia coli KOEGE 7 (16a) acYxM-supercont1.21.C49	AWAA01000001..AWAA01000049	93	ST168 Cplx	Genbank
Escherichia coli KOEGE 70 (185a) acYzD-supercont1.15.C36	AWAN01000001..AWAN01000036	127	-	Genbank
Escherichia coli KOEGE 71 (186a) acYxK-supercont1.12.C24	AWAO01000001..AWAO01000024	5371	-	Genbank
Escherichia coli KOEGE 73 (195a) acYxc-supercont1.11.C26	AWAP01000001..AWAP01000026	69	ST69 Cplx	Genbank
Escherichia coli KOEGE 77 (202a) acYAg-supercont1.11.C56	AWAQ01000001..AWAQ01000056	405	ST405 Cplx	Genbank
Escherichia coli KTE1 acHbz-supercont1.15.C59	ASTN01000001..ASTN01000059	69	ST69 Cplx	Genbank
Escherichia coli KTE10 acEvd-supercont1.9.C56	ANSQ01000001..ANSQ01000056	1316	-	Genbank
Escherichia coli KTE100 acHbI-supercont1.5.C66	ASVF01000001..ASVF01000066	399	ST399 Cplx	Genbank
Escherichia coli KTE101 acASP-supercont1.6.C41	ANWD01000001..ANWD01000041	316	ST278 Cplx	Genbank
Escherichia coli KTE102 acHaG-supercont1.8.C64	ASVG01000001..ASVG01000064	120	-	Genbank
Escherichia coli KTE103 acHbu-supercont1.24.C109	ASVH01000001..ASVH01000109	4358	-	Genbank
Escherichia coli KTE104 acwor-supercont1.110.C111	ANXL01000001..ANXL01000111	12	ST12 Cplx	Genbank
Escherichia coli KTE105 acwoU-supercont1.99	ANXM01000001..ANXM01000099	69	ST69 Cplx	Genbank
Escherichia coli KTE106 acwoD-supercont1.132	ANXN01000001..ANXN01000132	3352	-	Genbank
Escherichia coli KTE107 acHbE-supercont1.18.C91	ASVI01000001..ASVI01000091	5523	-	Genbank
Escherichia coli KTE108 acHby-supercont1.7.C86	ASVJ01000001..ASVJ01000086	5295	-	Genbank
Escherichia coli KTE109 acwow-supercont1.52	ANXO01000001..ANXO01000052	978	-	Genbank
Escherichia coli KTE11 acEuU-supercont1.7.C47	ANSR01000001..ANSR01000047	5463	-	Genbank
Escherichia coli KTE111 acEnT-supercont1.7.C68	ANUX01000001..ANUX01000068	10	ST10 Cplx	Genbank
Escherichia coli KTE112 acwoA-supercont1.177	ANXP01000001..ANXP01000177	543	-	Genbank
Escherichia coli KTE113 acwoG-supercont1.87	ANXQ01000001..ANXQ01000087	141	-	Genbank
Escherichia coli KTE114 acHaN-supercont1.12.C37	ASTS01000001..ASTS01000037	3568	-	Genbank
Escherichia coli KTE115 acATp-supercont1.5.C32	ANWE01000001..ANWE01000032	963	-	Genbank
Escherichia coli KTE116 acEvn-supercont1.6.C51	ANUY01000001..ANUY01000051	69	ST69 Cplx	Genbank
Escherichia coli KTE117 acwoL-supercont1.94	ANXR01000001..ANXR01000094	3018	-	Genbank
Escherichia coli KTE118 acASK-supercont1.3.C22	ANWF01000001..ANWF01000022	95	ST95 Cplx	Genbank
Escherichia coli KTE119 acEnY-supercont1.6.C62	ANUZ01000001..ANUZ01000062	540	-	Genbank
Escherichia coli KTE12 acEnP-supercont1.17.C53	ANSS01000001..ANSS01000053	767	-	Genbank
Escherichia coli KTE120 acwoy-supercont1.189.C190	ANXS01000001..ANXS01000190	10	ST10 Cplx	Genbank
Escherichia coli KTE121 acHaE-supercont1.6.C68	ASVK01000001..ASVK01000068	38	ST38 Cplx	Genbank
Escherichia coli KTE122 acwoo-supercont1.150.C151	ANXT01000001..ANXT01000151	69	ST69 Cplx	Genbank
Escherichia coli KTE123 acASj-supercont1.5.C25	ANWG01000001..ANWG01000025	95	ST95 Cplx	Genbank
Escherichia coli KTE124 acwox-supercont1.127	ANXU01000001..ANXU01000127	73	ST73 Cplx	Genbank
Escherichia coli KTE125 acwoH-supercont1.115.C116	ANXV01000001..ANXV01000116	393	ST31 Cplx	Genbank
Escherichia coli KTE126 acHbt-supercont1.10.C39	ASVL01000001..ASVL01000039	567	-	Genbank
Escherichia coli KTE127 acHaV-supercont1.9.C74	ASVM01000001..ASVM01000074	69	ST69 Cplx	Genbank
Escherichia coli KTE128 acwon-supercont1.139	ANXW01000001..ANXW01000139	69	ST69 Cplx	Genbank
Escherichia coli KTE129 acwop-supercont1.136	ANXX01000001..ANXX01000136	404	ST14 Cplx	Genbank
Escherichia coli KTE13 acHbv-supercont1.9.C40	ASTQ01000001..ASTQ01000040	767	-	Genbank
Escherichia coli KTE130 acHbk-supercont1.19.C114	ASVN01000001..ASVN01000114	1286	-	Genbank
Escherichia coli KTE131 acwou-supercont1.100	ANXY01000001..ANXY01000100	127	-	Genbank
Escherichia coli KTE132 acHaT-supercont1.15.C90	ASVO01000001..ASVO01000090	1286	-	Genbank
Escherichia coli KTE133 acwoF-supercont1.66	ANXZ01000001..ANXZ01000066	998	-	Genbank
Escherichia coli KTE134 acHzL-supercont1.10.C50	ASVP01000001..ASVP01000050	69	ST69 Cplx	Genbank
Escherichia coli KTE135 acASy-supercont1.2.C33	ANWH01000001..ANWH01000033	5478	-	Genbank
Escherichia coli KTE136 acASw-supercont1.7.C32	ANWI01000001..ANWI01000032	58	ST155 Cplx	Genbank
Escherichia coli KTE137 acwoT-supercont1.99	ANYA01000001..ANYA01000099	73	ST73 Cplx	Genbank
Escherichia coli KTE138 acwoR-supercont1.81	ANYB01000001..ANYB01000081	2351	-	Genbank
Escherichia coli KTE139 acwoz-supercont1.108	ANYC01000001..ANYC01000108	131	ST131 Cplx	Genbank
Escherichia coli KTE14 acHbn-supercont1.27.C92	ASTU01000001..ASTU01000092	10	ST10 Cplx	Genbank
Escherichia coli KTE140 acATa-supercont1.5.C33	ANWJ01000001..ANWJ01000033	394	ST394 Cplx	Genbank
Escherichia coli KTE141 acATb-supercont1.7.C35	ANWK01000001..ANWK01000035	104	ST73 Cplx	Genbank
Escherichia coli KTE142 acEnG-supercont1.17.C89	ANVA01000001..ANVA01000089	5320	-	Genbank
Escherichia coli KTE143 acEnx-supercont1.11.C65	ANVB01000001..ANVB01000065	59	ST59 Cplx	Genbank
Escherichia coli KTE144 acASM-supercont1.8.C29	ANWL01000001..ANWL01000029	2797	-	Genbank
Escherichia coli KTE145 acwpa-supercont1.92	ANYD01000001..ANYD01000092	141	-	Genbank
Escherichia coli KTE146 acASl-supercont1.9.C46	ANWM01000001..ANWM01000046	5313	-	Genbank
Escherichia coli KTE147 acATe-supercont1.3.C37	ANWN01000001..ANWN01000037	349	ST349 Cplx	Genbank
Escherichia coli KTE148 acwoC-supercont1.144	ANYE01000001..ANYE01000144	131	ST131 Cplx	Genbank
Escherichia coli KTE15 acEnL-supercont1.13.C57	ANST01000001..ANST01000057	141	-	Genbank
Escherichia coli KTE150 acwoI-supercont1.55	ANYF01000001..ANYF01000055	357	-	Genbank
Escherichia coli KTE153 acwoE-supercont1.99	ANYG01000001..ANYG01000099	73	ST73 Cplx	Genbank
Escherichia coli KTE154 acASW-supercont1.3.C39	ANWO01000001..ANWO01000039	746	-	Genbank
Escherichia coli KTE155 acHaX-supercont1.5.C32	ASVQ01000001..ASVQ01000032	10	ST10 Cplx	Genbank
Escherichia coli KTE156 acEuf-supercont1.6.C57	ANVC01000001..ANVC01000057	10	ST10 Cplx	Genbank
Escherichia coli KTE157 acwoZ-supercont1.127	ANYH01000001..ANYH01000127	1193	-	Genbank
Escherichia coli KTE158 acATh-supercont1.5.C47	ANWP01000001..ANWP01000047	69	ST69 Cplx	Genbank
Escherichia coli KTE159 acHbi-supercont1.7.C48	ASVR01000001..ASVR01000048	5260	-	Genbank
Escherichia coli KTE16 acEny-supercont1.13.C36	ANSU01000001..ANSU01000036	141	-	Genbank
Escherichia coli KTE160 acwoW-supercont1.110	ANYI01000001..ANYI01000110	73	ST73 Cplx	Genbank
Escherichia coli KTE161 acEof-supercont1.3.C56	ANVD01000001..ANVD01000056	10	ST10 Cplx	Genbank
Escherichia coli KTE162 acEnu-supercont1.10.C45	ANVE01000001..ANVE01000045	131	ST131 Cplx	Genbank
Escherichia coli KTE163 acwoM-supercont1.99	ANYJ01000001..ANYJ01000099	410	ST23 Cplx	Genbank
Escherichia coli KTE165 acASx-supercont1.3.C22	ANWQ01000001..ANWQ01000022	1236	-	Genbank
Escherichia coli KTE166 acwoN-supercont1.92	ANYK01000001..ANYK01000092	88	ST23 Cplx	Genbank
Escherichia coli KTE167 acwoV-supercont1.108.C109	ANYL01000001..ANYL01000109	73	ST73 Cplx	Genbank
Escherichia coli KTE168 acwoO-supercont1.96	ANYM01000001..ANYM01000096	141	-	Genbank
Escherichia coli KTE169 acEnv-supercont1.13.C44	ANVF01000001..ANVF01000044	141	-	Genbank
Escherichia coli KTE17 acATs-supercont1.3.C28	ANVK01000001..ANVK01000028	357	-	Genbank
Escherichia coli KTE170 acHbD-supercont1.13.C73	ASVS01000001..ASVS01000073	69	ST69 Cplx	Genbank
Escherichia coli KTE171 acEnC-supercont1.11.C50	ANVG01000001..ANVG01000050	227	ST10 Cplx	Genbank
Escherichia coli KTE172 acHaD-supercont1.12.C75	ASVT01000001..ASVT01000075	69	ST69 Cplx	Genbank
Escherichia coli KTE173 acASm-supercont1.5.C47	ANWU01000001..ANWU01000047	131	ST131 Cplx	Genbank
Escherichia coli KTE174 acwot-supercont1.111	ANYN01000001..ANYN01000111	73	ST73 Cplx	Genbank
Escherichia coli KTE175 acASt-supercont1.6.C33	ANWV01000001..ANWV01000033	131	ST131 Cplx	Genbank
Escherichia coli KTE176 acwmq-supercont1.89	ANYO01000001..ANYO01000089	421	ST95 Cplx	Genbank
Escherichia coli KTE177 acwoQ-supercont1.114	ANYP01000001..ANYP01000114	69	ST69 Cplx	Genbank
Escherichia coli KTE178 acEnl-supercont1.11.C40	ANTB01000001..ANTB01000040	131	ST131 Cplx	Genbank
Escherichia coli KTE179 acwoq-supercont1.84	ANYQ01000001..ANYQ01000084	95	ST95 Cplx	Genbank
Escherichia coli KTE18 acATi-supercont1.8.C20	ANVL01000001..ANVL01000020	357	-	Genbank
Escherichia coli KTE180 acwpb-supercont1.112	ANYR01000001..ANYR01000112	5388	-	Genbank
Escherichia coli KTE181 acEnE-supercont1.9.C70	ANTC01000001..ANTC01000070	69	ST69 Cplx	Genbank
Escherichia coli KTE182 acHbg-supercont1.20.C76	ASUG01000001..ASUG01000076	404	ST14 Cplx	Genbank
Escherichia coli KTE183 acATw-supercont1.5.C40	ANWX01000001..ANWX01000040	141	-	Genbank
Escherichia coli KTE184 acASO-supercont1.4.C27	ANWW01000001..ANWW01000027	101	ST101 Cplx	Genbank
Escherichia coli KTE185 acHaP-supercont1.11.C55	ASUH01000001..ASUH01000055	929	-	Genbank
Escherichia coli KTE186 acHbC-supercont1.20.C72	ASUI01000001..ASUI01000072	452	-	Genbank
Escherichia coli KTE187 acEoa-supercont1.8.C37	ANTD01000001..ANTD01000037	104	ST73 Cplx	Genbank
Escherichia coli KTE188 acEol-supercont1.10.C47	ANTE01000001..ANTE01000047	73	ST73 Cplx	Genbank
Escherichia coli KTE189 acEoh-supercont1.13.C48	ANTF01000001..ANTF01000048	12	ST12 Cplx	Genbank
Escherichia coli KTE19 acHaZ-supercont1.5.C33	ASTV01000001..ASTV01000033	1442	-	Genbank
Escherichia coli KTE190 acATk-supercont1.5.C46	ANWT01000001..ANWT01000046	69	ST69 Cplx	Genbank
Escherichia coli KTE191 acEnz-supercont1.12.C35	ANTG01000001..ANTG01000035	3352	-	Genbank
Escherichia coli KTE192 acATu-supercont1.5.C23	ANWR01000001..ANWR01000023	978	-	Genbank
Escherichia coli KTE193 acEnZ-supercont1.9.C64	ANTH01000001..ANTH01000064	543	-	Genbank
Escherichia coli KTE194 acASC-supercont1.9.C34	ANWS01000001..ANWS01000034	141	-	Genbank
Escherichia coli KTE195 acHbj-supercont1.16.C69	ASUJ01000001..ASUJ01000069	12	ST12 Cplx	Genbank
Escherichia coli KTE196 acATf-supercont1.4.C44	ANWY01000001..ANWY01000044	3018	-	Genbank
Escherichia coli KTE197 acASN-supercont1.4.C42	ANWZ01000001..ANWZ01000042	10	ST10 Cplx	Genbank
Escherichia coli KTE198 acHaY-supercont1.16.C108	ASUK01000001..ASUK01000108	10	ST10 Cplx	Genbank
Escherichia coli KTE199 acHaJ-supercont1.13.C65	ASUL01000001..ASUL01000065	38	ST38 Cplx	Genbank
Escherichia coli KTE2 acEnJ-supercont1.14.C64	ANSN01000001..ANSN01000064	69	ST69 Cplx	Genbank
Escherichia coli KTE20 acHbG-supercont1.24.C72	ASTW01000001..ASTW01000072	405	ST405 Cplx	Genbank
Escherichia coli KTE200 acHbd-supercont1.7.C48	ASUM01000001..ASUM01000048	69	ST69 Cplx	Genbank
Escherichia coli KTE201 acEnH-supercont1.13.C49	ANTI01000001..ANTI01000049	73	ST73 Cplx	Genbank
Escherichia coli KTE202 acASk-supercont1.8.C46	ANXA01000001..ANXA01000046	393	ST31 Cplx	Genbank
Escherichia coli KTE203 acATn-supercont1.5.C18	ANXB01000001..ANXB01000018	345	-	Genbank
Escherichia coli KTE204 acEvh-supercont1.10.C50	ANTJ01000001..ANTJ01000050	69	ST69 Cplx	Genbank
Escherichia coli KTE205 acEnI-supercont1.9.C56	ANTK01000001..ANTK01000056	404	ST14 Cplx	Genbank
Escherichia coli KTE206 acEvl-supercont1.8.C34	ANTL01000001..ANTL01000034	127	-	Genbank
Escherichia coli KTE207 acASJ-supercont1.6.C31	ANXC01000001..ANXC01000031	998	-	Genbank
Escherichia coli KTE208 acEnn-supercont1.12.C51	ANTM01000001..ANTM01000051	69	ST69 Cplx	Genbank
Escherichia coli KTE209 acASF-supercont1.3.C25	ANXD01000001..ANXD01000025	73	ST73 Cplx	Genbank
Escherichia coli KTE21 acEuW-supercont1.29.C71	ANSV01000001..ANSV01000071	405	ST405 Cplx	Genbank
Escherichia coli KTE210 acEoo-supercont1.15.C38	ANTN01000001..ANTN01000038	4088	-	Genbank
Escherichia coli KTE211 acASB-supercont1.9.C32	ANXE01000001..ANXE01000032	131	ST131 Cplx	Genbank
Escherichia coli KTE212 acEnm-supercont1.5.C38	ANTO01000001..ANTO01000038	5404	-	Genbank
Escherichia coli KTE213 acEnh-supercont1.4.C59	ANTP01000001..ANTP01000059	394	ST394 Cplx	Genbank
Escherichia coli KTE214 acEnK-supercont1.7.C45	ANTQ01000001..ANTQ01000045	73	ST73 Cplx	Genbank
Escherichia coli KTE215 acASL-supercont1.9.C46	ANXF01000001..ANXF01000046	141	-	Genbank
Escherichia coli KTE216 acEni-supercont1.16.C48	ANTR01000001..ANTR01000048	131	ST131 Cplx	Genbank
Escherichia coli KTE217 acASE-supercont1.7.C27	ANXG01000001..ANXG01000027	357	-	Genbank
Escherichia coli KTE218 acASI-supercont1.5.C38	ANXH01000001..ANXH01000038	73	ST73 Cplx	Genbank
Escherichia coli KTE219 acHbH-supercont1.6.C61	ASUN01000001..ASUN01000061	1193	-	Genbank
Escherichia coli KTE22 acATq-supercont1.6.C31	ANVR01000001..ANVR01000031	95	ST95 Cplx	Genbank
Escherichia coli KTE220 acEvC-supercont1.11.C36	ANTS01000001..ANTS01000036	73	ST73 Cplx	Genbank
Escherichia coli KTE221 acHaL-supercont1.18.C52	ASUO01000001..ASUO01000052	410	ST23 Cplx	Genbank
Escherichia coli KTE222 acHbh-supercont1.3.C19	ASUP01000001..ASUP01000019	88	ST23 Cplx	Genbank
Escherichia coli KTE223 acATt-supercont1.9.C45	ANXI01000001..ANXI01000045	73	ST73 Cplx	Genbank
Escherichia coli KTE224 acEop-supercont1.13.C50	ANTT01000001..ANTT01000050	141	-	Genbank
Escherichia coli KTE225 acHbf-supercont1.11.C62	ASUQ01000001..ASUQ01000062	69	ST69 Cplx	Genbank
Escherichia coli KTE226 acHbe-supercont1.18.C38	ASUR01000001..ASUR01000038	73	ST73 Cplx	Genbank
Escherichia coli KTE227 acASY-supercont1.4.C29	ANXJ01000001..ANXJ01000029	421	ST95 Cplx	Genbank
Escherichia coli KTE228 acEnO-supercont1.7.C52	ANTU01000001..ANTU01000052	69	ST69 Cplx	Genbank
Escherichia coli KTE229 acASS-supercont1.3.C28	ANXK01000001..ANXK01000028	95	ST95 Cplx	Genbank
Escherichia coli KTE23 acATc-supercont1.6.C14	ANVO01000001..ANVO01000014	357	-	Genbank
Escherichia coli KTE230 acEnV-supercont1.15.C52	ANTV01000001..ANTV01000052	73	ST73 Cplx	Genbank
Escherichia coli KTE231 acHbc-supercont1.11.C46	ASTT01000001..ASTT01000046	69	ST69 Cplx	Genbank
Escherichia coli KTE232 acwoP-supercont1.89	ANYS01000001..ANYS01000089	5404	-	Genbank
Escherichia coli KTE233 acEoc-supercont1.3.C72	ANTW01000001..ANTW01000072	1429	-	Genbank
Escherichia coli KTE234 acEnk-supercont1.10.C90	ANTX01000001..ANTX01000090	635	ST399 Cplx	Genbank
Escherichia coli KTE235 acEnj-supercont1.5.C62	ANTY01000001..ANTY01000062	69	ST69 Cplx	Genbank
Escherichia coli KTE236 acEuS-supercont1.17.C62	ANTZ01000001..ANTZ01000062	38	ST38 Cplx	Genbank
Escherichia coli KTE237 acEoe-supercont1.10.C69	ANUA01000001..ANUA01000069	38	ST38 Cplx	Genbank
Escherichia coli KTE24 acHbl-supercont1.14.C84	ASTX01000001..ASTX01000084	5438	-	Genbank
Escherichia coli KTE240 acHbm-supercont1.6.C57	ASUS01000001..ASUS01000057	95	ST95 Cplx	Genbank
Escherichia coli KTE25 acEva-supercont1.6.C30	ANSW01000001..ANSW01000030	357	-	Genbank
Escherichia coli KTE26 acEok-supercont1.11.C41	ANSX01000001..ANSX01000041	69	ST69 Cplx	Genbank
Escherichia coli KTE27 acHaF-supercont1.7.C46	ASTY01000001..ASTY01000046	95	ST95 Cplx	Genbank
Escherichia coli KTE28 acEnN-supercont1.12.C33	ANSY01000001..ANSY01000033	428	-	Genbank
Escherichia coli KTE29 acATr-supercont1.3.C42	ANVQ01000001..ANVQ01000042	5493	-	Genbank
Escherichia coli KTE3 acHbs-supercont1.8.C58	ASTO01000001..ASTO01000058	95	ST95 Cplx	Genbank
Escherichia coli KTE31 acHaW-supercont1.9.C29	ASTZ01000001..ASTZ01000029	5345	-	Genbank
Escherichia coli KTE33 acHXS-supercont1.24.C220	ASQM01000001..ASQM01000220	5345	-	Genbank
Escherichia coli KTE34 acHbo-supercont1.18.C94	ASUA01000001..ASUA01000094	10	ST10 Cplx	Genbank
Escherichia coli KTE35 acHbr-supercont1.18.C87	ASTR01000001..ASTR01000087	10	ST10 Cplx	Genbank
Escherichia coli KTE36 acHbB-supercont1.18.C48	ASUB01000001..ASUB01000048	2617	-	Genbank
Escherichia coli KTE37 acHaO-supercont1.25.C66	ASUC01000001..ASUC01000066	59	ST59 Cplx	Genbank
Escherichia coli KTE38 acHbA-supercont1.27.C144	ASUD01000001..ASUD01000144	59	ST59 Cplx	Genbank
Escherichia coli KTE39 acEnU-supercont1.10.C46	ANSZ01000001..ANSZ01000046	73	ST73 Cplx	Genbank
Escherichia coli KTE4 acEnM-supercont1.10.C56	ANSO01000001..ANSO01000056	95	ST95 Cplx	Genbank
Escherichia coli KTE40 acHbb-supercont1.17.C81	ASUE01000001..ASUE01000081	10	ST10 Cplx	Genbank
Escherichia coli KTE41 acHba-supercont1.9.C91	ASUF01000001..ASUF01000091	10	ST10 Cplx	Genbank
Escherichia coli KTE42 acATg-supercont1.4.C56	ANVN01000001..ANVN01000056	10	ST10 Cplx	Genbank
Escherichia coli KTE43 acATm-supercont1.5.C42	ANVP01000001..ANVP01000042	141	-	Genbank
Escherichia coli KTE44 acEod-supercont1.25.C78	ANTA01000001..ANTA01000078	10	ST10 Cplx	Genbank
Escherichia coli KTE45 acASp-supercont1.3.C31	ANVM01000001..ANVM01000031	569	-	Genbank
Escherichia coli KTE46 acASD-supercont1.4.C31	ANVS01000001..ANVS01000031	569	-	Genbank
Escherichia coli KTE47 acEun-supercont1.11.C26	ANUB01000001..ANUB01000026	567	-	Genbank
Escherichia coli KTE48 acASU-supercont1.6.C34	ANVT01000001..ANVT01000034	2723	-	Genbank
Escherichia coli KTE49 acEvj-supercont1.6.C61	ANUC01000001..ANUC01000061	131	ST131 Cplx	Genbank
Escherichia coli KTE5 acEom-supercont1.10.C65	ANSP01000001..ANSP01000065	95	ST95 Cplx	Genbank
Escherichia coli KTE50 acASQ-supercont1.4.C56	ANVU01000001..ANVU01000056	393	ST31 Cplx	Genbank
Escherichia coli KTE51 acEnB-supercont1.29.C108	ANUD01000001..ANUD01000108	3877	-	Genbank
Escherichia coli KTE52 acHaH-supercont1.9.C49	ASUT01000001..ASUT01000049	3727	-	Genbank
Escherichia coli KTE53 acEns-supercont1.15.C39	ANUE01000001..ANUE01000039	73	ST73 Cplx	Genbank
Escherichia coli KTE54 acASs-supercont1.2.C36	ANVV01000001..ANVV01000036	69	ST69 Cplx	Genbank
Escherichia coli KTE55 acEnS-supercont1.11.C33	ANUF01000001..ANUF01000033	95	ST95 Cplx	Genbank
Escherichia coli KTE56 acEnA-supercont1.4.C40	ANUG01000001..ANUG01000040	10	ST10 Cplx	Genbank
Escherichia coli KTE57 acEob-supercont1.12.C38	ANUH01000001..ANUH01000038	550	ST14 Cplx	Genbank
Escherichia coli KTE58 acEoi-supercont1.7.C44	ANUI01000001..ANUI01000044	95	ST95 Cplx	Genbank
Escherichia coli KTE59 acASG-supercont1.7.C33	ANVW01000001..ANVW01000033	95	ST95 Cplx	Genbank
Escherichia coli KTE6 acASz-supercont1.4.C27	ANVH01000001..ANVH01000027	131	ST131 Cplx	Genbank
Escherichia coli KTE60 acEuT-supercont1.20.C38	ANUJ01000001..ANUJ01000038	1618	-	Genbank
Escherichia coli KTE61 acHaS-supercont1.10.C76	ASUU01000001..ASUU01000076	10	ST10 Cplx	Genbank
Escherichia coli KTE62 acEnt-supercont1.11.C36	ANUK01000001..ANUK01000036	95	ST95 Cplx	Genbank
Escherichia coli KTE63 acASu-supercont1.8.C24	ANVX01000001..ANVX01000024	73	ST73 Cplx	Genbank
Escherichia coli KTE64 acHbq-supercont1.15.C103	ASUV01000001..ASUV01000103	399	ST399 Cplx	Genbank
Escherichia coli KTE65 acASq-supercont1.4.C31	ANVY01000001..ANVY01000031	95	ST95 Cplx	Genbank
Escherichia coli KTE66 acEnR-supercont1.14.C51	ANUL01000001..ANUL01000051	5321	-	Genbank
Escherichia coli KTE67 acEvz-supercont1.5.C32	ANUM01000001..ANUM01000032	73	ST73 Cplx	Genbank
Escherichia coli KTE68 acHbp-supercont1.19.C86	ASUW01000001..ASUW01000086	69	ST69 Cplx	Genbank
Escherichia coli KTE69 acHaK-supercont1.17.C131	ASUX01000001..ASUX01000131	59	ST59 Cplx	Genbank
Escherichia coli KTE7 acHaM-supercont1.10.C43	ASTP01000001..ASTP01000043	95	ST95 Cplx	Genbank
Escherichia coli KTE70 acHbw-supercont1.23.C116	ASUY01000001..ASUY01000116	59	ST59 Cplx	Genbank
Escherichia coli KTE71 acHaR-supercont1.14.C121	ASUZ01000001..ASUZ01000121	330	ST10 Cplx	Genbank
Escherichia coli KTE72 acEog-supercont1.15.C36	ANUN01000001..ANUN01000036	141	-	Genbank
Escherichia coli KTE73 acHaQ-supercont1.13.C88	ASVA01000001..ASVA01000088	216	-	Genbank
Escherichia coli KTE74 acHaI-supercont1.14.C102	ASVB01000001..ASVB01000102	59	ST59 Cplx	Genbank
Escherichia coli KTE75 acEuD-supercont1.37.C83	ANUO01000001..ANUO01000083	738	-	Genbank
Escherichia coli KTE76 acEnX-supercont1.6.C57	ANUP01000001..ANUP01000057	38	ST38 Cplx	Genbank
Escherichia coli KTE77 acEnw-supercont1.8.C38	ANUQ01000001..ANUQ01000038	10	ST10 Cplx	Genbank
Escherichia coli KTE78 acASA-supercont1.8.C34	ANVZ01000001..ANVZ01000034	362	-	Genbank
Escherichia coli KTE79 acASn-supercont1.2.C26	ANWA01000001..ANWA01000026	362	-	Genbank
Escherichia coli KTE8 acASZ-supercont1.9.C40	ANVI01000001..ANVI01000040	127	-	Genbank
Escherichia coli KTE80 acEnF-supercont1.28.C60	ANUR01000001..ANUR01000060	69	ST69 Cplx	Genbank
Escherichia coli KTE81 acEoj-supercont1.8.C42	ANUS01000001..ANUS01000042	1695	-	Genbank
Escherichia coli KTE82 acwoB-supercont1.169	ANYT01000001..ANYT01000169	69	ST69 Cplx	Genbank
Escherichia coli KTE83 acEnD-supercont1.16.C46	ANUT01000001..ANUT01000046	69	ST69 Cplx	Genbank
Escherichia coli KTE84 acATv-supercont1.3.C34	ANWB01000001..ANWB01000034	5394	-	Genbank
Escherichia coli KTE85 acwoS-supercont1.173.C174	ANYU01000001..ANYU01000174	404	ST14 Cplx	Genbank
Escherichia coli KTE86 acEnW-supercont1.15.C33	ANUU01000001..ANUU01000033	141	-	Genbank
Escherichia coli KTE87 acEvx-supercont1.11.C50	ANUV01000001..ANUV01000050	73	ST73 Cplx	Genbank
Escherichia coli KTE88 acwoY-supercont1.104	ANYV01000001..ANYV01000104	141	-	Genbank
Escherichia coli KTE89 acHbF-supercont1.11.C54	ASVC01000001..ASVC01000054	141	-	Genbank
Escherichia coli KTE9 acASr-supercont1.4.C40	ANVJ01000001..ANVJ01000040	1670	-	Genbank
Escherichia coli KTE90 acwoK-supercont1.91	ANYW01000001..ANYW01000091	101	ST101 Cplx	Genbank
Escherichia coli KTE91 acASo-supercont1.5.C20	ANWC01000001..ANWC01000020	101	ST101 Cplx	Genbank
Escherichia coli KTE93 acEnQ-supercont1.10.C36	ANUW01000001..ANUW01000036	141	-	Genbank
Escherichia coli KTE94 acwos-supercont1.122	ANYX01000001..ANYX01000122	929	-	Genbank
Escherichia coli KTE95 acwoX-supercont1.108	ANYY01000001..ANYY01000108	394	ST394 Cplx	Genbank
Escherichia coli KTE96 acHaU-supercont1.4.C33	ASVD01000001..ASVD01000033	5463	-	Genbank
Escherichia coli KTE97 acwov-supercont1.84	ANYZ01000001..ANYZ01000084	104	ST73 Cplx	Genbank
Escherichia coli KTE98 acHbx-supercont1.5.C27	ASVE01000001..ASVE01000027	59	ST59 Cplx	Genbank
Escherichia coli KTE99 acwoJ-supercont1.122	ANZA01000001..ANZA01000122	73	ST73 Cplx	Genbank
Escherichia coli LAU-EC2	AYLY00000000.1	131	ST131 Cplx	Genbank
Escherichia coli LAU-EC3	AYOO00000000.1	131	ST131 Cplx	Genbank
Escherichia coli LAU-EC4	AYOP00000000.1	405	ST405 Cplx	Genbank
Escherichia coli LAU-EC5	AYOG00000000.1	405	ST405 Cplx	Genbank
Escherichia coli LAU-EC6 contig_99	AYNF01000001..AYNF01000106	73	ST73 Cplx	Genbank
Escherichia coli LAU-EC7 contig_9	AYNG01000001..AYNG01000077	131	ST131 Cplx	Genbank
Escherichia coli LAU-EC8 contig_99	AYNH01000001..AYNH01000109	648	ST648 Cplx	Genbank
Escherichia coli LAU-EC9 contig_99	AYNI01000001..AYNI01000114	648	ST648 Cplx	Genbank
Escherichia coli LCT-EC106	AJRI00000000.1	73	ST73 Cplx	Genbank
Escherichia coli LCT-EC52	ANHT00000000.1	73	ST73 Cplx	Genbank
Escherichia coli LCT-EC59	ANHV00000000.1	73	ST73 Cplx	Genbank
Escherichia coli LF82	CU651637	135	-	Genbank
Escherichia coli LR09	JDVF00000000.1	648	ST648 Cplx	Genbank
Escherichia coli LT-68 gecLT68.assembly.9	ADUP01000001..ADUP01000063	NT	-	Genbank
Escherichia coli LY180	CP006584	1079	-	Genbank
Escherichia coli M605 genomic scaffold supercont1.83	GL883892..GL883974	1876	-	Genbank
Escherichia coli M718 genomic scaffold supercont1.67	GL884101..GL884167	57	ST350 Cplx	Genbank
Escherichia coli M863 cont2.152	AEHZ01000001..AEHZ01000152	2715	-	Genbank
Escherichia coli M919 cont2.118	AEVZ01000001..AEVZ01000118	10	ST10 Cplx	Genbank
Escherichia coli MA6 MA6.contig.471_2	AMUF01000001..AMUF01000453	11	ST11 Cplx	Genbank
Escherichia coli MC19	ATNZ00000000.1	69	ST69 Cplx	Genbank
Escherichia coli MC21	ATNY00000000.1	69	ST69 Cplx	Genbank
Escherichia coli MC23	ATNX00000000.1	69	ST69 Cplx	Genbank
Escherichia coli MC6002	ATNW00000000.1	69	ST69 Cplx	Genbank
Escherichia coli MC6003	ATNV00000000.1	70	-	Genbank
Escherichia coli MGH 57 aedZS-supercont1.14.C56	JMVP01000001..JMVP01000056	156	ST156 Cplx	Genbank
Escherichia coli MGH 58 aeeaK-supercont1.7.C63	JMVQ01000001..JMVQ01000063	69	ST69 Cplx	Genbank
Escherichia coli MP020940.1 gecMP020940.contig.55	AQEZ01000001..AQEZ01000056	156	ST156 Cplx	Genbank
Escherichia coli MP020980.1 gecMP0209801.contig.163	APZN01000001..APZN01000162	1196	-	Genbank
Escherichia coli MP020980.2 gecMP0209802.contig.50	AQEY01000001..AQEY01000051	1196	-	Genbank
Escherichia coli MP021017.1 gecMP0210171.contig.35	AQEX01000001..AQEX01000036	2795	-	Genbank
Escherichia coli MP021017.10 gecMP02101710.contig.172	AQCW01000001..AQCW01000172	2795	-	Genbank
Escherichia coli MP021017.11 gecMP02101711.contig.155	AQCV01000001..AQCV01000156	NT	-	Genbank
Escherichia coli MP021017.12 gecMP02101712.contig.478	AQCU01000001..AQCU01000470	2795	-	Genbank
Escherichia coli MP021017.2 gecMP0210172.contig.154	AQCT01000001..AQCT01000155	NT	-	Genbank
Escherichia coli MP021017.3 gecMP0210173.contig.138	AQCS01000001..AQCS01000139	2795	-	Genbank
Escherichia coli MP021017.4 gecMP0210174.contig.155	AQCR01000001..AQCR01000156	2795	-	Genbank
Escherichia coli MP021017.5 gecMP0210175.contig.136	AQCQ01000001..AQCQ01000137	NT	-	Genbank
Escherichia coli MP021017.6 gecMP0210176.contig.147	AQCP01000001..AQCP01000148	NT	-	Genbank
Escherichia coli MP021017.9 gecMP0210179.contig.139	AQCO01000001..AQCO01000140	NT	-	Genbank
Escherichia coli MP021552.11 gecMP02155211.contig.211	AQCN01000001..AQCN01000212	2851	-	Genbank
Escherichia coli MP021552.12 gecMP02155212.contig.233	AQCM01000001..AQCM01000233	NT	-	Genbank
Escherichia coli MP021552.7 gecMP0215527.contig.259	AQCL01000001..AQCL01000259	NT	-	Genbank
Escherichia coli MP021552.8 gecMP0215528.contig.71	AQEW01000001..AQEW01000072	2851	-	Genbank
Escherichia coli MP021561.2 gecMP0215612.contig.36	AQEV01000001..AQEV01000037	542	-	Genbank
Escherichia coli MP021561.3 gecMP0215613.contig.213	APXP01000001..APXP01000213	58	ST155 Cplx	Genbank
Escherichia coli MP021566.1 gecMP0215661.contig.32	AQEU01000001..AQEU01000033	2353	-	Genbank
Escherichia coli MP1 contig00085	JEMI01000001..JEMI01000077	491	-	Genbank
Escherichia coli MS 107-1 E_coliMS107-1-1.0.1_Cont71.1	ADWV01000001..ADWV01000072	101	ST101 Cplx	Genbank
Escherichia coli MS 110-3 E_coli110-3-1.0_Cont1239.2	ADTW01000001..ADTW01000411	95	ST95 Cplx	Genbank
Escherichia coli MS 115-1 E_coli115-1-1.0_Cont1168.5	ADTL01000001..ADTL01000423	399	ST399 Cplx	Genbank
Escherichia coli MS 116-1 E_coli116-1-1.0_Cont1076.5	ADTZ01000001..ADTZ01000484	167	ST10 Cplx	Genbank
Escherichia coli MS 117-3 E_coli117-3-1.0_Cont2331.5	ADTS01000001..ADTS01000467	156	ST156 Cplx	Genbank
Escherichia coli MS 119-7 E_coliMS119-7-1.0.1_Cont129.1	ADWU01000001..ADWU01000130	155	ST155 Cplx	Genbank
Escherichia coli MS 124-1 E_coliMS124-1-1.0.1_Cont175.1	ADWT01000001..ADWT01000176	88	ST23 Cplx	Genbank
Escherichia coli MS 145-7 E_coliMS145-7-1.0.1_Cont143.1	ADWS01000001..ADWS01000143	448	ST448 Cplx	Genbank
Escherichia coli MS 146-1 E_coli146-1-1.0_Cont967.3	ADTN01000001..ADTN01000355	34	ST10 Cplx	Genbank
Escherichia coli MS 153-1 E_coli153-1-1.0_Cont1155.10	ADTX01000001..ADTX01000507	73	ST73 Cplx	Genbank
Escherichia coli MS 16-3 E_coli16-3-1.0_Cont668.4	ADUA01000001..ADUA01000451	978	-	Genbank
Escherichia coli MS 175-1 E_coli175-1-1.0_Cont950.2	ADUB01000001..ADUB01000413	167	ST10 Cplx	Genbank
Escherichia coli MS 182-1 E_coli182-1-1.0_Cont1005.11	ADTM01000001..ADTM01000456	453	ST86 Cplx	Genbank
Escherichia coli MS 185-1 E_coli185-1-1.0_Cont1389.2	ADUE01000001..ADUE01000378	73	ST73 Cplx	Genbank
Escherichia coli MS 187-1 E_coli187-1-1.0_Cont582.3	ADTQ01000001..ADTQ01000310	93	ST168 Cplx	Genbank
Escherichia coli MS 196-1 E_coli196-1-1.0_Cont2538.1	ADUD01000001..ADUD01000785	10	ST10 Cplx	Genbank
Escherichia coli MS 198-1 E_coli198-1-1.0_Cont936.1	ADTJ01000001..ADTJ01000564	69	ST69 Cplx	Genbank
Escherichia coli MS 200-1 E_coli1200-1-1.0_Cont866.1	ADUC01000001..ADUC01000445	127	-	Genbank
Escherichia coli MS 21-1 E_coli21-1-1.0_Cont1081.5	ADTR01000001..ADTR01000540	59	ST59 Cplx	Genbank
Escherichia coli MS 45-1 strain MS45-1 E_coli-1.0_Cont1365.2	ADTO01000001..ADTO01000396	73	ST73 Cplx	Genbank
Escherichia coli MS 57-2 E_coli57-2-1.0_Cont494.6	ADUG01000001..ADUG01000408	NT	-	Genbank
Escherichia coli MS 60-1 E_coli60-1-1.0_Cont1764.14	ADUF01000001..ADUF01000464	127	-	Genbank
Escherichia coli MS 69-1 E_coli69-1-1.0_Cont1002.10	ADTP01000001..ADTP01000425	NT	-	Genbank
Escherichia coli MS 78-1 E_coli78-1-1.0_Cont1151.3	ADTY01000001..ADTY01000410	86	ST86 Cplx	Genbank
Escherichia coli MS 79-10 E_coliMS79-10-1.0.1_Cont156.1	ADWR01000001..ADWR01000157	101	ST101 Cplx	Genbank
Escherichia coli MS 84-1 E_coli84-1-1.0_Cont1664.2	ADTK01000001..ADTK01000432	88	ST23 Cplx	Genbank
Escherichia coli MS 85-1 E_coliMS85-1-1.0.1_Cont235.1	ADWQ01000001..ADWQ01000234	88	ST23 Cplx	Genbank
Escherichia coli MS499	JDRV00000000.1	453	ST86 Cplx	Genbank
Escherichia coli N1 N1.contig.343_1	AMUQ01000001..AMUQ01000334	515	-	Genbank
Escherichia coli NA114	CP002797	131	ST131 Cplx	Genbank
Escherichia coli NC101 contig27	AEFA01000001..AEFA01000027	998	-	Genbank
Escherichia coli NCCP15647	AJMB00000000.1	4017	-	Genbank
Escherichia coli NCCP15657	AJLU00000000.1	517	-	Genbank
Escherichia coli NCCP15658	AJMD00000000.1	11	ST11 Cplx	Genbank
Escherichia coli NE037 NE037.contig.678_2	AMTY01000001..AMTY01000604	11	ST11 Cplx	Genbank
Escherichia coli NE098 NE098.contig.643_1	AMVH01000001..AMVH01000471	11	ST11 Cplx	Genbank
Escherichia coli NE1487 NE1487.contig.539_1	AMTX01000001..AMTX01000481	11	ST11 Cplx	Genbank
Escherichia coli Nissle 1917	CAPM00000000.1	73	ST73 Cplx	Genbank
Escherichia coli O08 contig160	AOGM01000001..AOGM01000160	453	ST86 Cplx	Genbank
Escherichia coli O10:K5(L):H4 str. ATCC 23506 WGS project CAPK00000000 data, contig 112	CAPK01000001..CAPK01000224	10	ST10 Cplx	Genbank
Escherichia coli O103:H2 str. 12009	AP010958..AP010959	17	ST20 Cplx	Genbank
Escherichia coli O103:H2 str. CVM9450 ECO9450_99	AJVR01000001..AJVR01000322	17	ST20 Cplx	Genbank
Escherichia coli O103:H25 str. CVM9340 ECO9340_99	AJVQ01000001..AJVQ01000301	343	-	Genbank
Escherichia coli O103:H25 str. NIPH-11060424	AGSG00000000.1	343	-	Genbank
Escherichia coli O104:H4 str. 01-09591 HUSEC41_contig97	AFPS01000001..AFPS01000287	678	-	Genbank
Escherichia coli O104:H4 str. 04-8351	AFRL00000000.1	678	-	Genbank
Escherichia coli O104:H4 str. 09-7901	AFRK00000000.1	678	-	Genbank
Escherichia coli O104:H4 str. 11-02030 supercont1.9	AMVR01000001..AMVR01000043	678	-	Genbank
Escherichia coli O104:H4 str. 11-02033-1 supercont1.9	AMVS01000001..AMVS01000052	678	-	Genbank
Escherichia coli O104:H4 str. 11-02092 supercont1.9	AMVT01000001..AMVT01000035	678	-	Genbank
Escherichia coli O104:H4 str. 11-02093 supercont1.9	AMVU01000001..AMVU01000038	678	-	Genbank
Escherichia coli O104:H4 str. 11-02281 supercont1.9	AMVV01000001..AMVV01000046	678	-	Genbank
Escherichia coli O104:H4 str. 11-02318 cont1.43	AMVW01000001..AMVW01000043	678	-	Genbank
Escherichia coli O104:H4 str. 11-02913 supercont1.9	AMVX01000001..AMVX01000037	678	-	Genbank
Escherichia coli O104:H4 str. 11-03439 supercont1.9	AMVY01000001..AMVY01000042	678	-	Genbank
Escherichia coli O104:H4 str. 11-03943 supercont1.9	AMWA01000001..AMWA01000042	678	-	Genbank
Escherichia coli O104:H4 str. 11-04080 supercont1.9	AMVZ01000001..AMVZ01000043	678	-	Genbank
Escherichia coli O104:H4 str. 11-3677	AFRM00000000.1	678	-	Genbank
Escherichia coli O104:H4 str. 11-4404 cont1.58	AFUX01000001..AFUX01000058	678	-	Genbank
Escherichia coli O104:H4 str. 11-4522 cont1.57	AFUY01000001..AFUY01000057	678	-	Genbank
Escherichia coli O104:H4 str. 11-4623 cont1.52	AFUZ01000001..AFUZ01000052	678	-	Genbank
Escherichia coli O104:H4 str. 11-4632 C1 cont1.58	AFVA01000001..AFVA01000058	678	-	Genbank
Escherichia coli O104:H4 str. 11-4632 C2 cont1.54	AFVB01000001..AFVB01000054	678	-	Genbank
Escherichia coli O104:H4 str. 11-4632 C3 cont1.56	AFVC01000001..AFVC01000056	678	-	Genbank
Escherichia coli O104:H4 str. 11-4632 C4 cont1.54	AFVD01000001..AFVD01000054	678	-	Genbank
Escherichia coli O104:H4 str. 11-4632 C5 cont1.47	AFVE01000001..AFVE01000047	678	-	Genbank
Escherichia coli O104:H4 str. 2009EL-2050	CP003297..CP003300	678	-	Genbank
Escherichia coli O104:H4 str. 2009EL-2071	CP003301..CP003303	678	-	Genbank
Escherichia coli O104:H4 str. 2011C-3493	CP003289..CP003292	678	-	Genbank
Escherichia coli O104:H4 str. C227-11	AFRH00000000.1	678	-	Genbank
Escherichia coli O104:H4 str. C227-11 C227-11_0037	AFST01000001..AFST01000037	678	-	Genbank
Escherichia coli O104:H4 str. C227-11 cont1.26	AFRH01000001..AFRH01000026	678	-	Genbank
Escherichia coli O104:H4 str. C236-11	AFRI00000000.1	678	-	Genbank
Escherichia coli O104:H4 str. E112/10 contig00217	AHAV01000001..AHAV01000218	678	-	Genbank
Escherichia coli O104:H4 str. E92/11 contig00165	AHAU01000001..AHAU01000167	678	-	Genbank
Escherichia coli O104:H4 str. Ec11-4984 cont1.39	AHOU01000001..AHOU01000039	678	-	Genbank
Escherichia coli O104:H4 str. Ec11-4986 cont1.39	AHOW01000001..AHOW01000039	678	-	Genbank
Escherichia coli O104:H4 str. Ec11-4987 cont1.36	AHOX01000001..AHOX01000036	678	-	Genbank
Escherichia coli O104:H4 str. Ec11-4988 cont1.43	AHOY01000001..AHOY01000043	678	-	Genbank
Escherichia coli O104:H4 str. Ec11-5603 cont1.35	AHOZ01000001..AHOZ01000035	678	-	Genbank
Escherichia coli O104:H4 str. Ec11-5604 cont1.44	AHOV01000001..AHOV01000044	678	-	Genbank
Escherichia coli O104:H4 str. Ec11-6006 cont1.42	AHPA01000001..AHPA01000042	678	-	Genbank
Escherichia coli O104:H4 str. Ec11-9450 strain Ec 11-9450 cont1.68	AGWF01000001..AGWF01000068	678	-	Genbank
Escherichia coli O104:H4 str. Ec11-9941 strain Ec 11-9941 cont6.41	AGWH01000001..AGWH01000041	678	-	Genbank
Escherichia coli O104:H4 str. Ec11-9990 cont1.50	AGWG01000001..AGWG01000050	678	-	Genbank
Escherichia coli O104:H4 str. Ec12-0465 cont1.36	AIPQ01000001..AIPQ01000036	678	-	Genbank
Escherichia coli O104:H4 str. Ec12-0466 cont1.50	AIPR01000001..AIPR01000050	678	-	Genbank
Escherichia coli O104:H4 str. GOS1	AFWO00000000.1	678	-	Genbank
Escherichia coli O104:H4 str. GOS2	AFWP00000000.1	678	-	Genbank
Escherichia coli O104:H4 str. H112180280	GL988050.1	678	-	Genbank
Escherichia coli O104:H4 str. H112180282	AFSO00000000.1	678	-	Genbank
Escherichia coli O104:H4 str. H112180283	AFWC00000000.1	678	-	Genbank
Escherichia coli O104:H4 str. H112180540	AFWB00000000.1	NT	-	Genbank
Escherichia coli O104:H4 str. H112180541	AFRO00000000.1	678	-	Genbank
Escherichia coli O104:H4 str. LB226692	AFOB02000000.1	NT	-	Genbank
Escherichia coli O104:H4 str. ON2010	AHZE00000000.1	678	-	Genbank
Escherichia coli O104:H4 str. ON2011	AHZF00000000.1	678	-	Genbank
Escherichia coli O104:H4 str. TY-2482	GL989507.1	678	-	Genbank
Escherichia coli O111:H- str. 11128	AP010960..AP010965	16	ST29 Cplx	Genbank
Escherichia coli O111:H11 str. CFSAN001630 CFSAN001630_265	AMXP01000001..AMXP01000435	21	ST29 Cplx	Genbank
Escherichia coli O111:H11 str. CVM9455 ECO9455_99	AKAX01000001..AKAX01000845	21	ST29 Cplx	Genbank
Escherichia coli O111:H11 str. CVM9534 ECO9534_99	AJVS01000001..AJVS01000559	21	ST29 Cplx	Genbank
Escherichia coli O111:H11 str. CVM9545 ECO9545_99	AJVT01000001..AJVT01000790	21	ST29 Cplx	Genbank
Escherichia coli O111:H11 str. CVM9553 ECO9553_99	AKAY01000001..AKAY01000633	21	ST29 Cplx	Genbank
Escherichia coli O111:H8 str. CFSAN001632 CFSAN001632_69	AMXQ01000001..AMXQ01000238	16	ST29 Cplx	Genbank
Escherichia coli O111:H8 str. CVM9570 ECO9570_99	AJVU01000001..AJVU01000633	16	ST29 Cplx	Genbank
Escherichia coli O111:H8 str. CVM9574 ECO9574_99	AJVV01000001..AJVV01000469	16	ST29 Cplx	Genbank
Escherichia coli O111:H8 str. CVM9602 ECO9602_99	AKAV01000001..AKAV01000268	16	ST29 Cplx	Genbank
Escherichia coli O111:H8 str. CVM9634 ECO9634_99	AKAW01000001..AKAW01000454	NT	-	Genbank
Escherichia coli O111:NM str. 2010C-3977	JHFG00000000.1	16	ST29 Cplx	Genbank
Escherichia coli O113:H21 str. CL-3	AGTH00000000.1	223	ST155 Cplx	Genbank
Escherichia coli O121:H19 str. MT#2	AGTJ00000000.1	655	-	Genbank
Escherichia coli O127:H27 str. C43/90 NODE_230	AHAW01000001..AHAW01000120	10	ST10 Cplx	Genbank
Escherichia coli O127:H6 str. E2348/69 substr. CVDNalr	ASZR00000000.1	15	-	Genbank
Escherichia coli O127:H6 str. E2348/69 substr. UMD753	ASZS00000000.1	15	-	Genbank
Escherichia coli O145:H28 str. 4865/96	JHEY00000000.1	32	ST32 Cplx	Genbank
Escherichia coli O145:H28 str. 4865/96 EC1677_c249	JHEY01000001..JHEY01000249	32	ST32 Cplx	Genbank
Escherichia coli O157 str. NCCP15738	ASHB00000000.1	3744	-	Genbank
Escherichia coli O157 str. NCCP15739	ASHA00000000.1	11	ST11 Cplx	Genbank
Escherichia coli O157:H- str. 493-89 ECO9389_99	AETY01000001..AETY01000204	11	ST11 Cplx	Genbank
Escherichia coli O157:H- str. H 2687 ECO2687_99	AETZ01000001..AETZ01000209	587	ST11 Cplx	Genbank
Escherichia coli O157:H43 str. T22 contig64	AHZD02000001..AHZD02000064	155	ST155 Cplx	Genbank
Escherichia coli O157:H7 EDL933	AE005174..AF074613	NT	-	Genbank
Escherichia coli O157:H7 str. 1044 ECA.Contig259_2	AERP01000001..AERP01000070	11	ST11 Cplx	Genbank
Escherichia coli O157:H7 str. 1125 ECF.	AERR00000000.1	11	ST11 Cplx	Genbank
Escherichia coli O157:H7 str. EC1212 ECD.Contig109_1	AERQ01000001..AERQ01000032	11	ST11 Cplx	Genbank
Escherichia coli O157:H7 str. EC4009	ADMX00000000.1	11	ST11 Cplx	Genbank
Escherichia coli O157:H7 str. EC4024	DS571061.1	11	ST11 Cplx	Genbank
Escherichia coli O157:H7 str. EC4042 gcontig_1113125281290	ABHM02000001..ABHM02000004	11	ST11 Cplx	Genbank
Escherichia coli O157:H7 str. EC4045 gcontig_1113126024315	ABHL02000001..ABHL02000008	11	ST11 Cplx	Genbank
Escherichia coli O157:H7 str. EC4076 gcontig_1105762733835	ABHQ01000001..ABHQ01000135	11	ST11 Cplx	Genbank
Escherichia coli O157:H7 str. EC4084	ADUY00000000.1	11	ST11 Cplx	Genbank
Escherichia coli O157:H7 str. EC4113 gcontig_1105762723167	ABHP01000001..ABHP01000231	11	ST11 Cplx	Genbank
Escherichia coli O157:H7 str. EC4115	CP001163..CP001165	11	ST11 Cplx	Genbank
Escherichia coli O157:H7 str. EC4127	ADUZ00000000.1	11	ST11 Cplx	Genbank
Escherichia coli O157:H7 str. EC4191	ADVA00000000.1	11	ST11 Cplx	Genbank
Escherichia coli O157:H7 str. EC4192	ADUX00000000.1	NT	-	Genbank
Escherichia coli O157:H7 str. EC4196 gcontig_1105416507173	ABHO01000001..ABHO01000186	11	ST11 Cplx	Genbank
Escherichia coli O157:H7 str. EC4205	ADVB00000000.1	11	ST11 Cplx	Genbank
Escherichia coli O157:H7 str. EC4206 gcontig_1113126024103	ABHK02000001..ABHK02000007	11	ST11 Cplx	Genbank
Escherichia coli O157:H7 str. EC4401 gcontig_1107724394223	ABHR01000001..ABHR01000186	11	ST11 Cplx	Genbank
Escherichia coli O157:H7 str. EC4486 gcontig_1106603633488	ABHS01000001..ABHS01000165	11	ST11 Cplx	Genbank
Escherichia coli O157:H7 str. EC4501 gcontig_1106627446471	ABHT01000001..ABHT01000250	11	ST11 Cplx	Genbank
Escherichia coli O157:H7 str. EC508 gcontig_1108341391651	ABHW01000001..ABHW01000272	11	ST11 Cplx	Genbank
Escherichia coli O157:H7 str. EC536	ADVC00000000.1	11	ST11 Cplx	Genbank
Escherichia coli O157:H7 str. EC869 gcontig_1106613680304	ABHU01000001..ABHU01000147	11	ST11 Cplx	Genbank
Escherichia coli O157:H7 str. F8092B	AVCD00000000.1	11	ST11 Cplx	Genbank
Escherichia coli O157:H7 str. FRIK2000	ACXO00000000.1	11	ST11 Cplx	Genbank
Escherichia coli O157:H7 str. FRIK966	ACXN00000000.1	11	ST11 Cplx	Genbank
Escherichia coli O157:H7 str. G5101 ECO5101_99	AETX01000001..AETX01000217	11	ST11 Cplx	Genbank
Escherichia coli O157:H7 str. H093800014	CAOT00000000.1	11	ST11 Cplx	Genbank
Escherichia coli O157:H7 str. LSU-61 ECOSU61_99	AEUC01000001..AEUC01000189	11	ST11 Cplx	Genbank
Escherichia coli O157:H7 str. Sakai	AB011548..BA000007	11	ST11 Cplx	Genbank
Escherichia coli O157:H7 str. TW14359	CP001368..CP001369	11	ST11 Cplx	Genbank
Escherichia coli O157:H7 str. TW14588 gcontig_1117790713612	ABKY02000001..ABKY02000010	11	ST11 Cplx	Genbank
Escherichia coli O174:H21 strain 220/00	APWX00000000.1	677	-	Genbank
Escherichia coli O25b:H4-ST131 str. EC958, WGS project CAFL00000000 data, contig 00141	CAFL01000001..CAFL01000240	131	ST131 Cplx	Genbank
Escherichia coli O26:H11 str. 11368	AP010953..AP010957	21	ST29 Cplx	Genbank
Escherichia coli O26:H11 str. CFSAN001629 CFSAN001629_161	AMXO01000001..AMXO01000259	21	ST29 Cplx	Genbank
Escherichia coli O26:H11 str. CVM10021 ECO10021_99	AKAZ01000001..AKAZ01000477	21	ST29 Cplx	Genbank
Escherichia coli O26:H11 str. CVM10026 ECO10026_99	AJVX01000001..AJVX01000485	21	ST29 Cplx	Genbank
Escherichia coli O26:H11 str. CVM10030 ECO10030_99	AKBA01000001..AKBA01000473	21	ST29 Cplx	Genbank
Escherichia coli O26:H11 str. CVM10224 ECO10224_99	AKBB01000001..AKBB01000354	21	ST29 Cplx	Genbank
Escherichia coli O26:H11 str. CVM9942 ECO9942_99	AJVW01000001..AJVW01000568	21	ST29 Cplx	Genbank
Escherichia coli O26:H11 str. CVM9952 ECO9952_99	AKBC01000001..AKBC01000442	21	ST29 Cplx	Genbank
Escherichia coli O32:H37 str. P4 contig72	AJQW01000001..AJQW01000072	10	ST10 Cplx	Genbank
Escherichia coli O45:H2 str. 03-EN-705 EC1674	AGTK00000000.1	17	ST20 Cplx	Genbank
Escherichia coli O5:K4(L):H4 str. ATCC 23502 WGS project CAPL00000000 data, contig 112	CAPL01000001..CAPL01000160	5675	-	Genbank
Escherichia coli O55:H7 str. 3256-97 strain 3256-97 TW 07815 ECO7815_99	AEUA01000001..AEUA01000188	335	ST11 Cplx	Genbank
Escherichia coli O55:H7 str. CB9615	CP001846..CP001847	335	ST11 Cplx	Genbank
Escherichia coli O55:H7 str. RM12579	CP003109..CP003114	335	ST11 Cplx	Genbank
Escherichia coli O55:H7 str. USDA 5905 ECO5905_99	AEUB01000001..AEUB01000154	335	ST11 Cplx	Genbank
Escherichia coli O6:H16:CFA/II str. B2C contig000313	AUZS01000001..AUZS01000313	4	ST10 Cplx	Genbank
Escherichia coli O7:K1 str. CE10	CP003034..CP003038	62	-	Genbank
Escherichia coli O83:H1 str. NRG 857C	CP001855..CP001856	135	-	Genbank
Escherichia coli O91 Scaffold1_1	AOUP00000000.1	33	-	Genbank
Escherichia coli O91 Scaffold1_1	AOUQ00000000.1	33	-	Genbank
Escherichia coli O91:H21 str. B2F1 EC1624	AGTI00000000.1	442	-	Genbank
Escherichia coli OK1114	AICG00000000.1	16	ST29 Cplx	Genbank
Escherichia coli OK1180 OK1180.assembly.9	ADUQ01000001..ADUQ01000086	16	ST29 Cplx	Genbank
Escherichia coli OK1357 OK1357.assembly.9	ADUR01000001..ADUR01000180	2244	-	Genbank
Escherichia coli ONT:H33 str. C48/93 NODE_183	AHAX01000001..AHAX01000102	34	ST10 Cplx	Genbank
Escherichia coli ONT:H33 str. C48/93 NODE_36B	AHAX00000000.1	34	ST10 Cplx	Genbank
Escherichia coli OP50	ADBT00000000.1	NT	-	Genbank
Escherichia coli P0298942.1 gecP02989421.contig.67	AQET01000001..AQET01000068	96	-	Genbank
Escherichia coli P0298942.10 gecP029894210.contig.191	APXQ01000001..APXQ01000174	96	-	Genbank
Escherichia coli P0298942.11 gecP029894211.contig.205	APXR01000001..APXR01000205	96	-	Genbank
Escherichia coli P0298942.12 gecP029894212.contig.201	APXS01000001..APXS01000202	96	-	Genbank
Escherichia coli P0298942.14 gecP029894214.contig.204	APXT01000001..APXT01000205	NT	-	Genbank
Escherichia coli P0298942.15 gecP029894215.contig.211	APXU01000001..APXU01000211	NT	-	Genbank
Escherichia coli P0298942.2 gecP02989422.contig.300	APXV01000001..APXV01000299	96	-	Genbank
Escherichia coli P0298942.3 gecP02989423.contig.207	APZO01000001..APZO01000208	96	-	Genbank
Escherichia coli P0298942.4 gecP02989424.contig.224	APZP01000001..APZP01000225	96	-	Genbank
Escherichia coli P0298942.6 gecP02989426.contig.199	APXW01000001..APXW01000200	96	-	Genbank
Escherichia coli P0298942.7 gecP02989427.contig.217	APXX01000001..APXX01000218	NT	-	Genbank
Escherichia coli P0298942.8 gecP02989428.contig.450	APXY01000001..APXY01000442	NT	-	Genbank
Escherichia coli P0298942.9 gecP02989429.contig.400	APXZ01000001..APXZ01000387	96	-	Genbank
Escherichia coli P0299438.10 gecP029943810.contig.103	APYA01000001..APYA01000104	100	ST165 Cplx	Genbank
Escherichia coli P0299438.11 gecP029943811.contig.120	APYB01000001..APYB01000119	3853	-	Genbank
Escherichia coli P0299438.2 gecP02994382.contig.26	AQES01000001..AQES01000027	5276	-	Genbank
Escherichia coli P0299438.3 gecP02994383.contig.117	APYC01000001..APYC01000118	3853	-	Genbank
Escherichia coli P0299438.4 gecP02994384.contig.145	APYD01000001..APYD01000146	NT	-	Genbank
Escherichia coli P0299438.5 gecP02994385.contig.118	APYE01000001..APYE01000118	NT	-	Genbank
Escherichia coli P0299438.6 gecP02994386.contig.137	APYF01000001..APYF01000127	3853	-	Genbank
Escherichia coli P0299438.7 gecP02994387.contig.122	APYG01000001..APYG01000122	NT	-	Genbank
Escherichia coli P0299438.8 gecP02994388.contig.123	APYH01000001..APYH01000122	3853	-	Genbank
Escherichia coli P0299438.9 gecP02994389.contig.134	APYI01000001..APYI01000135	NT	-	Genbank
Escherichia coli P0299483.1 gecP02994831.contig.117	APZQ01000001..APZQ01000118	517	-	Genbank
Escherichia coli P0299483.2 gecP02994832.contig.99	APZR01000001..APZR01000100	517	-	Genbank
Escherichia coli P0299483.3 gecP02994833.contig.131	APZS01000001..APZS01000130	517	-	Genbank
Escherichia coli P02997067.6 gecP029970676.contig.200	APYJ01000001..APYJ01000201	5498	-	Genbank
Escherichia coli P0299917.1 gecP02999171.contig.53	AQER01000001..AQER01000054	5498	-	Genbank
Escherichia coli P0299917.10 gecP029991710.contig.190	APYK01000001..APYK01000190	NT	-	Genbank
Escherichia coli P0299917.2 gecP02999172.contig.177	APYL01000001..APYL01000178	58	ST155 Cplx	Genbank
Escherichia coli P0299917.3 gecP02999173.contig.395	APYM01000001..APYM01000375	58	ST155 Cplx	Genbank
Escherichia coli P0299917.4 gecP02999174.contig.195	APYN01000001..APYN01000196	NT	-	Genbank
Escherichia coli P0299917.5 gecP02999175.contig.209	APYO01000001..APYO01000210	NT	-	Genbank
Escherichia coli P0299917.6 gecP02999176.contig.180	APYP01000001..APYP01000181	58	ST155 Cplx	Genbank
Escherichia coli P0299917.7 gecP02999177.contig.181	APYQ01000001..APYQ01000182	58	ST155 Cplx	Genbank
Escherichia coli P0299917.8 gecP02999178.contig.184	APYR01000001..APYR01000184	58	ST155 Cplx	Genbank
Escherichia coli P0299917.9 gecP02999179.contig.195	APYS01000001..APYS01000196	58	ST155 Cplx	Genbank
Escherichia coli P0301867.1 gecP03018671.contig.35	AQEQ01000001..AQEQ01000036	2332	-	Genbank
Escherichia coli P0301867.11 gecP030186711.contig.151	APYT01000001..APYT01000152	NT	-	Genbank
Escherichia coli P0301867.13 gecP030186713.contig.148	APZT01000001..APZT01000144	2332	-	Genbank
Escherichia coli P0301867.2 gecP03018672.contig.147	APZU01000001..APZU01000148	NT	-	Genbank
Escherichia coli P0301867.3 gecP03018673.contig.138	APYU01000001..APYU01000134	2332	-	Genbank
Escherichia coli P0301867.4 gecP03018674.contig.131	APYV01000001..APYV01000131	2332	-	Genbank
Escherichia coli P0301867.5 gecP03018675.contig.135	APYW01000001..APYW01000136	NT	-	Genbank
Escherichia coli P0301867.7 gecP03018677.contig.135	APYX01000001..APYX01000135	2332	-	Genbank
Escherichia coli P0301867.8 gecP03018678.contig.645	APYY01000001..APYY01000635	2332	-	Genbank
Escherichia coli P0301904.3 gecP03019043.contig.189	APZV01000001..APZV01000190	4	ST10 Cplx	Genbank
Escherichia coli P0302293.10 gecP030229310.contig.442	AQAA01000001..AQAA01000438	155	ST155 Cplx	Genbank
Escherichia coli P0302293.2 gecP03022932.contig.36	AQEP01000001..AQEP01000037	155	ST155 Cplx	Genbank
Escherichia coli P0302293.3 gecP03022933.contig.116	AQAB01000001..AQAB01000116	NT	-	Genbank
Escherichia coli P0302293.4 gecP03022934.contig.133	AQAC01000001..AQAC01000134	NT	-	Genbank
Escherichia coli P0302293.6 gecP03022936.contig.125	AQAD01000001..AQAD01000126	155	ST155 Cplx	Genbank
Escherichia coli P0302293.7 gecP03022937.contig.120	APZW01000001..APZW01000121	155	ST155 Cplx	Genbank
Escherichia coli P0302293.8 gecP03022938.contig.124	AQAE01000001..AQAE01000125	NT	-	Genbank
Escherichia coli P0302293.9 gecP03022939.contig.127	AQAF01000001..AQAF01000127	NT	-	Genbank
Escherichia coli P0302308.1 gecP03023081.contig.43	AQEO01000001..AQEO01000044	1623	-	Genbank
Escherichia coli P0302308.10 gecP030230810.contig.142	APYZ01000001..APYZ01000142	1623	-	Genbank
Escherichia coli P0302308.11 gecP030230811.contig.140	APZA01000001..APZA01000141	1623	-	Genbank
Escherichia coli P0302308.12 gecP030230812.contig.197	APZB01000001..APZB01000197	1623	-	Genbank
Escherichia coli P0302308.13 gecP030230813.contig.364	APZC01000001..APZC01000361	NT	-	Genbank
Escherichia coli P0302308.14 gecP030230814.contig.157	APZD01000001..APZD01000158	1623	-	Genbank
Escherichia coli P0302308.2 gecP03023082.contig.145	APZE01000001..APZE01000143	NT	-	Genbank
Escherichia coli P0302308.3 gecP03023083.contig.131	APZF01000001..APZF01000131	1623	-	Genbank
Escherichia coli P0302308.4 gecP03023084.contig.409	APZG01000001..APZG01000402	1623	-	Genbank
Escherichia coli P0302308.5 gecP03023085.contig.132	APZH01000001..APZH01000133	NT	-	Genbank
Escherichia coli P0304777.1 gecP03047771.contig.39	AQEN01000001..AQEN01000040	423	ST23 Cplx	Genbank
Escherichia coli P0304777.10 gecP030477710.contig.140	AQAG01000001..AQAG01000141	NT	-	Genbank
Escherichia coli P0304777.11 gecP030477711.contig.134	AQAH01000001..AQAH01000134	423	ST23 Cplx	Genbank
Escherichia coli P0304777.12 gecP030477712.contig.140	AQAI01000001..AQAI01000132	NT	-	Genbank
Escherichia coli P0304777.13 gecP030477713.contig.132	AQAJ01000001..AQAJ01000133	NT	-	Genbank
Escherichia coli P0304777.14 gecP030477714.contig.119	AQAK01000001..AQAK01000120	423	ST23 Cplx	Genbank
Escherichia coli P0304777.15 gecP030477715.contig.137	AQAL01000001..AQAL01000138	423	ST23 Cplx	Genbank
Escherichia coli P0304777.2 gecP03047772.contig.215	AQAM01000001..AQAM01000215	NT	-	Genbank
Escherichia coli P0304777.3 gecP03047773.contig.138	AQAN01000001..AQAN01000138	NT	-	Genbank
Escherichia coli P0304777.4 gecP03047774.contig.141	AQAO01000001..AQAO01000142	423	ST23 Cplx	Genbank
Escherichia coli P0304777.5 gecP03047775.contig.523	AQAP01000001..AQAP01000512	423	ST23 Cplx	Genbank
Escherichia coli P0304777.7 gecP03047777.contig.138	AQAQ01000001..AQAQ01000138	NT	-	Genbank
Escherichia coli P0304777.8 gecP03047778.contig.317	AQAR01000001..AQAR01000310	NT	-	Genbank
Escherichia coli P0304777.9 gecP03047779.contig.200	AQAS01000001..AQAS01000200	NT	-	Genbank
Escherichia coli P0304799.3 gecP03047993.contig.492	APZX01000001..APZX01000491	NT	-	Genbank
Escherichia coli P0304816.1 gecP03048161.contig.56	AQEM01000001..AQEM01000057	156	ST156 Cplx	Genbank
Escherichia coli P0304816.10 gecP030481610.contig.179	AQAT01000001..AQAT01000179	NT	-	Genbank
Escherichia coli P0304816.11 gecP030481611.contig.177	AQAU01000001..AQAU01000177	NT	-	Genbank
Escherichia coli P0304816.12 gecP030481612.contig.169	AQAV01000001..AQAV01000170	156	ST156 Cplx	Genbank
Escherichia coli P0304816.13 gecP030481613.contig.182	AQAW01000001..AQAW01000183	156	ST156 Cplx	Genbank
Escherichia coli P0304816.14 gecP030481614.contig.155	AQAX01000001..AQAX01000156	NT	-	Genbank
Escherichia coli P0304816.15 gecP030481615.contig.158	AQAY01000001..AQAY01000159	NT	-	Genbank
Escherichia coli P0304816.2 gecP03048162.contig.173	AQAZ01000001..AQAZ01000174	NT	-	Genbank
Escherichia coli P0304816.3 gecP03048163.contig.178	AQBA01000001..AQBA01000177	NT	-	Genbank
Escherichia coli P0304816.4 gecP03048164.contig.169	AQBB01000001..AQBB01000169	NT	-	Genbank
Escherichia coli P0304816.5 gecP03048165.contig.198	AQBC01000001..AQBC01000197	NT	-	Genbank
Escherichia coli P0304816.6 gecP03048166.contig.163	AQBD01000001..AQBD01000164	156	ST156 Cplx	Genbank
Escherichia coli P0304816.7 gecP03048167.contig.179	AQBE01000001..AQBE01000179	NT	-	Genbank
Escherichia coli P0304816.8 gecP03048168.contig.161	AQBF01000001..AQBF01000161	156	ST156 Cplx	Genbank
Escherichia coli P0304816.9 gecP03048169.contig.193	AQBG01000001..AQBG01000194	NT	-	Genbank
Escherichia coli P0305260.1 gecP03052601.contig.25	AQEL01000001..AQEL01000026	5276	-	Genbank
Escherichia coli P0305260.10 gecP030526010.contig.122	AQBH01000001..AQBH01000122	NT	-	Genbank
Escherichia coli P0305260.11 gecP030526011.contig.127	AQBI01000001..AQBI01000128	NT	-	Genbank
Escherichia coli P0305260.12 gecP030526012.contig.123	AQBJ01000001..AQBJ01000124	5276	-	Genbank
Escherichia coli P0305260.13 gecP030526013.contig.124	AQBK01000001..AQBK01000125	NT	-	Genbank
Escherichia coli P0305260.15 gecP030526015.contig.121	AQBL01000001..AQBL01000122	NT	-	Genbank
Escherichia coli P0305260.2 gecP03052602.contig.121	APZY01000001..APZY01000122	5276	-	Genbank
Escherichia coli P0305260.3 gecP03052603.contig.175	AQBM01000001..AQBM01000175	NT	-	Genbank
Escherichia coli P0305260.4 gecP03052604.contig.138	AQBN01000001..AQBN01000139	NT	-	Genbank
Escherichia coli P0305260.5 gecP03052605.contig.176	AQBO01000001..AQBO01000177	NT	-	Genbank
Escherichia coli P0305260.6 gecP03052606.contig.144	AQBP01000001..AQBP01000145	NT	-	Genbank
Escherichia coli P0305260.7 gecP03052607.contig.131	AQBQ01000001..AQBQ01000132	5276	-	Genbank
Escherichia coli P0305260.8 gecP03052608.contig.127	AQBR01000001..AQBR01000126	5276	-	Genbank
Escherichia coli P0305260.9 gecP03052609.contig.129	AQBS01000001..AQBS01000130	NT	-	Genbank
Escherichia coli p0305293.1 gecp03052931.contig.45	AQEK01000001..AQEK01000046	443	ST205 Cplx	Genbank
Escherichia coli p0305293.10 gecp030529310.contig.190	AQBT01000001..AQBT01000189	443	ST205 Cplx	Genbank
Escherichia coli p0305293.11 gecp030529311.contig.297	AQBU01000001..AQBU01000295	443	ST205 Cplx	Genbank
Escherichia coli p0305293.12 gecp030529312.contig.166	AQBV01000001..AQBV01000165	NT	-	Genbank
Escherichia coli p0305293.13 gecp030529313.contig.694	APZI01000001..APZI01000687	NT	-	Genbank
Escherichia coli p0305293.14 gecp030529314.contig.160	APZZ01000001..APZZ01000161	NT	-	Genbank
Escherichia coli p0305293.15 gecp030529315.contig.166	AQBW01000001..AQBW01000167	443	ST205 Cplx	Genbank
Escherichia coli p0305293.2 gecp03052932.contig.152	AQBX01000001..AQBX01000152	NT	-	Genbank
Escherichia coli p0305293.3 gecp03052933.contig.161	AQBY01000001..AQBY01000161	NT	-	Genbank
Escherichia coli p0305293.4 gecp03052934.contig.243	AQBZ01000001..AQBZ01000244	443	ST205 Cplx	Genbank
Escherichia coli p0305293.5 gecp03052935.contig.253	AQCA01000001..AQCA01000253	NT	-	Genbank
Escherichia coli p0305293.6 gecp03052936.contig.405	AQCB01000001..AQCB01000406	NT	-	Genbank
Escherichia coli p0305293.7 gecp03052937.contig.195	AQCC01000001..AQCC01000195	NT	-	Genbank
Escherichia coli p0305293.8 gecp03052938.contig.174	AQCD01000001..AQCD01000164	443	ST205 Cplx	Genbank
Escherichia coli p0305293.9 gecp03052939.contig.194	AQCE01000001..AQCE01000194	443	ST205 Cplx	Genbank
Escherichia coli P12b	CP002291	10	ST10 Cplx	Genbank
Escherichia coli P4-96 contig00097	AHHO01000001..AHHO01000097	602	ST446 Cplx	Genbank
Escherichia coli P4-NR contig00107	AHHP01000001..AHHP01000107	602	ST446 Cplx	Genbank
Escherichia coli PA10 PA10.contig.644_1	AKLF01000001..AKLF01000620	11	ST11 Cplx	Genbank
Escherichia coli PA11 gecPA11.contig.121	AOEI01000001..AOEI01000122	11	ST11 Cplx	Genbank
Escherichia coli PA13 gecPA13.contig.139_1	AOEK01000001..AOEK01000140	11	ST11 Cplx	Genbank
Escherichia coli PA14 PA14.contig.681_2	AKLG01000001..AKLG01000615	11	ST11 Cplx	Genbank
Escherichia coli PA15 PA15.contig.595_1	AKLH01000001..AKLH01000530	11	ST11 Cplx	Genbank
Escherichia coli PA19 gecPA19.contig.137_1	AOEJ01000001..AOEJ01000136	11	ST11 Cplx	Genbank
Escherichia coli PA2 gecPA2.contig.109_1	AOEL01000001..AOEL01000110	11	ST11 Cplx	Genbank
Escherichia coli PA22 PA22.contig.74	AKLI01000001..AKLI01000075	11	ST11 Cplx	Genbank
Escherichia coli PA23 PA23.contig.503_2	AMUB01000001..AMUB01000475	11	ST11 Cplx	Genbank
Escherichia coli PA24 PA24.contig.559_1	AKLJ01000001..AKLJ01000513	11	ST11 Cplx	Genbank
Escherichia coli PA25 PA25.contig.542_3	AKLK01000001..AKLK01000463	11	ST11 Cplx	Genbank
Escherichia coli PA28 PA28.contig.537_1	AKLL01000001..AKLL01000472	11	ST11 Cplx	Genbank
Escherichia coli PA3 PA3.contig.543_1	AKLC01000001..AKLC01000508	11	ST11 Cplx	Genbank
Escherichia coli PA31 PA31.contig.626_2	AKLM01000001..AKLM01000598	11	ST11 Cplx	Genbank
Escherichia coli PA32 PA32.contig.682_1	AKLN01000001..AKLN01000607	11	ST11 Cplx	Genbank
Escherichia coli PA33 PA33.contig.637_1	AKLO01000001..AKLO01000596	5623	-	Genbank
Escherichia coli PA34 PA34.contig.438_1	AMTR01000001..AMTR01000392	5495	-	Genbank
Escherichia coli PA35 pa35.contig.150_1	AOES01000001..AOES01000151	11	ST11 Cplx	Genbank
Escherichia coli PA38 PA38.contig.681_1	AMUO01000001..AMUO01000606	11	ST11 Cplx	Genbank
Escherichia coli PA39 PA39.contig.925_1	AKLP01000001..AKLP01000889	11	ST11 Cplx	Genbank
Escherichia coli PA4 PA4.contig.515_1	AMUA01000001..AMUA01000455	11	ST11 Cplx	Genbank
Escherichia coli PA40 PA40.contig.65	AKLQ01000001..AKLQ01000066	11	ST11 Cplx	Genbank
Escherichia coli PA41 PA41.contig.645_1	AKLR01000001..AKLR01000566	11	ST11 Cplx	Genbank
Escherichia coli PA42 PA42.contig.526_1	AKLS01000001..AKLS01000467	11	ST11 Cplx	Genbank
Escherichia coli PA45 PA45.contig.498_2	AMUD01000001..AMUD01000453	11	ST11 Cplx	Genbank
Escherichia coli PA47 gecPA47.contig.157_1	AOEM01000001..AOEM01000158	11	ST11 Cplx	Genbank
Escherichia coli PA48 gecPA48.contig.140_1	AOEN01000001..AOEN01000137	11	ST11 Cplx	Genbank
Escherichia coli PA49 PA49.contig.548_11	AMUC01000001..AMUC01000531	11	ST11 Cplx	Genbank
Escherichia coli PA5 PA5.contig.620_1	AKLD01000001..AKLD01000554	11	ST11 Cplx	Genbank
Escherichia coli PA7 PA7.contig.63	AMTQ01000001..AMTQ01000064	11	ST11 Cplx	Genbank
Escherichia coli PA8 gecPA8.contig.124_1	AOEO01000001..AOEO01000123	11	ST11 Cplx	Genbank
Escherichia coli PA9 PA9.contig.484_1	AKLE01000001..AKLE01000427	11	ST11 Cplx	Genbank
Escherichia coli PCN033 contig99	AFAT01000001..AFAT01000174	5147	-	Genbank
Escherichia coli PMV-1 plasmid pECOS88like WGS CBTO000000000 project data, contig 2	CBTO010000001..CBTO010000002	NT	-	Genbank
Escherichia coli RN587/1 RN587.assembly.9	ADUS01000001..ADUS01000073	725	-	Genbank
Escherichia coli S17 contig187	AOGN01000001..AOGN01000187	10	ST10 Cplx	Genbank
Escherichia coli S88	CU928146..CU928161	95	ST95 Cplx	Genbank
Escherichia coli SCD1 contig130	ATJZ01000001..ATJZ01000130	NT	-	Genbank
Escherichia coli SCD2 contig123	ATKA01000001..ATKA01000123	NT	-	Genbank
Escherichia coli SCI-07 contig68	AJFG01000001..AJFG01000068	363	-	Genbank
Escherichia coli SE11	AP009240..AP009246	156	ST156 Cplx	Genbank
Escherichia coli SE15	AP009378..AP009379	131	ST131 Cplx	Genbank
Escherichia coli SEPT362 contig173	AOGL01000001..AOGL01000173	117	-	Genbank
Escherichia coli SMS-3-5	CP000970..CP000974	354	ST354 Cplx	Genbank
Escherichia coli STEC O174:H2 str. 02-04446	AQGP00000000.1	661	-	Genbank
Escherichia coli STEC O174:H46 str. I-151	AQGO00000000.1	1131	-	Genbank
Escherichia coli STEC O174:H8 str. 02-07607	AQGN00000000.1	13	ST13 Cplx	Genbank
Escherichia coli STEC_7v gec7v.contig.28	AEXD01000001..AEXD01000029	2715	-	Genbank
Escherichia coli STEC_94C	AFDU01000001..AFDU01000037	2103	-	Genbank
Escherichia coli STEC_B2F1 gecB2F1.contig.36	AFDQ01000001..AFDQ01000037	442	-	Genbank
Escherichia coli STEC_C165-02 gecC165.contig.29	AFDR01000001..AFDR01000030	69	ST69 Cplx	Genbank
Escherichia coli STEC_DG131-3 gecDG131.contig.65	AFDV01000001..AFDV01000066	13	ST13 Cplx	Genbank
Escherichia coli STEC_EH250 gecEH250.contig.40	AFDW01000001..AFDW01000041	10	ST10 Cplx	Genbank
Escherichia coli STEC_H.1.8 gecH18.contig.82	AFDY01000001..AFDY01000075	20	ST20 Cplx	Genbank
Escherichia coli STEC_MHI813 gecMHI813.contig.29	AFDZ01000001..AFDZ01000030	3233	-	Genbank
Escherichia coli STEC_O31 gecO31.contig.45	AFEX01000001..AFEX01000046	677	-	Genbank
Escherichia coli STEC_S1191 gecS1191.contig.38	AFEA01000001..AFEA01000039	1260	-	Genbank
Escherichia coli str. 'clone D i14'	CP002212	73	ST73 Cplx	Genbank
Escherichia coli str. 'clone D i2'	CP002211	73	ST73 Cplx	Genbank
Escherichia coli str. K12 substr. DH10B	CP000948	1060	-	Genbank
Escherichia coli str. K-12 substr. MDS42	AP012306	10	ST10 Cplx	Genbank
Escherichia coli str. K-12 substr. MG1655	U00096	10	ST10 Cplx	Genbank
Escherichia coli str. K-12 substr. MG1655 chromosome	AKBV00000000.1	10	ST10 Cplx	Genbank
Escherichia coli str. K-12 substr. MG1655 strain K-12	AYEK00000000.1	10	ST10 Cplx	Genbank
Escherichia coli str. K-12 substr. MG1655 strain K-12	AJGD00000000.1	10	ST10 Cplx	Genbank
Escherichia coli str. K-12 substr. MG1655star chromosome	CM000960.1	10	ST10 Cplx	Genbank
Escherichia coli str. K12 substr. W3110	AP009048	10	ST10 Cplx	Genbank
Escherichia coli strain 2009-46	JJNT00000000.1	127	-	Genbank
Escherichia coli strain 48	JPQG00000000.1	2369	-	Genbank
Escherichia coli strain CS01	JNOE00000000.1	NT	-	Genbank
Escherichia coli strain CS02	JNOF00000000.1	NT	-	Genbank
Escherichia coli strain CS03	JNOG00000000.1	NT	-	Genbank
Escherichia coli strain CS04	JNOH00000000.1	NT	-	Genbank
Escherichia coli strain CS05	JNOI00000000.1	NT	-	Genbank
Escherichia coli strain CS06	JNOJ00000000.1	NT	-	Genbank
Escherichia coli strain E455	JEND02000000.1	1244	-	Genbank
Escherichia coli strain E455L	JENE03000000.1	1244	-	Genbank
Escherichia coli strain EC1	JFJM00000000.1	69	ST69 Cplx	Genbank
Escherichia coli strain O25b-ST131	JJNV00000000.1	131	ST131 Cplx	Genbank
Escherichia coli strain S5274	JICB00000000.1	NT	-	Genbank
Escherichia coli strain S6400	JICE00000000.1	28	ST28 Cplx	Genbank
Escherichia coli strain S6662	JICC00000000.1	3	ST20 Cplx	Genbank
Escherichia coli strain S6685	JICA00000000.1	NT	-	Genbank
Escherichia coli strain S6966	JICI00000000.1	5342	-	Genbank
Escherichia coli strain S6995	JICH00000000.1	1283	-	Genbank
Escherichia coli strain S7005	JICG00000000.1	3	ST20 Cplx	Genbank
Escherichia coli strain S7380	JICD00000000.1	3	ST20 Cplx	Genbank
Escherichia coli strain S7438	JICF00000000.1	5342	-	Genbank
Escherichia coli strain SCB34	JMKH00000000.1	131	ST131 Cplx	Genbank
Escherichia coli strain UCD_JA03	JFFJ00000000.1	974	-	Genbank
Escherichia coli strain UCD_JA03_pb	JMIZ00000000.1	974	-	Genbank
Escherichia coli strain UCD_JA17	JFFK00000000.1	73	ST73 Cplx	Genbank
Escherichia coli strain UCD_JA17_pb	JMJA00000000.1	73	ST73 Cplx	Genbank
Escherichia coli strain UCD_JA23	JFFL00000000.1	73	ST73 Cplx	Genbank
Escherichia coli strain UCD_JA23_pb	JMJB00000000.1	73	ST73 Cplx	Genbank
Escherichia coli strain UCD_JA62	JFFM00000000.1	131	ST131 Cplx	Genbank
Escherichia coli strain UCD_JA62_pb	JMJC00000000.1	NT	-	Genbank
Escherichia coli strain UCD_JA65	JFFN00000000.1	3205	-	Genbank
Escherichia coli strain UCD_JA65_pb	JMJD00000000.1	3205	-	Genbank
Escherichia coli strain UCD_JA69	JFFO00000000.1	69	ST69 Cplx	Genbank
Escherichia coli strain UCD_JA69_pb	JMJE00000000.1	69	ST69 Cplx	Genbank
Escherichia coli strain W25K	JNBX00000000.1	100	ST165 Cplx	Genbank
Escherichia coli SWW33 acLZF-supercont1.11.C38	AQFX01000001..AQFX01000038	491	-	Genbank
Escherichia coli T1282_01 gecT128201.contig.142	AVRM01000001..AVRM01000140	11	ST11 Cplx	Genbank
Escherichia coli T1840_97 gecT184097.contig.128	AVRN01000001..AVRN01000129	11	ST11 Cplx	Genbank
Escherichia coli T234_00 gecT23400.contig.132	AVRO01000001..AVRO01000132	11	ST11 Cplx	Genbank
Escherichia coli T924_01 gecT92401.contig.131	AVRP01000001..AVRP01000131	11	ST11 Cplx	Genbank
Escherichia coli TA007 cont2.232	AEHY01000001..AEHY01000232	3770	-	Genbank
Escherichia coli TA124 cont1.127	AFQI01000001..AFQI01000127	1931	-	Genbank
Escherichia coli TA143 genomic scaffold supercont1.43	GL884206..GL884248	1884	-	Genbank
Escherichia coli TA206 genomic scaffold supercont1.38	GL884168..GL884205	1386	-	Genbank
Escherichia coli TA271 genomic scaffold supercont1.83	GL884249..GL884331	58	ST155 Cplx	Genbank
Escherichia coli TA280 genomic scaffold supercont1.76	GL884332..GL884407	NT	-	Genbank
Escherichia coli ThroopD gecThroopD.contig.43	AQEJ01000001..AQEJ01000043	5392	-	Genbank
Escherichia coli TOP2662-3 1	AOQY00000000.1	NT	-	Genbank
Escherichia coli TT12B TT12B.contig.347_1	AMUE01000001..AMUE01000357	11	ST11 Cplx	Genbank
Escherichia coli TTSH84137	CBVN000000000.1	NT	-	Genbank
Escherichia coli TW00353 TW00353.contig.213_1	AMUM01000001..AMUM01000228	10	ST10 Cplx	Genbank
Escherichia coli TW06591 TW06591.contig.44	AKLT01000001..AKLT01000045	11	ST11 Cplx	Genbank
Escherichia coli TW07509 gecTW07509.contig.90	AVRH01000001..AVRH01000091	642	ST278 Cplx	Genbank
Escherichia coli TW07793 Contig1660629520	AFAG02000001..AFAG02000008	1041	-	Genbank
Escherichia coli TW07945 TW07945.contig.420_1	AKLU01000001..AKLU01000404	11	ST11 Cplx	Genbank
Escherichia coli TW09098 TW09098.contig.555_1	AKLX01000001..AKLX01000486	11	ST11 Cplx	Genbank
Escherichia coli TW09109 TW09109.contig.65	AKLY01000001..AKLY01000066	11	ST11 Cplx	Genbank
Escherichia coli TW09195 TW09195.contig.1328_1	AKLZ01000001..AKLZ01001288	11	ST11 Cplx	Genbank
Escherichia coli TW10119 TW10119.contig.55	AKMA01000001..AKMA01000056	11	ST11 Cplx	Genbank
Escherichia coli TW10246 TW10246.contig.46	AKLV01000001..AKLV01000047	11	ST11 Cplx	Genbank
Escherichia coli TW10509 cont2.92	AEHW01000001..AEHW01000092	747	-	Genbank
Escherichia coli TW10598	AELA00000000.1	4	ST10 Cplx	Genbank
Escherichia coli TW10722	AELB00000000.1	443	ST205 Cplx	Genbank
Escherichia coli TW10828	AELC00000000.1	173	-	Genbank
Escherichia coli TW11039 TW11039.contig.70	AKLW01000001..AKLW01000071	NT	-	Genbank
Escherichia coli TW11681	AELD00000000.1	2332	-	Genbank
Escherichia coli TW14301 TW14301.contig.531_1	AKME01000001..AKME01000485	11	ST11 Cplx	Genbank
Escherichia coli TW14313 TW14313.contig.771_1	AKMD01000001..AKMD01000727	11	ST11 Cplx	Genbank
Escherichia coli TW14425	AELE00000000.1	23	ST23 Cplx	Genbank
Escherichia coli TW15901 TW15901.contig.229_1	AMUK01000001..AMUK01000248	10	ST10 Cplx	Genbank
Escherichia coli Tx1686 gecTX1686.contig.125	AVSN01000001..AVSN01000126	11	ST11 Cplx	Genbank
Escherichia coli TX1999 gecTX1999.contig.93	AFEB01000001..AFEB01000093	90	ST23 Cplx	Genbank
Escherichia coli Tx3800 gecTX3800.contig.139	AVSO01000001..AVSO01000139	11	ST11 Cplx	Genbank
Escherichia coli UCI 51 aedZe-supercont1.16.C42	JMVR01000001..JMVR01000042	131	ST131 Cplx	Genbank
Escherichia coli UCI 53 aeeaW-supercont1.13.C30	JMVS01000001..JMVS01000030	410	ST23 Cplx	Genbank
Escherichia coli UCI 57 aedZc-supercont1.8.C32	JMVT01000001..JMVT01000032	5340	-	Genbank
Escherichia coli UCI 58 aedZv-supercont1.12.C34	JMVU01000001..JMVU01000034	5340	-	Genbank
Escherichia coli UCI 65 aeeaY-supercont1.12.C55	JMVV01000001..JMVV01000055	38	ST38 Cplx	Genbank
Escherichia coli UCI 66 aedZC-supercont1.13.C33	JMVW01000001..JMVW01000033	88	ST23 Cplx	Genbank
Escherichia coli UM146	CP002167..CP002168	643	ST95 Cplx	Genbank
Escherichia coli UMEA 3014-1 acYxL-supercont1.10.C32	AWAT01000001..AWAT01000032	73	ST73 Cplx	Genbank
Escherichia coli UMEA 3022-1 acYzv-supercont1.10.C29	AWAU01000001..AWAU01000029	127	-	Genbank
Escherichia coli UMEA 3033-1 acYAi-supercont1.11.C54	AWAV01000001..AWAV01000054	38	ST38 Cplx	Genbank
Escherichia coli UMEA 3041-1 acYyc-supercont1.10.C56	AWAW01000001..AWAW01000056	95	ST95 Cplx	Genbank
Escherichia coli UMEA 3052-1 acYAt-supercont1.11.C68	AWAX01000001..AWAX01000068	1823	-	Genbank
Escherichia coli UMEA 3053-1 acYxz-supercont1.16.C45	AWAY01000001..AWAY01000045	537	ST14 Cplx	Genbank
Escherichia coli UMEA 3065-1 acYzx-supercont1.6.C31	AWAZ01000001..AWAZ01000031	200	ST40 Cplx	Genbank
Escherichia coli UMEA 3087-1 acYxV-supercont1.16.C41	AWBA01000001..AWBA01000041	1663	-	Genbank
Escherichia coli UMEA 3088-1 acYyG-supercont1.7.C51	AWBB01000001..AWBB01000051	1057	-	Genbank
Escherichia coli UMEA 3097-1 acYxj-supercont1.8.C31	AWBC01000001..AWBC01000031	127	-	Genbank
Escherichia coli UMEA 3108-1 acYyd-supercont1.38.C54	AWBD01000001..AWBD01000054	5317	-	Genbank
Escherichia coli UMEA 3113-1 acYzw-supercont1.13.C38	AWBE01000001..AWBE01000038	127	-	Genbank
Escherichia coli UMEA 3117-1 acYAj-supercont1.7.C30	AWBF01000001..AWBF01000030	420	-	Genbank
Escherichia coli UMEA 3121-1 acYwR-supercont1.13.C41	AWBG01000001..AWBG01000041	73	ST73 Cplx	Genbank
Escherichia coli UMEA 3122-1 acYzc-supercont1.28.C69	AWBH01000001..AWBH01000069	550	ST14 Cplx	Genbank
Escherichia coli UMEA 3124-1 acYzE-supercont1.9.C44	AWBI01000001..AWBI01000044	1011	-	Genbank
Escherichia coli UMEA 3139-1 acYzY-supercont1.21.C114	AWBJ01000001..AWBJ01000114	10	ST10 Cplx	Genbank
Escherichia coli UMEA 3140-1 acYxZ-supercont1.10.C68	AWBK01000001..AWBK01000068	95	ST95 Cplx	Genbank
Escherichia coli UMEA 3144-1 acYAx-supercont1.3.C47	AWBL01000001..AWBL01000047	393	ST31 Cplx	Genbank
Escherichia coli UMEA 3148-1 acYwS-supercont1.13.C59	AWBM01000001..AWBM01000059	10	ST10 Cplx	Genbank
Escherichia coli UMEA 3150-1 acYyU-supercont1.11.C47	AWBN01000001..AWBN01000047	10	ST10 Cplx	Genbank
Escherichia coli UMEA 3151-1 acYAl-supercont1.8.C62	AWBO01000001..AWBO01000062	746	-	Genbank
Escherichia coli UMEA 3152-1 acYzT-supercont1.19.C28	AWBP01000001..AWBP01000028	722	-	Genbank
Escherichia coli UMEA 3155-1 acYxp-supercont1.10.C35	AWBQ01000001..AWBQ01000035	1851	-	Genbank
Escherichia coli UMEA 3159-1 acYym-supercont1.18.C43	AWBR01000001..AWBR01000043	73	ST73 Cplx	Genbank
Escherichia coli UMEA 3160-1 acYyl-supercont1.12.C33	AWBS01000001..AWBS01000033	372	-	Genbank
Escherichia coli UMEA 3161-1 acYwT-supercont1.16.C33	AWBT01000001..AWBT01000033	968	-	Genbank
Escherichia coli UMEA 3162-1 acYyD-supercont1.16.C49	AWBU01000001..AWBU01000049	5407	-	Genbank
Escherichia coli UMEA 3163-1 acYxk-supercont1.7.C46	AWBV01000001..AWBV01000046	38	ST38 Cplx	Genbank
Escherichia coli UMEA 3172-1 acYzX-supercont1.13.C46	AWBW01000001..AWBW01000046	73	ST73 Cplx	Genbank
Escherichia coli UMEA 3173-1 acYzs-supercont1.16.C43	AWBX01000001..AWBX01000043	73	ST73 Cplx	Genbank
Escherichia coli UMEA 3174-1 acYys-supercont1.31.C79	AWBY01000001..AWBY01000079	10	ST10 Cplx	Genbank
Escherichia coli UMEA 3175-1 acYyL-supercont1.11.C50	AWBZ01000001..AWBZ01000050	73	ST73 Cplx	Genbank
Escherichia coli UMEA 3176-1 acYyH-supercont1.11.C42	AWCA01000001..AWCA01000042	336	ST278 Cplx	Genbank
Escherichia coli UMEA 3178-1 acYyN-supercont1.19.C57	AWCB01000001..AWCB01000057	73	ST73 Cplx	Genbank
Escherichia coli UMEA 3180-1 acYyC-supercont1.17.C55	AWCC01000001..AWCC01000055	10	ST10 Cplx	Genbank
Escherichia coli UMEA 3185-1 acYzN-supercont1.9.C29	AWCD01000001..AWCD01000029	12	ST12 Cplx	Genbank
Escherichia coli UMEA 3190-1 acYyT-supercont1.31.C103	AWCE01000001..AWCE01000103	59	ST59 Cplx	Genbank
Escherichia coli UMEA 3193-1 acYyg-supercont1.21.C46	AWCF01000001..AWCF01000046	12	ST12 Cplx	Genbank
Escherichia coli UMEA 3199-1 acYzU-supercont1.6.C55	AWCG01000001..AWCG01000055	10	ST10 Cplx	Genbank
Escherichia coli UMEA 3200-1 acYwY-supercont1.12.C63	AWCH01000001..AWCH01000063	2	-	Genbank
Escherichia coli UMEA 3201-1 acYwO-supercont1.19.C62	AWCI01000001..AWCI01000062	295	-	Genbank
Escherichia coli UMEA 3203-1 acYwM-supercont1.20.C52	AWCJ01000001..AWCJ01000052	95	ST95 Cplx	Genbank
Escherichia coli UMEA 3206-1 acYwZ-supercont1.12.C48	AWCK01000001..AWCK01000048	95	ST95 Cplx	Genbank
Escherichia coli UMEA 3208-1 acYyv-supercont1.11.C48	AWCL01000001..AWCL01000048	73	ST73 Cplx	Genbank
Escherichia coli UMEA 3212-1 acYxm-supercont1.21.C102	AWCM01000001..AWCM01000102	5423	-	Genbank
Escherichia coli UMEA 3215-1 acYAb-supercont1.10.C44	AWCN01000001..AWCN01000044	404	ST14 Cplx	Genbank
Escherichia coli UMEA 3216-1 acYxU-supercont1.13.C34	AWCO01000001..AWCO01000034	73	ST73 Cplx	Genbank
Escherichia coli UMEA 3217-1 acYzC-supercont1.7.C26	AWCP01000001..AWCP01000026	127	-	Genbank
Escherichia coli UMEA 3220-1 acYzi-supercont1.16.C33	AWCQ01000001..AWCQ01000033	73	ST73 Cplx	Genbank
Escherichia coli UMEA 3221-1 acYAz-supercont1.11.C70	AWCR01000001..AWCR01000070	80	ST568 Cplx	Genbank
Escherichia coli UMEA 3222-1 acYzG-supercont1.24.C52	AWCS01000001..AWCS01000052	73	ST73 Cplx	Genbank
Escherichia coli UMEA 3230-1 acYzr-supercont1.13.C43	AWCT01000001..AWCT01000043	80	ST568 Cplx	Genbank
Escherichia coli UMEA 3233-1 acYyA-supercont1.14.C32	AWCU01000001..AWCU01000032	73	ST73 Cplx	Genbank
Escherichia coli UMEA 3240-1 acYxP-supercont1.8.C60	AWCV01000001..AWCV01000060	540	-	Genbank
Escherichia coli UMEA 3244-1 acYAq-supercont1.15.C31	AWCW01000001..AWCW01000031	12	ST12 Cplx	Genbank
Escherichia coli UMEA 3257-1 acYyt-supercont1.20.C61	AWCX01000001..AWCX01000061	73	ST73 Cplx	Genbank
Escherichia coli UMEA 3264-1 acXtO-supercont1.13.C43	AWCY01000001..AWCY01000043	73	ST73 Cplx	Genbank
Escherichia coli UMEA 3268-1 acYzJ-supercont1.9.C27	AWCZ01000001..AWCZ01000027	73	ST73 Cplx	Genbank
Escherichia coli UMEA 3271-1 acYwK-supercont1.19.C76	AWDA01000001..AWDA01000076	10	ST10 Cplx	Genbank
Escherichia coli UMEA 3290-1 addTS-supercont1.7.C29	AYHJ01000001..AYHJ01000029	127	-	Genbank
Escherichia coli UMEA 3292-1 acXut-supercont1.26.C92	AWDB01000001..AWDB01000092	29	ST29 Cplx	Genbank
Escherichia coli UMEA 3298-1 acYxW-supercont1.13.C46	AWDC01000001..AWDC01000046	95	ST95 Cplx	Genbank
Escherichia coli UMEA 3304-1 acYxg-supercont1.26.C99	AWDD01000001..AWDD01000099	59	ST59 Cplx	Genbank
Escherichia coli UMEA 3314-1 acXtZ-supercont1.10.C63	AWDE01000001..AWDE01000063	540	-	Genbank
Escherichia coli UMEA 3317-1 acYxr-supercont1.6.C37	AWDF01000001..AWDF01000037	5332	-	Genbank
Escherichia coli UMEA 3318-1 acYxB-supercont1.14.C58	AWDG01000001..AWDG01000058	10	ST10 Cplx	Genbank
Escherichia coli UMEA 3323-1 addTH-supercont1.19.C87	AYHL01000001..AYHL01000087	5377	-	Genbank
Escherichia coli UMEA 3329-1 acYxN-supercont1.9.C37	AWDH01000001..AWDH01000037	5514	-	Genbank
Escherichia coli UMEA 3336-1 addSZ-supercont1.8.C30	AYHH01000001..AYHH01000030	1128	-	Genbank
Escherichia coli UMEA 3337-1 acYwJ-supercont1.8.C39	AWDI01000001..AWDI01000039	73	ST73 Cplx	Genbank
Escherichia coli UMEA 3341-1 acXuj-supercont1.12.C26	AWDJ01000001..AWDJ01000026	127	-	Genbank
Escherichia coli UMEA 3342-1 addTq-supercont1.13.C33	AYHM01000001..AYHM01000033	73	ST73 Cplx	Genbank
Escherichia coli UMEA 3355-1 acYzd-supercont1.8.C35	AWDK01000001..AWDK01000035	88	ST23 Cplx	Genbank
Escherichia coli UMEA 3391-1 acXuX-supercont1.9.C35	AWDL01000001..AWDL01000035	141	-	Genbank
Escherichia coli UMEA 3426-1 addUl-supercont1.12.C37	AYHI01000001..AYHI01000037	127	-	Genbank
Escherichia coli UMEA 3489-1 adibL-supercont1.7.C22	AZJO01000001..AZJO01000022	2622	-	Genbank
Escherichia coli UMEA 3490-1 acYwy-supercont1.9.C38	AWDM01000001..AWDM01000038	73	ST73 Cplx	Genbank
Escherichia coli UMEA 3585-1 acYzp-supercont1.5.C34	AWDN01000001..AWDN01000034	127	-	Genbank
Escherichia coli UMEA 3592-1 acXuG-supercont1.8.C54	AWDO01000001..AWDO01000054	10	ST10 Cplx	Genbank
Escherichia coli UMEA 3609-1 acYAw-supercont1.7.C66	AWDP01000001..AWDP01000066	10	ST10 Cplx	Genbank
Escherichia coli UMEA 3617-1 acYyX-supercont1.22.C46	AWDQ01000001..AWDQ01000046	127	-	Genbank
Escherichia coli UMEA 3632-1 acYzV-supercont1.8.C33	AWDR01000001..AWDR01000033	95	ST95 Cplx	Genbank
Escherichia coli UMEA 3656-1 acYAp-supercont1.14.C28	AWDT01000001..AWDT01000028	1441	-	Genbank
Escherichia coli UMEA 3662-1 acXuR-supercont1.5.C22	AWDU01000001..AWDU01000022	95	ST95 Cplx	Genbank
Escherichia coli UMEA 3671-1 acXux-supercont1.10.C37	AWDV01000001..AWDV01000037	543	-	Genbank
Escherichia coli UMEA 3682-1 acYzk-supercont1.2.C37	AWDW01000001..AWDW01000037	1122	-	Genbank
Escherichia coli UMEA 3687-1 acXtP-supercont1.13.C48	AWDX01000001..AWDX01000048	73	ST73 Cplx	Genbank
Escherichia coli UMEA 3693-1 addTV-supercont1.17.C42	AYHK01000001..AYHK01000042	12	ST12 Cplx	Genbank
Escherichia coli UMEA 3694-1 acYxD-supercont1.8.C33	AWDY01000001..AWDY01000033	73	ST73 Cplx	Genbank
Escherichia coli UMEA 3702-1 acYxx-supercont1.10.C33	AWDZ01000001..AWDZ01000033	95	ST95 Cplx	Genbank
Escherichia coli UMEA 3703-1 acYya-supercont1.17.C42	AWEA01000001..AWEA01000042	640	-	Genbank
Escherichia coli UMEA 3705-1 acYAu-supercont1.17.C49	AWEB01000001..AWEB01000049	73	ST73 Cplx	Genbank
Escherichia coli UMEA 3707-1 acXuO-supercont1.18.C43	AWEC01000001..AWEC01000043	73	ST73 Cplx	Genbank
Escherichia coli UMEA 3718-1 acYyo-supercont1.15.C79	AWED01000001..AWED01000079	219	-	Genbank
Escherichia coli UMEA 3805-1 acXuM-supercont1.16.C34	AWEE01000001..AWEE01000034	4198	-	Genbank
Escherichia coli UMEA 3821-1 acYAe-supercont1.17.C38	AWEF01000001..AWEF01000038	73	ST73 Cplx	Genbank
Escherichia coli UMEA 3834-1 acXtH-supercont1.15.C58	AWEG01000001..AWEG01000058	95	ST95 Cplx	Genbank
Escherichia coli UMEA 3889-1 acYxi-supercont1.9.C43	AWEH01000001..AWEH01000043	10	ST10 Cplx	Genbank
Escherichia coli UMEA 3893-1 acYAy-supercont1.9.C39	AWEI01000001..AWEI01000039	95	ST95 Cplx	Genbank
Escherichia coli UMEA 3899-1 acYxE-supercont1.36.C102	AWEJ01000001..AWEJ01000102	62	-	Genbank
Escherichia coli UMEA 3955-1 acYwD-supercont1.16.C48	AWEK01000001..AWEK01000048	12	ST12 Cplx	Genbank
Escherichia coli UMEA 4075-1 acYzl-supercont1.9.C33	AWEL01000001..AWEL01000033	12	ST12 Cplx	Genbank
Escherichia coli UMEA 4076-1 acYzm-supercont1.11.C38	AWEM01000001..AWEM01000038	706	-	Genbank
Escherichia coli UMEA 4207-1 acYyY-supercont1.13.C30	AWEN01000001..AWEN01000030	73	ST73 Cplx	Genbank
Escherichia coli UMN026	CU928148..CU928163	597	ST69 Cplx	Genbank
Escherichia coli UMNF18 chromosome	AGTD01000001..AGTD01000006	10	ST10 Cplx	Genbank
Escherichia coli UMNK88	CP002729..HQ023862	100	ST165 Cplx	Genbank
Escherichia coli UTI89	CP000243..CP000244	95	ST95 Cplx	Genbank
Escherichia coli W	CP002967..CP002969	1079	-	Genbank
Escherichia coli W	CP002185..CP002187	1079	-	Genbank
Escherichia coli W ctg00121	AEDF01000001..AEDF01000088	1079	-	Genbank
Escherichia coli W26 1.ECW26.1_165	AGIA01000001..AGIA01000165	1081	-	Genbank
Escherichia coli WV_060327	AERT01000001..AERT01000028	NT	-	Genbank
Escherichia coli XH001 Contig107	AFYG01000001..AFYG01000108	10	ST10 Cplx	Genbank
Escherichia coli XH140A Contig95	AFVX01000001..AFVX01000096	10	ST10 Cplx	Genbank
Escherichia coli Xuzhou21	CP001925..CP001927	11	ST11 Cplx	Genbank
Klebsiella pneumoniae 909957 E_coliHMPREF1619-1.0_Cont797.1	AXUL01000001..AXUL01000261	NT	-	Genbank
Klebsiella pneumoniae LAU-KP1	AYQE00000000.1	NT	-	Genbank
Escherichia coli 0.1288 genomic scaffold E01288.contig.190	NZ_JH943333..NZ_JH943468	5559	-	Refseq
Escherichia coli 0.1304 genomic scaffold E01304.contig.624	NZ_JH942825..NZ_JH943332	11	ST11 Cplx	Refseq
Escherichia coli 042	NC_017626..NC_017627	414	-	Refseq
Escherichia coli 07798 genomic scaffold E07798.contig.252	NZ_JH964301..NZ_JH964525	5611	-	Refseq
Escherichia coli 09BKT078844 genomic scaffold gec09BKT078844.contig.883	NZ_KB452661..NZ_KB453277	11	ST11 Cplx	Refseq
Escherichia coli 1.2264 Contig1548	NZ_AEZO02000001..NZ_AEZO02000031	675	-	Refseq
Escherichia coli 1.2741 Contig1651129016	NZ_AEZI02000001..NZ_AEZI02000028	2715	-	Refseq
Escherichia coli 10.0821 gec100821.contig.107	NZ_AMTO01000001..NZ_AMTO01000108	11	ST11 Cplx	Refseq
Escherichia coli 10.0833 genomic scaffold gec100833.contig.549	NZ_JH969093..NZ_JH969508	11	ST11 Cplx	Refseq
Escherichia coli 10.0869 genomic scaffold gec100869.contig.489	NZ_JH968349..NZ_JH968733	11	ST11 Cplx	Refseq
Escherichia coli 101-1 gcontig_1112603667253	NZ_AAMK02000001..NZ_AAMK02000091	5655	-	Refseq
Escherichia coli 1827-70 gec1827.assembly.9	NZ_ADUK01000001..NZ_ADUK01000035	398	ST398 Cplx	Refseq
Escherichia coli 2.3916 ctg1127168676001	NZ_AFAB02000001..NZ_AFAB02000234	10	ST10 Cplx	Refseq
Escherichia coli 2.4168 ctg1126004750283	NZ_AFAD02000001..NZ_AFAD02000019	10	ST10 Cplx	Refseq
Escherichia coli 2362-75 gec2362.assembly.9	NZ_ADUL01000001..NZ_ADUL01000083	19	-	Refseq
Escherichia coli 2534-86 gec2534_86.contig.75	NZ_AFDS01000001..NZ_AFDS01000075	16	ST29 Cplx	Refseq
Escherichia coli 3.2303 ctg1125843265933	NZ_AFAE02000001..NZ_AFAE02000035	10	ST10 Cplx	Refseq
Escherichia coli 3.2608 Contig0002	NZ_AEZS02000001..NZ_AEZS02000022	17	ST20 Cplx	Refseq
Escherichia coli 3.3884 Contig1	NZ_AFAC02000001..NZ_AFAC02000013	58	ST155 Cplx	Refseq
Escherichia coli 3.4870 genomic scaffold gec34870.contig.493	NZ_JH970613..NZ_JH970970	11	ST11 Cplx	Refseq
Escherichia coli 3.4880 gec34880.contig.171_1	NZ_AOET01000001..NZ_AOET01000167	NT	-	Refseq
Escherichia coli 3003 ctg1125870511195	NZ_AFAF02000001..NZ_AFAF02000008	725	-	Refseq
Escherichia coli 3006 genomic scaffold E3006.contig.346	NZ_JH953706..NZ_JH954000	5502	-	Refseq
Escherichia coli 3030-1	NZ_AFDT01000001..NZ_AFDT01000090	154	-	Refseq
Escherichia coli 3431 gec3431.assembly.9	NZ_ADUM01000001..NZ_ADUM01000127	378	ST10 Cplx	Refseq
Escherichia coli 4.0522 ctg1125528701409	NZ_AEZU02000001..NZ_AEZU02000109	16	ST29 Cplx	Refseq
Escherichia coli 4.0967 Contig0013	NZ_AFAA02000001..NZ_AFAA02000041	20	ST20 Cplx	Refseq
Escherichia coli 4_1_47FAA genomic scaffold supercont1.43	NZ_JH594553..NZ_JH594595	NT	-	Refseq
Escherichia coli 5.0588 Contig0002	NZ_AEZK02000001..NZ_AEZK02000031	2385	-	Refseq
Escherichia coli 5.0959 Contig0003	NZ_AEZX02000001..NZ_AEZX02000029	655	-	Refseq
Escherichia coli 5.2239 genomic scaffold gec52239.contig.484	NZ_JH970971..NZ_JH971384	11	ST11 Cplx	Refseq
Escherichia coli 536	NC_008253	127	-	Refseq
Escherichia coli 53638 gcontig_1105238512149	NZ_AAKB02000001..NZ_AAKB02000002	6	-	Refseq
Escherichia coli 541-1 contig00444	NZ_AJWR01000001..NZ_AJWR01000383	603	-	Refseq
Escherichia coli 541-15 contig00418	NZ_AJWQ01000001..NZ_AJWQ01000301	401	-	Refseq
Escherichia coli 5412 genomic scaffold E5412.contig.473	NZ_JH954602..NZ_JH954974	11	ST11 Cplx	Refseq
Escherichia coli 55989	NC_011748	678	-	Refseq
Escherichia coli 576-1 contig00618	NZ_AJWS01000001..NZ_AJWS01000507	NT	-	Refseq
Escherichia coli 5905 genomic scaffold E5905.contig.407	NZ_JH958332..NZ_JH958682	335	ST11 Cplx	Refseq
Escherichia coli 6.0172 genomic scaffold gec60172.contig.481	NZ_JH970109..NZ_JH970488	11	ST11 Cplx	Refseq
Escherichia coli 7.1982 gec71982.contig.143_1	NZ_AOEP01000001..NZ_AOEP01000141	11	ST11 Cplx	Refseq
Escherichia coli 75 contig00338	NZ_AJWT01000001..NZ_AJWT01000254	10	ST10 Cplx	Refseq
Escherichia coli 8.0416 80416_CA.contig.245	NZ_AMTN01000001..NZ_AMTN01000245	11	ST11 Cplx	Refseq
Escherichia coli 8.0566 genomic scaffold gec80566.contig.183	NZ_JH970489..NZ_JH970612	10	ST10 Cplx	Refseq
Escherichia coli 8.0569 genomic scaffold gec80569.contig.153	NZ_JH969509..NZ_JH969624	10	ST10 Cplx	Refseq
Escherichia coli 8.0586 genomic scaffold gec80586.contig.750	NZ_JH969625..NZ_JH970108	11	ST11 Cplx	Refseq
Escherichia coli 8.2524 genomic scaffold gec82524.contig.495	NZ_JH968734..NZ_JH969092	11	ST11 Cplx	Refseq
Escherichia coli 83972 genomic scaffold SCAFFOLD105	NZ_GG669095..NZ_GG669199	73	ST73 Cplx	Refseq
[truncated: 691 more rows]
