# Supplementary material for: Identification of Novel Biomarkers for Priority Serotypes of Shiga Toxin-Producing Escherichia coli and the Development of Multiplex PCR for Their Detection
Source: Front Microbiol. 2018 Jun 26;9:1321. doi: 10.3389/fmicb.2018.01321 (PMC6028524; doi:10.3389/fmicb.2018.01321)
Supplement: TABLE S3 — Results primer BlastN against enterobacterial genomes. [file Table_3.XLSX]

## Sheet: nt-collection
		primer name	MK_CC11_2	MK_O104_3	MK_O111_3	MK_O26_1	MK_O45_2	MK_O121_5	MK_CC20_1	MK_ST306_5	MK_O103_2	MK_CC29_1	MK_ST32_1	MK_ST678_4	MK_O145_3	stx1	stx2	eae	uidA
Genus	# Genomes in DB ~	Protein_ID	TW14359_00298	C895_12_04427	STEC_4-0522_03316	97-3250_02669	DEC11C_02459	STEC_5-0959_03396	DC22_RS13770	Uli3841_01786	CVM9340_04521	STEC_4-0522_00782	4865_96_01251	C895_12_05719	2012C-4477_02057
Shigella	1453		-	-	-	-	-	2 hits (99/100)	-	-	-	-	-	27 hits (95/100)	-	21 hits (100/100)	1 hit (100/20)	3 hits (93/74)	over 100 hits
Citrobacter	196		-	-	-	-	-	-	-	-	-	7 hits (81/100)	-	-	-	-	1 hit (97/98)	3 hits (88/70)	-
Yersinia	755		-	-	-	-	-	-	-	-	-	-	-	-	-	-	-	-	-
Salmonella	8141		1 hit (99/100)	-	1 hit (85/99)	-	-	-	-	-	-	3 hits (81/100)	-	1 hit (97/100)	-	-	-	-	-
Proteus	94		-	-	-	-	-	-	-	-	-	-	-	-	-	-	-	-	-
Serratia	468		-	-	3 hits (77/22)	-	-	-	-	-	-	-	-	-	-	-	-	-	-
Enterobacter	1317		-	-	-	-	5 hits (97/100)	-	1 hit (98/100)	-	-	9 hits (79/100)	-	-	-	2 hits (86/100)	1 hit (99/100)	-	-
Klebsiella	4383		-	-	1 hit (74/23)	-	-	-	-	-	-	2 hits (79/100)	-	-	-	-	-	-	-
Blast against the Nucleotide collection (nt)
hit (% identity / % coverage)
Description:The nucleotide collection consists of GenBank+EMBL+DDBJ+PDB+RefSeq sequences, but excludes EST, STS, GSS, WGS, TSA, patent sequences as well as phase 0, 1, and 2 HTGS sequences. The database is non-redundant. Identical sequences have been merged into one entry, while preserving the accession, GI, title and taxonomy information for each entry.
Molecule Type:mixed DNA
Update date:2018/04/09
downloaded the top hit for each blast result and run primersearch
		primer name	MK_CC11_2	MK_O104_3	MK_O111_3	MK_O26_1	MK_O45_2	MK_O121_5	MK_CC20_1	MK_ST306_5	MK_O103_2	MK_CC29_1	MK_ST32_1	MK_ST678_4	MK_O145_3	stx1	stx2	eae	uidA
Genus	# genomes downloaded	Protein_ID	TW14359_00298	C895_12_04427	STEC_4-0522_03316	97-3250_02669	DEC11C_02459	STEC_5-0959_03396	DC22_RS13770	Uli3841_01786	CVM9340_04521	STEC_4-0522_00782	4865_96_01251	C895_12_05719	2012C-4477_02057
Shigella	14		-	-	-	-	-	1 hit (correct) (strain ATCC_9752 is O121) (cge)	-	-	1 hit (correct) (strain ECSW is serotype O103 (cge))	-	-	no primer hit	-	1 hit (correct)	-	1 hit (correct)	2 hits (correct)
Citrobacter	6		-	-	-	-	-	-	-	-	-	no primer hit	-	-	-	-	no primer hit	no primer hit	-
Yersinia	0		-	-	-	-	-	-	-	-	-	-	-	-	-	-	-	-	-
Salmonella	8		1 hit (99/100)	-	no primer hit	-	-	-	-	-	-	no primer hit	-	no primer hit	-	-	-	-	-
Proteus	0		-	-	-	-	-	-	-	-	-	-	-	-	-	-	-	-	-
Serratia	2		-	-	no primer hit	-	-	-	-	-	-	-	-	-	-	-	-	-	-
Enterobacter	10		-	-	-	-	no primer hit	-	1 hit (correct)	-	-	no primer hit	-	-	-	no primer hit	1 hit (correct)	-	-
Klebsiella	4		-	-	no primer hit	-	-	-	-	-	-	no primer hit	-	-	-	-	-	-	-

## Sheet: Refseq_genomes
	primer name	MK_ST11_2	MK_O104_3	MK_O111_3	MK_O26_1	MK_O45_2	MK_O121_5	MK_ST20_1	MK_ST306_5	MK_O103_2	MK_CC29_1	MK_ST32_1	MK_ST678_4	MK_O145_3
Organism	Protein_ID	TW14359_00298	C895_12_04427	STEC_4-0522_03316	97-3250_02669	DEC11C_02459	STEC_5-0959_03396	DC22_RS13770	Uli3841_01786	CVM9340_04521	STEC_4-0522_00782	4865_96_01251	C895_12_05719	2012C-4477_02057
Shigella		-	-	-	-	-	-	-	2 hits (78/85)	2 hits (99/100)	-	-	28 hits (95/100)	-
Citrobacter		1 hit (97/100)	-	-	-	-	-	-	-	-	16 hits (81/100)	1 hit (80/99)	-	2 hits (91/100)
