# Supplementary material for: Identification of Novel Biomarkers for Priority Serotypes of Shiga Toxin-Producing Escherichia coli and the Development of Multiplex PCR for Their Detection
Source: Front Microbiol. 2018 Jun 26;9:1321. doi: 10.3389/fmicb.2018.01321 (PMC6028524; doi:10.3389/fmicb.2018.01321)
Supplement: TABLE S4 — stx primer specificity test. [file Table_4.XLSX]

## Sheet: stx1_alleles
stx1	stx1 acc-no	stx1 allele	detected by stx1 primer	stx1 primer detection comments
stx1:1	M24352	S.dysenteriae cytotoxin	yes	both primers bind with 0 mismatches and correct amplimer length
stx1:3	M19437	Stx-S-dysenteriae-3818T	yes	both primers bind with 0 mismatches and correct amplimer length
stx1:4	L04539	stx1a	yes	both primers bind with 0 mismatches and correct amplimer length
stx1:5	Z36900	stx1a	yes	both primers bind with 0 mismatches and correct amplimer length
stx1:6	AB083044	stx1a	yes	both primers bind with 0 mismatches and correct amplimer length
stx1:7	AB035142	stx1a	yes	both primers bind with 0 mismatches and correct amplimer length
stx1:8	AM230663	stx1a	yes	both primers bind with 0 mismatches and correct amplimer length
stx1:9	AM230662	stx1a	yes	both primers bind with 0 mismatches and correct amplimer length
stx1:10	AJ279086	Shigella sonnei bacteriophage 7888	yes	both primers bind with 0 mismatches and correct amplimer length
stx1:11	Z36899	stx1a	yes	both primers bind with 0 mismatches and correct amplimer length
stx1:12	AF461168	stx1a	yes	both primers bind with 0 mismatches and correct amplimer length
stx1:13	M19473	stx1a	yes	both primers bind with 0 mismatches and correct amplimer length
stx1:14	AB048232	stx1a	yes	both primers bind with 0 mismatches and correct amplimer length
stx1:15	AB071620	stx1c	yes	both primers bind with 0 mismatches and correct amplimer length
stx1:16	AB048237	stx1c	yes	both primers bind with 0 mismatches and correct amplimer length
stx1:17	AB071622	stx1c	yes	both primers bind with 0 mismatches and correct amplimer length
stx1:18	AB071624	stx1c	yes	both primers bind with 0 mismatches and correct amplimer length
stx1:19	DQ449666	stx1c	yes	both primers bind with 0 mismatches and correct amplimer length
stx1:20	Z36901	stx1c	yes	both primers bind with 0 mismatches and correct amplimer length
stx1:21	AB050958	stx1d	yes	both primers bind with 0 mismatches and correct amplimer length
stx1:22	AB050959	stx1d	yes	both primers bind with 0 mismatches and correct amplimer length
stx1:23	AY986980	stx1d	yes	both primers bind with 0 mismatches and correct amplimer length
stx1:24	AY170851	stx1d	yes	both primers bind with 0 mismatches and correct amplimer length

## Sheet: stx2_alleles
stx2	stx2 acc-no	stx2 allele	detected by stx2 primer	stx2 primer detection comments	used for primer design	correctly identified in PCR in HUSEC collection
stx2:15	AF524944	stx2a	yes	both primers bind with 0 mismatches and correct amplimer length	yes	yes
stx2:17	FM998858	stx2a	yes	both primers bind with 0 mismatches and correct amplimer length	yes	yes
stx2:24	AB030484	stx2a	yes	both primers bind with 0 mismatches and correct amplimer length	yes	yes
stx2:31	X07865	stx2a	yes	both primers bind with 0 mismatches and correct amplimer length	yes	yes
stx2:92	AF043627	stx2b	yes (10% missmatch)	ATGGGTACTGTGCCTGTTACTG hits forward strand at 21 with 0 mismatches TATTCTCCCCACTCTGACACCA hits reverse strand at [502] with 1 mismatches Amplimer length: 715 bp	yes	yes
stx2:52	AB015057	stx2c	yes	both primers bind with 0 mismatches and correct amplimer length	yes	yes
stx2:67	AF500190	stx2d	yes	both primers bind with 0 mismatches and correct amplimer length	yes	yes
stx2:78	DQ059012	stx2d	yes	both primers bind with 0 mismatches and correct amplimer length	yes	yes
stx2:32	EF441618	stx2a	yes	both primers bind with 0 mismatches and correct amplimer length		yes
stx2:41	AM982821	stx2c	yes	both primers bind with 0 mismatches and correct amplimer length		yes
stx2:61	AY633458	stx2d	yes	both primers bind with 0 mismatches and correct amplimer length		yes
stx2:66	FM99884	stx2d	yes	both primers bind with 0 mismatches and correct amplimer length		yes
stx2:1	FM998851	stx2a	yes	both primers bind with 0 mismatches and correct amplimer length	yes
stx2:10	Z37725	stx2a	yes	both primers bind with 0 mismatches and correct amplimer length	yes
stx2:11	FM998842	stx2a	yes	both primers bind with 0 mismatches and correct amplimer length	yes
stx2:18	EF441619	stx2a	yes	both primers bind with 0 mismatches and correct amplimer length	yes
stx2:19	AY633459	stx2a	yes	both primers bind with 0 mismatches and correct amplimer length	yes
stx2:20	GQ429170	stx2a	yes	both primers bind with 0 mismatches and correct amplimer length	yes
stx2:9	FM998839	stx2a	yes	both primers bind with 0 mismatches and correct amplimer length	yes
stx2:91	AJ313015	stx2b	yes (10% missmatch)	ATGGGTACTGTGCCTGTTACTG hits forward strand at 21 with 0 mismatches TATTCTCCCCACTCTGACACCA hits reverse strand at [502] with 1 mismatches Amplimer length: 715 bp	yes
stx2:93	AJ567997	stx2b	yes (10% missmatch)	ATGGGTACTGTGCCTGTTACTG hits forward strand at 21 with 0 mismatches TATTCTCCCCACTCTGACACCA hits reverse strand at [502] with 1 mismatches Amplimer length: 715 bp	yes
stx2:33	EF441604	stx2c	yes	both primers bind with 0 mismatches and correct amplimer length	yes
stx2:35	L11079	stx2c	yes	both primers bind with 0 mismatches and correct amplimer length	yes
stx2:36	M59432	stx2c	yes	both primers bind with 0 mismatches and correct amplimer length	yes
stx2:43	AY633473	stx2c	yes	both primers bind with 0 mismatches and correct amplimer length	yes
stx2:44	AY633453	stx2c	yes	both primers bind with 0 mismatches and correct amplimer length	yes
stx2:45	AY633467	stx2c	yes	both primers bind with 0 mismatches and correct amplimer length	yes
stx2:46	AY633469	stx2c	yes	both primers bind with 0 mismatches and correct amplimer length	yes
stx2:51	AF291819	stx2c	yes	both primers bind with 0 mismatches and correct amplimer length	yes
stx2:58	AF479828	stx2d	yes	both primers bind with 0 mismatches and correct amplimer length	yes
stx2:71	EU816447	stx2d	yes	both primers bind with 0 mismatches and correct amplimer length	yes
stx2:72	X61283	stx2d	yes	both primers bind with 0 mismatches and correct amplimer length	yes
stx2:74	EF584538	stx2d	yes	both primers bind with 0 mismatches and correct amplimer length	yes
stx2:119	AY332411	stx2e	yes (15% missmatch)	ATGGGTACTGTGCCTGTTACTG hits forward strand at 21 with 3 mismatches TATTCTCCCCACTCTGACACCA hits reverse strand at [509] with 0 mismatches Amplimer length: 715 bp	yes
stx2:120	AJ567998	stx2e	yes (10% missmatch)	ATGGGTACTGTGCCTGTTACTG hits forward strand at 21 with 2 mismatches TATTCTCCCCACTCTGACACCA hits reverse strand at [509] with 0 mismatches Amplimer length: 715 bp	yes
stx2:104	AJ010730	stx2f	no		yes
stx2:99	AB048227	stx2g	yes	both primers bind with 0 mismatches and correct amplimer length	yes
stx2:12	Z50754	stx2a	yes	both primers bind with 0 mismatches and correct amplimer length
stx2:13	AY443052	stx2a	yes	both primers bind with 0 mismatches and correct amplimer length
stx2:14	AJ272135	stx2a	yes	both primers bind with 0 mismatches and correct amplimer length
stx2:16	FM998856	stx2a	yes	both primers bind with 0 mismatches and correct amplimer length
stx2:2	AY443054	stx2a	yes	both primers bind with 0 mismatches and correct amplimer length
stx2:21	AF461171	stx2a	yes	both primers bind with 0 mismatches and correct amplimer length
stx2:22	AY443057	stx2a	yes	both primers bind with 0 mismatches and correct amplimer length
stx2:23	AF461173	stx2a	yes	both primers bind with 0 mismatches and correct amplimer length
stx2:25	AY633472	stx2a	yes	both primers bind with 0 mismatches and correct amplimer length
stx2:26	EF441613	stx2a	yes	both primers bind with 0 mismatches and correct amplimer length
stx2:27	AY633471	stx2a	yes	both primers bind with 0 mismatches and correct amplimer length
stx2:28	DQ344636	stx2a	yes	both primers bind with 0 mismatches and correct amplimer length
stx2:29	EF441609	stx2a	yes	both primers bind with 0 mismatches and correct amplimer length
stx2:3	GQ429162	stx2a	yes	both primers bind with 0 mismatches and correct amplimer length
stx2:30	EF441599	stx2a	yes	both primers bind with 0 mismatches and correct amplimer length
stx2:4	FM998852	stx2a	yes	both primers bind with 0 mismatches and correct amplimer length
stx2:5	GQ429163	stx2a	yes	both primers bind with 0 mismatches and correct amplimer length
stx2:6	GQ429168	stx2a	yes	both primers bind with 0 mismatches and correct amplimer length
stx2:7	FM998854	stx2a	yes	both primers bind with 0 mismatches and correct amplimer length
stx2:8	FM998861	stx2a	yes	both primers bind with 0 mismatches and correct amplimer length
stx2:82	AB012102	stx2b	yes (15% missmatch)	ATGGGTACTGTGCCTGTTACTG hits forward strand at 21 with 0 mismatches TATTCTCCCCACTCTGACACCA hits reverse strand at [508] with 3 mismatches Amplimer length: 715 bp
stx2:83	AB048228	stx2b	yes (10% missmatch)	ATGGGTACTGTGCCTGTTACTG hits forward strand at 21 with 0 mismatches TATTCTCCCCACTCTGACACCA hits reverse strand at [508] with 1 mismatches Amplimer length: 715 bp
stx2:84	AB048238	stx2b	yes (10% missmatch)	ATGGGTACTGTGCCTGTTACTG hits forward strand at 21 with 0 mismatches TATTCTCCCCACTCTGACACCA hits reverse strand at [508] with 1 mismatches Amplimer length: 715 bp
stx2:85	AB048224	stx2b	yes (10% missmatch)	ATGGGTACTGTGCCTGTTACTG hits forward strand at 21 with 0 mismatches TATTCTCCCCACTCTGACACCA hits reverse strand at [508] with 1 mismatches Amplimer length: 715 bp
stx2:86	AB048223	stx2b	yes (10% missmatch)	ATGGGTACTGTGCCTGTTACTG hits forward strand at 21 with 2 mismatches TATTCTCCCCACTCTGACACCA hits reverse strand at [508] with 1 mismatches Amplimer length: 715 bp
stx2:87	AB048229	stx2b	yes (10% missmatch)	ATGGGTACTGTGCCTGTTACTG hits forward strand at 21 with 2 mismatches TATTCTCCCCACTCTGACACCA hits reverse strand at [508] with 1 mismatches Amplimer length: 715 bp
stx2:88	AB012101	stx2b	yes (10% missmatch)	ATGGGTACTGTGCCTGTTACTG hits forward strand at 21 with 2 mismatches TATTCTCCCCACTCTGACACCA hits reverse strand at [508] with 1 mismatches Amplimer length: 715 bp
stx2:89	AB048226	stx2b	yes (10% missmatch)	ATGGGTACTGTGCCTGTTACTG hits forward strand at 21 with 2 mismatches TATTCTCCCCACTCTGACACCA hits reverse strand at [508] with 1 mismatches Amplimer length: 715 bp
stx2:90	AB048225	stx2b	yes (10% missmatch)	ATGGGTACTGTGCCTGTTACTG hits forward strand at 21 with 2 mismatches TATTCTCCCCACTCTGACACCA hits reverse strand at [508] with 1 mismatches Amplimer length: 715 bp
stx2:94	EF441616	stx2b	yes (10% missmatch)	ATGGGTACTGTGCCTGTTACTG hits forward strand at 21 with 0 mismatches TATTCTCCCCACTCTGACACCA hits reverse strand at [508] with 1 mismatches Amplimer length: 715 bp
stx2:95	AJ567995	stx2b	yes (10% missmatch)	ATGGGTACTGTGCCTGTTACTG hits forward strand at 21 with 0 mismatches TATTCTCCCCACTCTGACACCA hits reverse strand at [509] with 1 mismatches Amplimer length: 715 bp
stx2:96	L11078	stx2b	yes (10% missmatch)	ATGGGTACTGTGCCTGTTACTG hits forward strand at 21 with 0 mismatches TATTCTCCCCACTCTGACACCA hits reverse strand at [502] with 2 mismatches Amplimer length: 715 bp
stx2:97	X65949	stx2b	yes (10% missmatch)	ATGGGTACTGTGCCTGTTACTG hits forward strand at 21 with 0 mismatches TATTCTCCCCACTCTGACACCA hits reverse strand at [502] with 2 mismatches Amplimer length: 715 bp
stx2:34	AY443044	stx2c	yes (10% missmatch)	ATGGGTACTGTGCCTGTTACTG hits forward strand at 21 with 1 mismatches TATTCTCCCCACTCTGACACCA hits reverse strand at [507] with 2 mismatches Amplimer length: 715 bp
stx2:37	FM177471	stx2c	yes	both primers bind with 0 mismatches and correct amplimer length
stx2:39	AY443043	stx2c	yes (10% missmatch)	ATGGGTACTGTGCCTGTTACTG hits forward strand at 21 with 0 mismatches TATTCTCCCCACTCTGACACCA hits reverse strand at [507] with 1 mismatches Amplimer length: 715 bp
stx2:40	EU086525	stx2c	yes	both primers bind with 0 mismatches and correct amplimer length
stx2:42	AY633464	stx2c	yes	both primers bind with 0 mismatches and correct amplimer length
stx2:47	AY739671	stx2c	yes	both primers bind with 0 mismatches and correct amplimer length
stx2:48	DQ235774	stx2c	yes	both primers bind with 0 mismatches and correct amplimer length
stx2:49	AB071845	stx2c	yes	both primers bind with 0 mismatches and correct amplimer length
stx2:50	AF461167	stx2c	yes	both primers bind with 0 mismatches and correct amplimer length
stx2:53	AY443045	stx2c	yes	both primers bind with 0 mismatches and correct amplimer length
stx2:55	AY443049	stx2c	yes	both primers bind with 0 mismatches and correct amplimer length
stx2:56	FM998860	stx2c	yes	both primers bind with 0 mismatches and correct amplimer length
stx2:70	AY739671	stx2c	yes (10% missmatch)	ATGGGTACTGTGCCTGTTACTG hits forward strand at 21 with 2 mismatches TATTCTCCCCACTCTGACACCA hits reverse strand at [507] with 0 mismatches Amplimer length: 718 bp
stx2:54	AY633470	stx2c/d (unknown)	yes	both primers bind with 0 mismatches and correct amplimer length
stx2:38	AF500189	stx2d	yes	both primers bind with 0 mismatches and correct amplimer length
stx2:57	AY443047	stx2d	yes	both primers bind with 0 mismatches and correct amplimer length
stx2:59	GQ429172	stx2d	yes	both primers bind with 0 mismatches and correct amplimer length
stx2:60	AY633457	stx2d	yes	both primers bind with 0 mismatches and correct amplimer length
stx2:62	AY443048	stx2d	yes	both primers bind with 0 mismatches and correct amplimer length
stx2:63	FM998848	stx2d	yes	both primers bind with 0 mismatches and correct amplimer length
stx2:64	AF500191	stx2d	yes	both primers bind with 0 mismatches and correct amplimer length
stx2:65	EF441621	stx2d	yes	both primers bind with 0 mismatches and correct amplimer length
stx2:68	DQ235775	stx2d	yes	both primers bind with 0 mismatches and correct amplimer length
stx2:69	AF479829	stx2d	yes	both primers bind with 0 mismatches and correct amplimer length
stx2:73	EF441605	stx2d	yes	both primers bind with 0 mismatches and correct amplimer length
stx2:75	AF329817	stx2d	yes	both primers bind with 0 mismatches and correct amplimer length
stx2:76	AF500192	stx2d	yes	both primers bind with 0 mismatches and correct amplimer length
stx2:77	AY095209	stx2d	yes	both primers bind with 0 mismatches and correct amplimer length
stx2:79	SNS	stx2d	yes	both primers bind with 0 mismatches and correct amplimer length
stx2:80	FN182287	stx2d	yes	both primers bind with 0 mismatches and correct amplimer length
stx2:81	FM998855	stx2d	yes	both primers bind with 0 mismatches and correct amplimer length
stx2:106	X81418	stx2e	yes (10% missmatch)	ATGGGTACTGTGCCTGTTACTG hits forward strand at 21 with 2 mismatches TATTCTCCCCACTCTGACACCA hits reverse strand at [502] with 0 mismatches Amplimer length: 715 bp
stx2:107	AJ313016	stx2e	yes (10% missmatch)	ATGGGTACTGTGCCTGTTACTG hits forward strand at 21 with 2 mismatches TATTCTCCCCACTCTGACACCA hits reverse strand at [502] with 0 mismatches Amplimer length: 715 bp
stx2:108	FM998844	stx2e	yes (15% missmatch)	ATGGGTACTGTGCCTGTTACTG hits forward strand at 21 with 3 mismatches TATTCTCCCCACTCTGACACCA hits reverse strand at [502] with 0 mismatches Amplimer length: 715 bp
stx2:109	U72191	stx2e	yes (15% missmatch)	ATGGGTACTGTGCCTGTTACTG hits forward strand at 21 with 3 mismatches TATTCTCCCCACTCTGACACCA hits reverse strand at [502] with 0 mismatches Amplimer length: 715 bp
stx2:110	M21534	stx2e	yes (15% missmatch)	ATGGGTACTGTGCCTGTTACTG hits forward strand at 21 with 3 mismatches TATTCTCCCCACTCTGACACCA hits reverse strand at [502] with 0 mismatches Amplimer length: 715 bp
stx2:111	X81417	stx2e	yes (15% missmatch)	ATGGGTACTGTGCCTGTTACTG hits forward strand at 21 with 3 mismatches TATTCTCCCCACTCTGACACCA hits reverse strand at [502] with 0 mismatches Amplimer length: 715 bp
stx2:112	X81415	stx2e	yes (10% missmatch)	ATGGGTACTGTGCCTGTTACTG hits forward strand at 21 with 2 mismatches TATTCTCCCCACTCTGACACCA hits reverse strand at [502] with 0 mismatches Amplimer length: 715 bp
stx2:113	X81416	stx2e	yes (10% missmatch)	ATGGGTACTGTGCCTGTTACTG hits forward strand at 21 with 2 mismatches TATTCTCCCCACTCTGACACCA hits reverse strand at [502] with 0 mismatches Amplimer length: 715 bp
stx2:114	FN182286	stx2e	yes (10% missmatch)	ATGGGTACTGTGCCTGTTACTG hits forward strand at 21 with 2 mismatches TATTCTCCCCACTCTGACACCA hits reverse strand at [502] with 0 mismatches Amplimer length: 715 bp
stx2:115	FM998846	stx2e	yes (10% missmatch)	ATGGGTACTGTGCCTGTTACTG hits forward strand at 21 with 2 mismatches TATTCTCCCCACTCTGACACCA hits reverse strand at [502] with 0 mismatches Amplimer length: 715 bp
stx2:116	AY368993	stx2e	yes (15% missmatch)	ATGGGTACTGTGCCTGTTACTG hits forward strand at 21 with 3 mismatches TATTCTCCCCACTCTGACACCA hits reverse strand at [502] with 0 mismatches Amplimer length: 715 bp
stx2:117	AM939642	stx2e	yes (10% missmatch)	ATGGGTACTGTGCCTGTTACTG hits forward strand at 21 with 2 mismatches TATTCTCCCCACTCTGACACCA hits reverse strand at [509] with 0 mismatches Amplimer length: 715 bp
stx2:118	FM998838	stx2e	yes (10% missmatch)	ATGGGTACTGTGCCTGTTACTG hits forward strand at 21 with 2 mismatches TATTCTCCCCACTCTGACACCA hits reverse strand at [501] with 0 mismatches Amplimer length: 715 bp
stx2:121	AJ249351	stx2e	yes (10% missmatch)	ATGGGTACTGTGCCTGTTACTG hits forward strand at 21 with 2 mismatches TATTCTCCCCACTCTGACACCA hits reverse strand at [502] with 0 mismatches Amplimer length: 715 bp
stx2:98	AM904726	stx2e	yes (10% missmatch)	ATGGGTACTGTGCCTGTTACTG hits forward strand at 21 with 2 mismatches TATTCTCCCCACTCTGACACCA hits reverse strand at [507] with 0 mismatches Amplimer length: 715 bp
stx2:103	AB472687	stx2f	no
stx2:105	M29153	stx2f	no
stx2:100	AY286000	stx2g	yes (10% missmatch)	ATGGGTACTGTGCCTGTTACTG hits forward strand at 21 with 0 mismatches TATTCTCCCCACTCTGACACCA hits reverse strand at [508] with 1 mismatches Amplimer length: 715 bp
stx2:101	AB048236	stx2g	yes (10% missmatch)	ATGGGTACTGTGCCTGTTACTG hits forward strand at 21 with 0 mismatches TATTCTCCCCACTCTGACACCA hits reverse strand at [508] with 1 mismatches Amplimer length: 715 bp
stx2:102	AJ966783	stx2g	yes (10% missmatch)	ATGGGTACTGTGCCTGTTACTG hits forward strand at 21 with 0 mismatches TATTCTCCCCACTCTGACACCA hits reverse strand at [508] with 1 mismatches Amplimer length: 715 bp
