# Supplementary material for: Identification of Novel Biomarkers for Priority Serotypes of Shiga Toxin-Producing Escherichia coli and the Development of Multiplex PCR for Their Detection
Source: Front Microbiol. 2018 Jun 26;9:1321. doi: 10.3389/fmicb.2018.01321 (PMC6028524; doi:10.3389/fmicb.2018.01321)
Supplement: TABLE S5 — Clinical isolates tested. [file Table_5.XLSX]

## Sheet: S5_in vitro strains
Strain no.	source	Serotype	ST	CC	eae	stx1	stx2	comments
LB326395	clinical isolate	O157:H-	11	ST11 Cplx	+	-	2
LB326550	clinical isolate	O157:H7	11	ST11 Cplx	+	-	2
LB327824	clinical isolate	O157:H7	11	ST11 Cplx	+	-	2
LB329785	clinical isolate	O157:H7	11	ST11 Cplx	+	-	2
LB330513	clinical isolate	O157	11	ST11 Cplx	+	1	2
LB330514	clinical isolate	O157	11	ST11 Cplx	+	1	2
LB330989	clinical isolate	O157:H7	11	ST11 Cplx	+	-	2
LB448197i1	clinical isolate	O157:H7	11	ST11 Cplx	+	-	2a
LB454216i1	clinical isolate	O157:H7	11	ST11 Cplx	+	-	2c
LB280229	clinical isolate	O111:H-	16	ST29 Cplx	+	1	2
LB280735	clinical isolate	O111:H-	16	ST29 Cplx	+	1	2
LB281365	clinical isolate	O111	16	ST29 Cplx	+	1	2
LB366332i2	clinical isolate	O111:H8	16	ST29 Cplx	+	1a	2a
LB367997i1	clinical isolate	O111	16	ST29 Cplx	+	1	-
LB445172i1	clinical isolate	O111:H8	16	ST29 Cplx	+	1a	2a
LB360827	clinical isolate	O103	17	ST20 Cplx	+	1	-
LB361299	clinical isolate	O103	17	ST20 Cplx	+	1	2
LB364014	clinical isolate	O103	17	ST20 Cplx	+	1	-
LB365606	clinical isolate	O103	17	ST20 Cplx	+	1	-
LB365944	clinical isolate	O103	17	ST20 Cplx	+	1	-
LB410981i1	clinical isolate	O103:H2	17	ST20 Cplx	+	1a	-
LB411664i1	clinical isolate	O103:H2	17	ST20 Cplx	+	1a	-
LB235349	clinical isolate	O26:H11	21	ST29 Cplx	+	-	2
LB239764	clinical isolate	O26:H11	21	ST29 Cplx	+	1	-
LB246664	clinical isolate	O26:H11	21	ST29 Cplx	+	1	-
LB451027i1	clinical isolate	O26:H11	21	ST29 Cplx	+	1a	-
LB451533i1	clinical isolate	O26:H11	21	ST29 Cplx	+	1a	-
LB453244i1	clinical isolate	O26:H11	21	ST29 Cplx	+	-	2a
LB234952#2	clinical isolate	O26:H11	29	ST29 Cplx	+	-	2
LB449213i1	clinical isolate	unknown	29	ST29 Cplx	+	-	-
02#02906#1	clinical isolate	O145:H-	32	ST32 Cplx	+	-	2
16#03404	clinical isolate	O145:H-	32	ST32 Cplx	+	-	2a
16#03405	clinical isolate	O145:H-	32	ST32 Cplx	+	-	2a
DN1395#00	clinical isolate	OR:H-	32	ST32 Cplx	+	-	2	positive for O145 primer
LB396941i1	clinical isolate	O145:H28	32	ST32 Cplx	+	-	2
LB413593i1	clinical isolate	Ont:H28	32	ST32 Cplx	+	-	-	positive for O145 primer
LB449195i1	clinical isolate	Ont:Hnt	32	ST32 Cplx	+	-	2a	positive for O145 primer
LB452981i1	clinical isolate	O145:Hnt	32	ST32 Cplx	+	-	2a
LB452981i1	clinical isolate	O145:H-	32	ST32 Cplx	+	-	2a
LB455075i1	clinical isolate	O145:H28	32	ST32 Cplx	+	-	2a
06#05404	clinical isolate	O145:H-	137	ST32 Cplx	+	-	-
LB447918i1	clinical isolate	O145:H28	137	ST32 Cplx	+	-	-
LB322758#1	clinical isolate	O45	301	ST165 Cplx	+	-	2
LB408196i1	clinical isolate	O45:H2	301	ST165 Cplx	+	-	2a
LB410437i1	clinical isolate	O45:H2	301	ST165 Cplx	+	-	2a
LB412761i1	clinical isolate	O45:H2	301	ST165 Cplx	+	-	2a
LB435524i1	clinical isolate	O45:H2	301	ST165 Cplx	+	-	2a
00#09296	clinical isolate	O84:H2	306	n/a	+	1	-
03#00175	clinical isolate	O84:Hnt	306	n/a	+	1	-
03#06145	clinical isolate	O84:H2	306	n/a	+	1	-
05#02869	clinical isolate	O98:H-	306	n/a	+	1	-
05#03519	clinical isolate	O98:H-	306	n/a	-	1	-
7792#96	clinical isolate	OR:H-	306	n/a	+	1	-
7793#96	clinical isolate	O84:H-	306	n/a	+	1	-
CB6116	clinical isolate	O84:H-	306	n/a	+	1	-
LB396382	clinical isolate	unknown	306	n/a	+	1	2
2907#97	clinical isolate	O55:H7	335	ST11 Cplx	+	-	2
DG264#4	clinical isolate	O145:H28	524	ST32 Cplx	+	-	-
LB426455i1	clinical isolate	O103:H4	642	n/a	+	-	-
06#05898	clinical isolate	O121:H19	655	n/a	+	-	2
1274#01	clinical isolate	O121:H19	655	n/a	+	-	-
1529#98	clinical isolate	O121:H19	655	n/a	+	-	2
2763#99	clinical isolate	O121:H19	655	n/a	+	-	2
6316#94	clinical isolate	O121:H19	655	n/a	+	-	-
LB227974#1	clinical isolate	O104	678	n/a	-	-	2
LB227983	clinical isolate	O104	678	n/a	-	-	2
LB227984	clinical isolate	O104	678	n/a	-	-	2
LB228000	clinical isolate	O104	678	n/a	-	-	2
LB228001	clinical isolate	O104	678	n/a	-	-	2
LB228005	clinical isolate	O104	678	n/a	-	-	2
LB228006	clinical isolate	O104	678	n/a	-	-	2
LB228008	clinical isolate	O104	678	n/a	-	-	2
LB228009	clinical isolate	O104	678	n/a	-	-	2
LB228824i1	clinical isolate	Ont	678	n/a	-	-	2
LB234165i1	clinical isolate	O104:H4	678	n/a	-	-	2
LB412622i1	clinical isolate	O104:H4	678	n/a	-	-	2a
CB8971	clinical isolate	O145:H-	1034	ST32 Cplx	+	-	-
LB230349	clinical isolate	O157:H-	3064	ST11 Cplx	+	1	2
LB281992	clinical isolate	O111	3294	n/a	+	1	2	positive for CC29 primer (neighbor to ST29 Cplx)
LB281993	clinical isolate	O111	3294	n/a	+	1	2	positive for CC29 primer (neighbor to ST29 Cplx)
LB333025	clinical isolate	unknown	4119	ST28 Cplx	+	-	-
LB456070i1	clinical isolate	O145:H28	6130	n/a	+	-	2a
LB241603	clinical isolate	O26	unknown	ST29 Cplx	+	-	-
K12 MG1655	control strain	O16:H48	10	ST10 Cplx	-	-	-
55989	control strain	O104:H4	678	n/a	+	-	-
05-946	HUSEC001	O111:H10	43	ST10 Cplx	-	-	2
5152/97	HUSEC002	Ont:H-	330	ST10 Cplx	+	-	2
6334/96	HUSEC003	O157:H7	11	ST11 Cplx	+	-	2
3072/96	HUSEC004	O157:H-	11	ST11 Cplx	+	-	2
2907/97	HUSEC005	O55:H7	335	ST11 Cplx	+	-	2
5376/99	HUSEC006	O157:H-	587	ST11 Cplx	+	-	2
7382/96	HUSEC007	O103:H2	17	ST20 Cplx	+	-	2
2791/97	HUSEC008	O103:H-	17	ST20 Cplx	+	-	2
6833/96	HUSEC009	OR:H2	17	ST20 Cplx	+	-	2	positive for O103 primer
1805/00	HUSEC010	O119:H2	20	ST20 Cplx	+	1	-
2516/00	HUSEC011	O111:H8	16	ST29 Cplx	+	1	2
6037/96	HUSEC012	O111:H-	16	ST29 Cplx	+	1	2
2245/98	HUSEC013	O26:H11	21	ST29 Cplx	+	1	-
5080/97	HUSEC014	O26:H-	21	ST29 Cplx	+	1	2
126814/98	HUSEC015	OR:H11	21	ST29 Cplx	+	-	2	positive for O26 primer
5028/97	HUSEC016	Ont:Hnt	21	ST29 Cplx	+	1	-
3319/99	HUSEC017	O26:H11	21	ST29 Cplx	+	1	2
1530/99	HUSEC018	O26:H11	29	ST29 Cplx	+	-	2
1588/98	HUSEC019	OR:H11	29	ST29 Cplx	+	1	-
3271/00	HUSEC020	O26:H11	396	ST29 Cplx	+	-	2
0488/99	HUSEC021	O145:H28	32	ST32 Cplx	+	-	2
4557/99	HUSEC022	O145:H-	137	ST32 Cplx	+	-	2
1169/97/1	HUSEC023	O112:H-	40	ST40 Cplx	-	-	2d
2996/96	HUSEC024	O73:H18	69	ST69 Cplx	-	-	2d
06-05009	HUSEC025	O55:Hnt	101	ST101 Cplx	-	1	-
99-09355	HUSEC026	O113:H21	56	ST155 Cplx	-	-	2d
03-07727	HUSEC027	O163:H19	679	n/a	-	-	2d
03-06687	HUSEC028	O128:H2	25	n/a	-	1c	2d
4256/99	HUSEC029	O70:H8	39	n/a	+	-	2
05-03519	HUSEC030	O98:H-	306	n/a	-	1	-
7792/96	HUSEC031	OR:H-	306	n/a	+	1	-
2441/98	HUSEC032	O136:Hnt	329	n/a	-	1c	2
4392/97	HUSEC033	O145:H25	342	n/a	+	-	2
3332/99	HUSEC034	O91:H21	442	n/a	-	1	2+2d
1529/98	HUSEC035	O121:H19	655	n/a	+	-	2
2839/98	HUSEC036	O177:H25	659	n/a	+	-	2c
02-03885	HUSEC037	O104:H21	672	n/a	-	1	2+2d
3356/97B	HUSEC038	Ont:H21	672	n/a	-	1	2d	positive for O104 primer
3651/96	HUSEC039	O76:H19	675	n/a	-	1c	-
220/00	HUSEC040	O174:H21	677	n/a	-	-	2c
01-09591	HUSEC041	O104:H4	678	n/a	-	-	2
820/08	HUSEC042	O165:H25	119	n/a	+	-	2+2c
