# Supplementary material for: Identification of Novel Biomarkers for Priority Serotypes of Shiga Toxin-Producing Escherichia coli and the Development of Multiplex PCR for Their Detection
Source: Front Microbiol. 2018 Jun 26;9:1321. doi: 10.3389/fmicb.2018.01321 (PMC6028524; doi:10.3389/fmicb.2018.01321)
Supplement: TABLE S7 — CC11 and CC20 markers detected by pipeline A+B. [file Table_7.XLSX]

## Sheet: S7_proteins pipeline A+B
Synonym	Biomarker for group	Used Pipeline	Protein ID of BLAST hit	Product	location [bp]	Length [bp]
ESCCO1_CDS0026	CC11	Pipeline B	WP_001248529.1	hypothetical protein	26923-27543	621
ESCCO1_CDS0027	CC11	Pipeline B	WP_010891291.1	KfrAs	27540-28223	684
ECs0141	CC11	Pipeline B	WP_000770084.1	fimbrial protein	156059-156664	606
TW14359_00136	CC11	Pipeline A	WP_000770084.1	fimbrial protein	156664-156059	606
ECs0279	CC11	Pipeline B	WP_000788869.1	Replication protein P	304317-304628	312
ECs0282	CC11	Pipeline B	WP_000344820.1	tail assembly chaperone	305987-306430	444
ECs0290	CC11	Pipeline B	WP_000082144.1	hypothetical protein	311991-312407	417
ECs0292	CC11	Pipeline B	WP_000251694.1	hypothetical protein	312997-313455	459
ECs0293	CC11	Pipeline B	WP_000999326.1	ATPase AAA	313448-314080	633
ECs0294	CC11	Pipeline B	WP_000647284.1	hypothetical protein	314111-314701	591
TW14359_00298	CC11	Pipeline A	WP_000350115.1	hypothetical protein	314701-315267	567
ECs0295	CC11	Pipeline B	WP_000350115.1	hypothetical protein	314701-315267	567
ECs0297	CC11	Pipeline B	WP_000968317.1	Polarity suppression protein	315955-316506	552
ECs0298	CC11	Pipeline B	WP_000154958.1	septation initiation protein	316503-317255	753
TW14359_00300	CC11	Pipeline A	WP_000968317.1	Polarity suppression protein	316506-315955	552
TW14359_00301	CC11	Pipeline A	WP_000154958.1	septation initiation protein	317255-316503	753
TW14359_00302	CC11	Pipeline A	WP_001244581.1	AlpA family transcriptional regulator	318189-318449	261
ECs0299	CC11	Pipeline B	WP_001244581.1	AlpA family transcriptional regulator	318189-318449	261
ECs0300	CC11	Pipeline B	WP_000973389.1	Ash-like/host cell division inhibitor Icd-like protein	318446-319003	558
TW14359_00305	CC11	Pipeline A	WP_000562750.1	endopeptidase ClpB	319221-319544	324
ECs0302	CC11	Pipeline B	WP_000562750.1	endopeptidase ClpB	319221-319544	324
ECs0304	CC11	Pipeline B	WP_000205213.1	bifunctional 4-hydroxy-2-oxoglutarate aldolase/2-dehydro-3-deoxy-phosphogluconate aldolase	322024-322980	957
TW14359_00307	CC11	Pipeline A	WP_000205213.1	bifunctional 4-hydroxy-2-oxoglutarate aldolase/2-dehydro-3-deoxy-phosphogluconate aldolase	322980-322024	957
TW14359_00309	CC11	Pipeline A	WP_000361969.1	SDR family NAD(P)-dependent oxidoreductase	324654-325376	723
ECs0334	CC11	Pipeline B	WP_001038968.1	hypothetical protein	352241-352597	357
ECs0353	CC11	Pipeline B	WP_001689622.1	hypothetical protein	371104-371271	168
ECs0541	CC11	Pipeline B	WP_000052468.1	Ig-like domain repeat protein	581353-585738	4386
TW14359_00601	CC11	Pipeline A	WP_000658316.1	hypothetical protein	667963-667703	261
TW14359_00683	CC11	Pipeline A	WP_001295352.1	dihydroorotate dehydrogenase (quinone)	757906-757751	156
ECs0711	CC11	Pipeline B	WP_001098571.1	methyl-accepting chemotaxis protein	788359-788838	480
ECs0727	CC11	Pipeline B	WP_001322326.1	K(+)-transporting ATPase subunit F	807159-807248	90
TW14359_00856	CC11	Pipeline A	WP_001303980.1	transposase	928398-928532	135
ECs0906	CC11	Pipeline B	WP_000513757.1	L-asparaginase	990902-991249	348
ECs1110	CC11	Pipeline B	WP_001301534.1	minor capsid protein E	1195696-1195962	267
TW14359_01196	CC11	Pipeline A	AAG55655.1	hypothetical protein Z1540	1348922-1348812	111
ECs1383	CC11	Pipeline B	WP_000598641.1	DNA-binding response regulator	1434621-1435136	516
ECs1886	CC11	Pipeline B	WP_000985273.1	membrane protein	1878032-1878406	375
ECs2006	CC11	Pipeline B	WP_001303278.1	surface-exposed virulence protein BigA	1984119-1987154	3036
TW14359_01863	CC11	Pipeline A	WP_010917810.1	autotransporter domain-containing protein	1987374-1989833	2460
TW14359_01872	CC11	Pipeline A	WP_000086434.1	hypothetical protein	2002939-2003364	426
TW14359_01873	CC11	Pipeline A	WP_000799861.1	hypothetical protein	2003369-2003707	339
TW14359_01874	CC11	Pipeline A	WP_001102905.1	hypothetical protein	2003694-2004125	432
TW14359_01875	CC11	Pipeline A	WP_000344419.1	hypothetical protein	2004250-2004627	378
ECs2075	CC11	Pipeline B	WP_001303498.1	IpaH-like protein	2065679-2066182	504
TW14359_02002	CC11	Pipeline A	WP_001271101.1	rhodanese	2147367-2146972	396
ECs2143	CC11	Pipeline B	WP_000989131.1	transcriptional regulator FtrA	2147459-2148433	975
TW14359_02003	CC11	Pipeline A	WP_000989131.1	transcriptional regulator FtrA	2147462-2148433	972
ECs2646	CC11	Pipeline B	WP_000132765.1	tail protein	2611703-2612026	324
TW14359_02570	CC11	Pipeline A	WP_077891386.1	hypothetical protein	2668147-2668365	219
ECs2715	CC11	Pipeline B	WP_010917831.1	Secreted effector protein EspF(U)	2669551-2670564	1014
ECs2730	CC11	Pipeline B	WP_001301534.1	minor capsid protein E	2683244-2683510	267
ECs2831	CC11	Pipeline B	WP_001055391.1	GDP-perosamine N-acetyltransferase	2773532-2774197	666
ECs2836	CC11	Pipeline B	WP_001278239.1	Mannose-1-phosphate guanylyltransferase 2	2776834-2778282	1449
ECs2837	CC11	Pipeline B	WP_000478513.1	GDP-mannose mannosyl hydrolase	2778264-2778773	510
ECs2838	CC11	Pipeline B	WP_001301811.1	GDP-L-fucose synthase	2778776-2779741	966
ECs2840	CC11	Pipeline B	WP_000684824.1	glycosyl transferase	2780882-2782096	1215
ECs2842	CC11	Pipeline B	WP_001033576.1	O157 family O-antigen flippase	2783218-2784603	1386
ECs2845	CC11	Pipeline B	WP_001031644.1	glycosyl transferase	2786492-2787274	783
TW14359_02890	CC11	Pipeline A	WP_000836936.1	hypothetical protein	2860458-2860805	348
ECs2909	CC11	Pipeline B	WP_000836936.1	hypothetical protein	2860458-2860805	348
TW14359_02891	CC11	Pipeline A	WP_000735648.1	outer membrane protein	2860815-2861129	315
ECs2910	CC11	Pipeline B	WP_000735648.1	outer membrane protein	2860815-2861129	315
ECs2918	CC11	Pipeline B	WP_010904812.1	DUF2574 domain-containing protein	2868246-2868527	282
ECs2921	CC11	Pipeline B	WP_001356387.1	chorismate lyase	2872204-2872932	729
ECs3216	CC11	Pipeline B	WP_001301548.1	DUF2544 domain-containing protein	3175691-3176533	843
TW14359_03199	CC11	Pipeline A	WP_001301548.1	DUF2544 domain-containing protein	3176533-3175691	843
TW14359_03200	CC11	Pipeline A	WP_010917841.1	fimbrial protein	3177056-3176535	522
ECs3235	CC11	Pipeline B	WP_010917842.1	hypothetical protein	3196756-3197043	288
TW14359_03314	CC11	Pipeline A	WP_000119352.1	hypothetical protein	3200085-3198673	1413
TW14359_03315	CC11	Pipeline A	WP_000409798.1	hypothetical protein	3200448-3200272	177
TW14359_03316	CC11	Pipeline A	WP_001102876.1	resolvase	3200751-3201377	627
ECs3251	CC11	Pipeline B	WP_001303610.1	hypothetical protein	3217071-3217301	231
ECs3506	CC11	Pipeline B	WP_010917848.1	lipoprotein	3491224-3491619	396
ECs3509	CC11	Pipeline B	WP_001052051.1	hypothetical protein	3493870-3494268	399
ECs3510	CC11	Pipeline B	WP_001059531.1	DNA-binding protein	3494269-3495900	1632
ECs3624	CC11	Pipeline B	WP_000080709.1	electron transfer flavoprotein subunit alpha	3615037-3615312	276
TW14359_03720	CC11	Pipeline A	WP_000080709.1	electron transfer flavoprotein subunit alpha	3615312-3615037	276
ECs3722	CC11	Pipeline B	WP_001451772.1	hypothetical protein	3723965-3724201	237
TW14359_03824	CC11	Pipeline A	WP_001451772.1	hypothetical protein	3724201-3723965	237
ECs3728	CC11	Pipeline B	WP_000344657.1	hypothetical protein	3727248-3727481	234
TW14359_03834	CC11	Pipeline A	WP_000974434.1	YopN family type III secretion system gatekeeper subunit	3732429-3731284	1146
ECs3783	CC11	Pipeline B	WP_001303648.1	hypothetical protein	3794091-3794321	231
ECs3864	CC11	Pipeline B	WP_010917855.1	hypothetical protein	3870594-3870710	117
ECs3897	CC11	Pipeline B	WP_001304044.1	hypothetical protein	3898007-3898282	276
ECs4187	CC11	Pipeline B	WP_001303697.1	hypothetical protein	4188427-4188612	186
TW14359_04363	CC11	Pipeline A	WP_001302447.1	DUF1778 domain-containing protein	4267965-4268243	279
TW14359_04364	CC11	Pipeline A	WP_001301452.1	N-acetyltransferase	4268234-4268719	486
TW14359_04384	CC11	Pipeline A	WP_000035581.1	DNA helicase RecQ	4294230-4293841	390
TW14359_04385	CC11	Pipeline A	WP_000035581.1	DNA helicase RecQ	4294835-4294227	609
ECs4542	CC11	Pipeline B	WP_000014216.1	hypothetical protein	4584962-4585303	342
ECs4544	CC11	Pipeline B	WP_001280481.1	DUF4942 domain-containing protein	4585504-4585689	186
TW14359_04662	CC11	Pipeline A	WP_001092000.1	type III secretion system LEE translocon pore-forming subunit EspB	4591981-4591043	939
TW14359_04663	CC11	Pipeline A	WP_000935759.1	type III secretion system LEE translocon pore-forming subunit EspD	4593126-4592002	1125
TW14359_04669	CC11	Pipeline A	WP_001301454.1	type III secretion system LEE translocated intimin receptor Tir	4601606-4599930	1677
TW14359_04678	CC11	Pipeline A	WP_000386949.1	type III secretion system LEE cytoprotective effector EspZ	4609580-4609879	300
ECs4608	CC11	Pipeline B	WP_010917868.1	hypothetical protein	4639139-4639453	315
ECs4609	CC11	Pipeline B	WP_000229982.1	hypothetical protein	4639731-4640213	483
TW14359_04715	CC11	Pipeline A	WP_000229982.1	hypothetical protein	4640213-4639731	483
ECs4610	CC11	Pipeline B	WP_000168040.1	hypothetical protein	4640361-4641014	654
ECs4642	CC11	Pipeline B	WP_001456706.1	hypothetical protein	4674575-4674805	231
TW14359_04748	CC11	Pipeline A	WP_001456706.1	hypothetical protein	4674805-4674575	231
TW14359_04761	CC11	Pipeline A	WP_001303732.1	hypothetical protein	4692912-4690651	2262
ECs4668	CC11	Pipeline B	WP_001310364.1	fimbrial chaperone	4703193-4703354	162
ECs5245	CC11	Pipeline B	WP_010917883.1	DUF4160 domain-containing protein	5350719-5351003	285
ECs5247	CC11	Pipeline B	WP_010917884.1	hypothetical protein	5352114-5352290	177
ECs5248	CC11	Pipeline B	WP_000588536.1	DUF1643 domain-containing protein	5352554-5353021	468
ECs5250	CC11	Pipeline B	WP_000997747.1	hypothetical protein	5353982-5355298	1317
ECs5251	CC11	Pipeline B	WP_000047841.1	hypothetical protein	5355450-5356223	774
ECs5292	CC11	Pipeline B	WP_001303777.1	hypothetical protein	5421500-5421700	201
ECs5304	CC11	Pipeline B	WP_001304007.1	DUF262 domain-containing protein	5435152-5436033	882
TW14359_05404	CC11	Pipeline A	WP_000110082.1	type I restriction endonuclease EcoAI subunit S	5439607-5437853	1755
ECs5338	CC11	Pipeline B	WP_096185022.1	DUF3029 domain-containing protein	5473358-5473603	246
C820_12_04054	CC20	Pipeline A	WP_000729595.1	fructose-like phosphotransferase enzyme IIA component	799150-799507	357
C820_12_05301	CC20	Pipeline A	WP_000512316.1	hypothetical protein	877122-876937	185
DC22_RS0127375	CC20	Pipeline B	WP_072196072.1	hypothetical protein	1055069-1055287	219
C820_12_02679	CC20	Pipeline A	WP_072196072.1	winged helix-turn-helix domain-containing protein	1055081-1055287	206
DC22_RS15205	CC20	Pipeline B	WP_000543042.1	hypothetical protein	1957654-1958064	411
DC22_RS14885	CC20	Pipeline B	WP_000566773.1	hypothetical protein	2187455-2187847	393
DC22_RS14895	CC20	Pipeline B	WP_072185350.1	hypothetical protein	2188232-2188423	192
DC22_RS00680	CC20	Pipeline B	WP_000376434.1	hypothetical protein	3146000-3146419	420
DC22_RS0127735	CC20	Pipeline B	WP_000900136.1	hypothetical protein	3674618-3674372	246
C820_12_05114	CC20	Pipeline A	WP_001145628.1	DUF1076 domain-containing protein	3677844-3677206	638
C820_12_05115	CC20	Pipeline A	WP_001111205.1	bfpT-regulated chaperone	3678042-3678626	584
DC22_RS13830	CC20	Pipeline B	WP_001127874.1	hypothetical protein	5262386-5265542	3156
DC22_RS13825	CC20	Pipeline B	WP_001046727.1	ATP-dependent DNA helicase RecQ	5265547-5268115	2568
DC22_RS13820	CC20	Pipeline B	WP_000022531.1	hypothetical protein	5268099-5269004	906
DC22_RS13815	CC20	Pipeline B	WP_001135894.1	hypothetical protein	5269003-5272060	3057
DC22_RS13810	CC20	Pipeline B	WP_000005723.1	hypothetical protein	5272056-5272848	792
DC22_RS13805	CC20	Pipeline B	WP_000435028.1	DEAD/DEAH box helicase	5272863-5277393	4530
DC22_RS13800	CC20	Pipeline B	WP_001097549.1	hypothetical protein	5277389-5277932	543
DC22_RS13795	CC20	Pipeline B	WP_001083255.1	hypothetical protein	5277928-5280184	2256
DC22_RS13785	CC20	Pipeline B	WP_001180706.1	inovirus Gp2 family protein	5281940-5281365	576
DC22_RS13780	CC20	Pipeline B	WP_000656300.1	hypothetical protein	5282723-5282130	594
DC22_RS13775	CC20	Pipeline B	WP_000213332.1	AlpA family phage regulatory protein	5283026-5282820	207
DC22_RS13770	CC20	Pipeline B	WP_000240138.1	hypothetical protein	5283510-5284395	885
DC22_RS13760	CC20	Pipeline B	WP_000174910.1	WYL domain-containing protein	5285598-5286315	717
DC22_RS13755	CC20	Pipeline B	WP_000734322.1	hypothetical protein	5286350-5286803	453
DC22_RS0126890	CC20	Pipeline B	WP_001298943.1	hypothetical protein	5286874-5287321	447
DC22_RS13725	CC20	Pipeline B	WP_001193489.1	hypothetical protein	5289965-5290337	372
